# Supplementary material for: Cytosporin Derivatives from Arctic-Derived Fungus Eutypella sp. D-1 via the OSMAC Approach
Source: MDPI journal article supplement (doi:10.3390/md21070382), 2023-06-28

## Supplementary data

# Cytosporin Derivatives from Arctic-derived Fungus *Eutypella* sp. D-1 by OSMAC Approach

Hao-Bing Yu <sup>1,†</sup>, Zhe Ning <sup>1,†</sup>, Bo Hu <sup>1</sup>, Yu-Ping Zhu <sup>2</sup>, Xiao-Ling Lu <sup>3</sup>, Ying He <sup>1</sup>, Bing-Hua Jiao <sup>3</sup>, and Xiao-Yu Liu <sup>1,\*</sup>

<sup>1</sup> Department of Marine Biomedicine and Polar Medicine, Naval Medical Center of PLA, Naval Medical University, Shanghai 200433, China; yuhaobing1986@126.com (H.-B.Y.); Ningzhe95@163.com (Z.N.); hb8601@163.com (B.H.); yinghe\_hys@163.com (Y.H.)

<sup>2</sup> Basic Medical Experimental Teaching Center, College of Basic Medical Sciences, Naval Medical University, Shanghai 200433, China; zhuyuping72@hotmail.com (Y.-P.Z.);

<sup>3</sup> Department of Biochemistry and Molecular Biology, College of Basic Medical Sciences, Naval Medical University, Shanghai 200433, China; luxiaoling80@126.com (X.-L.L.); jiaobh@live.cn (B.-H. J.)

\* Correspondence: biolxy@163.com; Tel.: +86-21-81870970

† These authors contributed equally to this work.

S1. Quantum chemical CD calculation of compound **4**.  
S2. Quantum chemical CD calculation of compound **5**.  
S3. Quantum chemical CD calculation of compound **6**.  
S4. Quantum chemical CD calculation of compound **7**.  
S5. <sup>1</sup>H NMR spectrum of eutypelleudesmane A (**1**) in CDCl<sub>3</sub>.  
S6. <sup>13</sup>C NMR spectrum of eutypelleudesmane A (**1**) in CDCl<sub>3</sub>.  
S7. DEPT135 spectrum of eutypelleudesmane A (**1**) in CDCl<sub>3</sub>.  
S8. HSQC spectrum of eutypelleudesmane A (**1**) in CDCl<sub>3</sub>.  
S9. COSY spectrum of eutypelleudesmane A (**1**) in CDCl<sub>3</sub>.  
S10. HMBC spectrum of eutypelleudesmane A (**1**) in CDCl<sub>3</sub>.  
S11. NOESY spectrum of eutypelleudesmane A (**1**) in CDCl<sub>3</sub>.  
S12. HRESIMS of eutypelleudesmane A (**1**).  
S13. UV spectrum of eutypelleudesmane A (**1**) in MeOH.  
S14. IR spectrum of eutypelleudesmane A (**1**) (KBr).  
S15. <sup>1</sup>H NMR spectrum of cytosporin X (**2**) in CDCl<sub>3</sub>.  
S16. <sup>1</sup>H NMR spectrum of cytosporin X (**2**) in DMSO-*d*<sub>6</sub>.  
S17. <sup>13</sup>C NMR spectrum of cytosporin X (**2**) in CDCl<sub>3</sub>.  
S18. DEPT135 spectrum of cytosporin X (**2**) in CDCl<sub>3</sub>.  
S19. HSQC spectrum of cytosporin X (**2**) in CDCl<sub>3</sub>.  
S20. COSY spectrum of cytosporin X (**2**) in CDCl<sub>3</sub>.  
S21. HMBC spectrum of cytosporin X (**2**) in CDCl<sub>3</sub>.  
S22. NOESY spectrum of cytosporin X (**2**) in CDCl<sub>3</sub>.  
S23. NOESY spectrum of cytosporin X (**2**) in DMSO-*d*<sub>6</sub>.  
S24. HRESIMS of cytosporin X (**2**).  
S25. UV spectrum of cytosporin X (**2**) in MeOH.  
S26. IR spectrum of cytosporin X (**2**) (KBr).  
S27. <sup>1</sup>H NMR spectrum of cytosporin Y (**3**) in CDCl<sub>3</sub>.  
S28. <sup>13</sup>C NMR spectrum of cytosporin Y (**3**) in CDCl<sub>3</sub>.  
S29. DEPT135 spectrum of cytosporin Y (**3**) in CDCl<sub>3</sub>.  
S30. HSQC spectrum of cytosporin Y (**3**) in CDCl<sub>3</sub>.  
S31. COSY spectrum of cytosporin Y (**3**) in CDCl<sub>3</sub>.  
S32. HMBC spectrum of cytosporin Y (**3**) in CDCl<sub>3</sub>.  
S33. NOESY spectrum of cytosporin Y (**3**) in CDCl<sub>3</sub>.  
S34. HRESIMS of cytosporin Y (**3**).  
S35. UV spectrum of cytosporin Y (**3**) in MeOH.  
S36. IR spectrum of cytosporin Y (**3**) (KBr).  
S37. <sup>1</sup>H NMR spectrum of cytosporin Y<sub>1</sub> (**4**) in MeOD-*d*<sub>4</sub>.  
S38. <sup>13</sup>C NMR spectrum of cytosporin Y<sub>1</sub> (**4**) in MeOD-*d*<sub>4</sub>.  
S39. DEPT135 spectrum of cytosporin Y<sub>1</sub> (**4**) in MeOD-*d*<sub>4</sub>.  
S40. HSQC spectrum of cytosporin Y<sub>1</sub> (**4**) in MeOD-*d*<sub>4</sub>.  
S41. COSY spectrum of cytosporin Y<sub>1</sub> (**4**) in MeOD-*d*<sub>4</sub>.  
S42. HMBC spectrum of cytosporin Y<sub>1</sub> (**4**) in MeOD-*d*<sub>4</sub>.  
S43. NOESY spectrum of cytosporin Y<sub>1</sub> (**4**) in MeOD-*d*<sub>4</sub>.  
S44. HRESIMS of cytosporin Y<sub>1</sub> (**4**).

S45. UV spectrum of cytosporin Y<sub>1</sub> (4) in MeOH.  
S46. IR spectrum of cytosporin Y<sub>1</sub> (4) (KBr).  
S47. <sup>1</sup>H NMR spectrum of cytosporin Y<sub>2</sub> (5) in MeOD-*d*<sub>4</sub>.  
S48. <sup>13</sup>C NMR spectrum of cytosporin Y<sub>2</sub> (5) in MeOD-*d*<sub>4</sub>.  
S49. DEPT135 spectrum of cytosporin Y<sub>2</sub> (5) in MeOD-*d*<sub>4</sub>.  
S50. HSQC spectrum of cytosporin Y<sub>2</sub> (5) in MeOD-*d*<sub>4</sub>.  
S51. COSY spectrum of cytosporin Y<sub>2</sub> (5) in MeOD-*d*<sub>4</sub>.  
S52. HMBC spectrum of cytosporin Y<sub>2</sub> (5) in MeOD-*d*<sub>4</sub>.  
S53. NOESY spectrum of cytosporin Y<sub>2</sub> (5) in MeOD-*d*<sub>4</sub>.  
S54. HRESIMS of cytosporin Y<sub>2</sub> (5).  
S55. UV spectrum of cytosporin Y<sub>2</sub> (5) in in MeOH.  
S56. IR spectrum of cytosporin Y<sub>2</sub> (5) (KBr).  
S57. <sup>1</sup>H NMR spectrum of cytosporin Y<sub>3</sub> (6) in CDCl<sub>3</sub>.  
S58. <sup>13</sup>C NMR spectrum of cytosporin Y<sub>3</sub> (6) in CDCl<sub>3</sub>.  
S59. DEPT135 spectrum of cytosporin Y<sub>3</sub> (6) in CDCl<sub>3</sub>.  
S60. HSQC spectrum of cytosporin Y<sub>3</sub> (6) in CDCl<sub>3</sub>.  
S61. COSY spectrum of cytosporin Y<sub>3</sub> (6) in CDCl<sub>3</sub>.  
S62. HMBC spectrum of cytosporin Y<sub>3</sub> (6) in CDCl<sub>3</sub>.  
S63. NOESY spectrum of cytosporin Y<sub>3</sub> (6) in CDCl<sub>3</sub>.  
S64. HRESIMS of cytosporin Y<sub>3</sub> (6).  
S65. UV spectrum of cytosporin Y<sub>3</sub> (6) in MeOH.  
S66. IR spectrum of cytosporin Y<sub>3</sub> (6) (KBr).  
S67. <sup>1</sup>H NMR spectrum of cytosporin E<sub>1</sub> (7) in CDCl<sub>3</sub>.  
S68. <sup>1</sup>H NMR spectrum of cytosporin E<sub>1</sub> (7) in DMSO-*d*<sub>6</sub>.  
S69. <sup>13</sup>C NMR spectrum of cytosporin E<sub>1</sub> (7) in CDCl<sub>3</sub>.  
S70. DEPT135 spectrum of cytosporin E<sub>1</sub> (7) in CDCl<sub>3</sub>.  
S71. HSQC spectrum of cytosporin E<sub>1</sub> (7) in CDCl<sub>3</sub>.  
S72. COSY spectrum of cytosporin E<sub>1</sub> (7) in CDCl<sub>3</sub>.  
S73. HMBC spectrum of cytosporin E<sub>1</sub> (7) in CDCl<sub>3</sub>.  
S74. NOESY spectrum of cytosporin E<sub>1</sub> (7) in CDCl<sub>3</sub>.  
S75. NOESY spectrum of cytosporin E<sub>1</sub> (7) in DMSO-*d*<sub>6</sub>.

# S1. Quantum chemical CD calculation of compound **4**.

Conformational analysis was initially performed using Spartan'10 software (Wavefunction, Inc., Irvine, CA, USA) at MMFF94 force field. The conformers with Boltzmann-population of over 5% were chosen for ECD calculations, and then the conformers were initially optimized at B3LYP/DGDZVP level in MeOH using the continuum polarizable continuum model (CPCM). Harmonic vibration frequencies were calculated to confirm the stability of these conformers. As revealed by the frequency analysis, no imaginary frequencies were observed in ground states. The theoretical calculation of ECD was conducted in MeOH using Time-dependent Density functional theory (TD-DFT) at the CAM-B3LYP/DGDZVP level for all conformers of compound **4**. The CD spectra were generated by the program GaussView 6.0 (University of Würzburg, Würzburg, Germany) using a Gaussian band shape with 0.3 eV exponential half-width from dipole-length dipolar and rotational strengths.

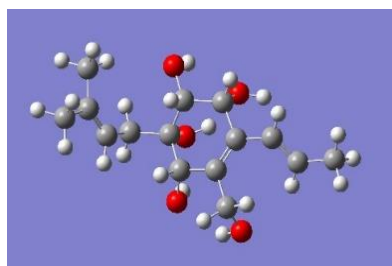

**4a**

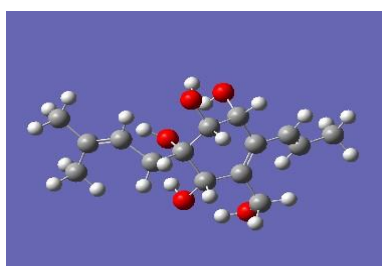

**4b**

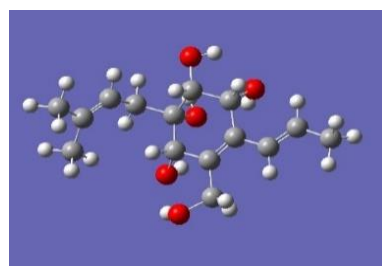

**4c**

| compound Model-4 | Conformer | $\Delta E(\text{kcal/mol})$ | Population(%) |
|------------------|-----------|-----------------------------|---------------|
|                  | <b>4a</b> | 0                           | 73.6          |
|                  | <b>4b</b> | 0.91                        | 15.8          |
|                  | <b>4c</b> | 1.15                        | 10.6          |

## S2. Quantum chemical CD calculation of compound 5.

Conformational analysis was initially performed using Spartan'10 software (Wavefunction, Inc., Irvine, CA, USA) at MMFF94 force field. The conformers with Boltzmann-population of over 5% were chosen for ECD calculations, and then the conformers were initially optimized at B3LYP/DGDZVP level in MeOH using the continuum polarizable continuum model (CPCM). Harmonic vibration frequencies were calculated to confirm the stability of these conformers. As revealed by the frequency analysis, no imaginary frequencies were observed in ground states. The theoretical calculation of ECD was conducted in MeOH using Time-dependent Density functional theory (TD-DFT) at the CAM-B3LYP/DGDZVP level for all conformers of compound 5. The CD spectra were generated by the program GaussView 6.0 (University of Würzburg, Würzburg, Germany) using a Gaussian band shape with 0.3 eV exponential half-width from dipole-length dipolar and rotational strengths.

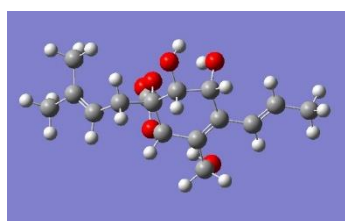

**5a**

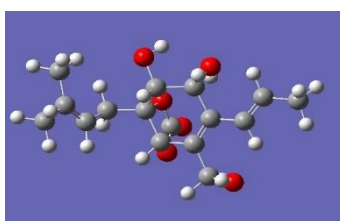

**5b**

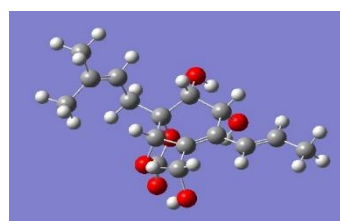

**5c**

| compound Model-5 | Conformer | $\Delta E(\text{kcal/mol})$ | Population(%) |
|------------------|-----------|-----------------------------|---------------|
|                  | <b>5a</b> | 0                           | 65.0          |
|                  | <b>5b</b> | 0.58                        | 24.4          |
|                  | <b>5c</b> | 1.07                        | 10.6          |

### S3. Quantum chemical CD calculation of compound **6**.

Conformational analysis was initially performed using Spartan'10 software (Wavefunction, Inc., Irvine, CA, USA) at MMFF94 force field. The conformers with Boltzmann-population of over 5% were chosen for ECD calculations, and then the conformers were initially optimized at B3LYP/DGDZVP level in MeOH using the continuum polarizable continuum model (CPCM). Harmonic vibration frequencies were calculated to confirm the stability of these conformers. As revealed by the frequency analysis, no imaginary frequencies were observed in ground states. The theoretical calculation of ECD was conducted in MeOH using Time-dependent Density functional theory (TD-DFT) at the CAM-B3LYP/DGDZVP level for all conformers of compound **6**. The CD spectra were generated by the program GaussView 6.0 (University of Würzburg, Würzburg, Germany) using a Gaussian band shape with 0.3 eV exponential half-width from dipole-length dipolar and rotational strengths.

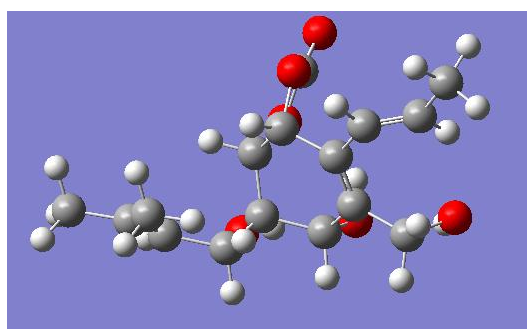

**6a**

| compound Model- <b>6a</b> | Conformer | $\Delta E(\text{kcal/mol})$ | Population(%) |
|---------------------------|-----------|-----------------------------|---------------|
|                           | 1         | 0                           | 99.9%         |

#### S4. Quantum chemical CD calculation of compound 7.

Quantum chemical CD calculation of compound **7** Conformational analysis was initially performed using Spartan'10 software (Wavefunction, Inc., Irvine, CA, USA) at MMFF94 force field. The conformers with Boltzmann-population of over 5% were chosen for ECD calculations, and then the conformers were initially optimized at B3LYP/DGDZVP level in MeOH using the continuum polarizable continuum model (CPCM). Harmonic vibration frequencies were calculated to confirm the stability of these conformers. As revealed by the frequency analysis, no imaginary frequencies were observed in ground states. The theoretical calculation of ECD was conducted in MeOH using Time-dependent Density functional theory (TD-DFT) at the CAM-B3LYP/DGDZVP level for all conformers of compound **7**. The CD spectra were generated by the program GaussView 6.0 (University of Würzburg, Würzburg, Germany) using a Gaussian band shape with 0.3 eV exponential half-width from dipole-length dipolar and rotational strengths.

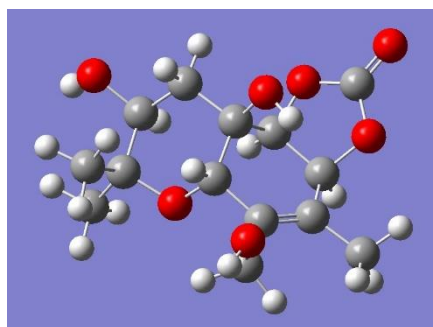

**7a**

| compound Model-7 | Conformer | $\Delta E(\text{kcal/mol})$ | Population(%) |
|------------------|-----------|-----------------------------|---------------|
|                  | <b>7a</b> | 0                           | 99.9%         |

S5.  $^1\text{H}$  NMR spectrum of eutypelleudesmane A (**1**) in  $\text{CDCl}_3$ .

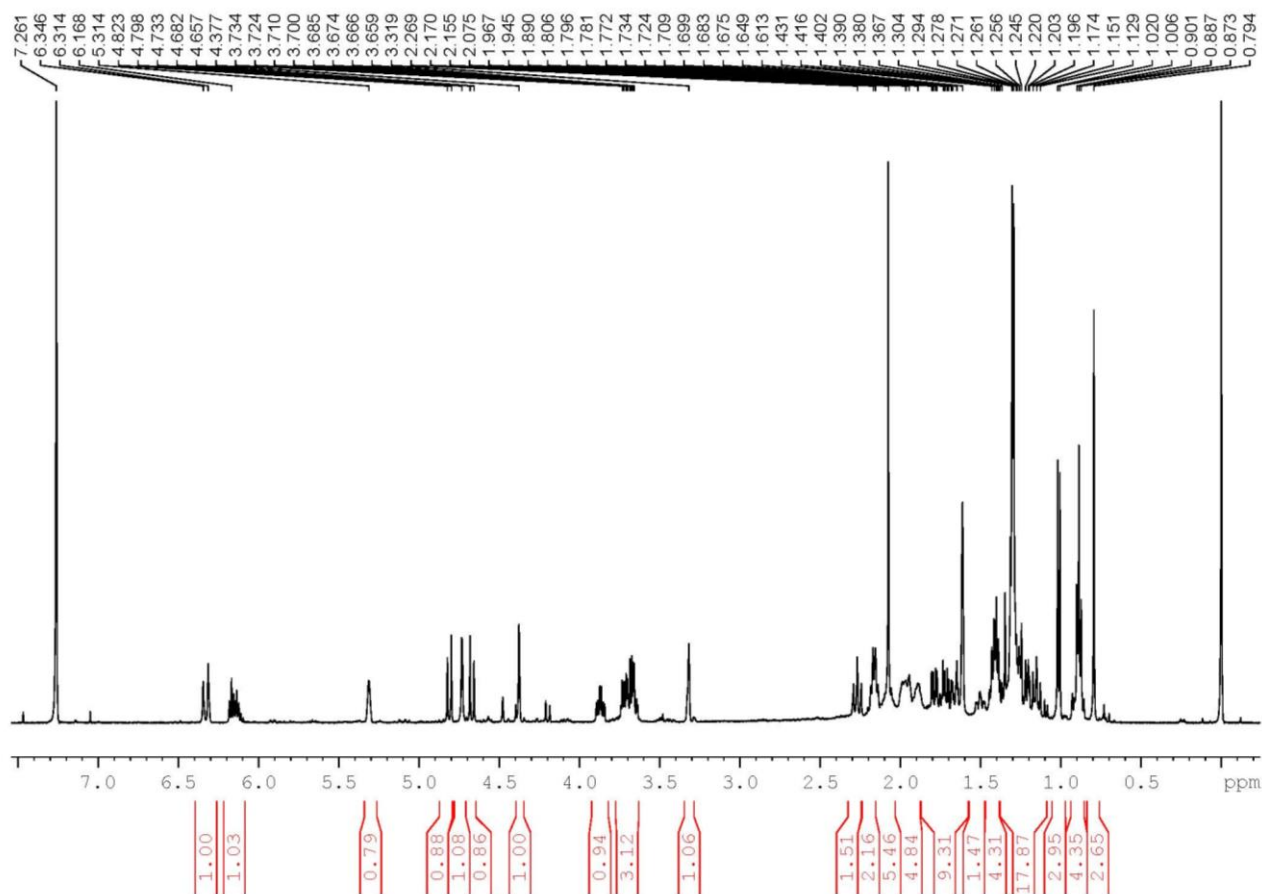

S6.  $^{13}\text{C}$  NMR spectrum of eutypelleudesmane A (**1**) in  $\text{CDCl}_3$ .

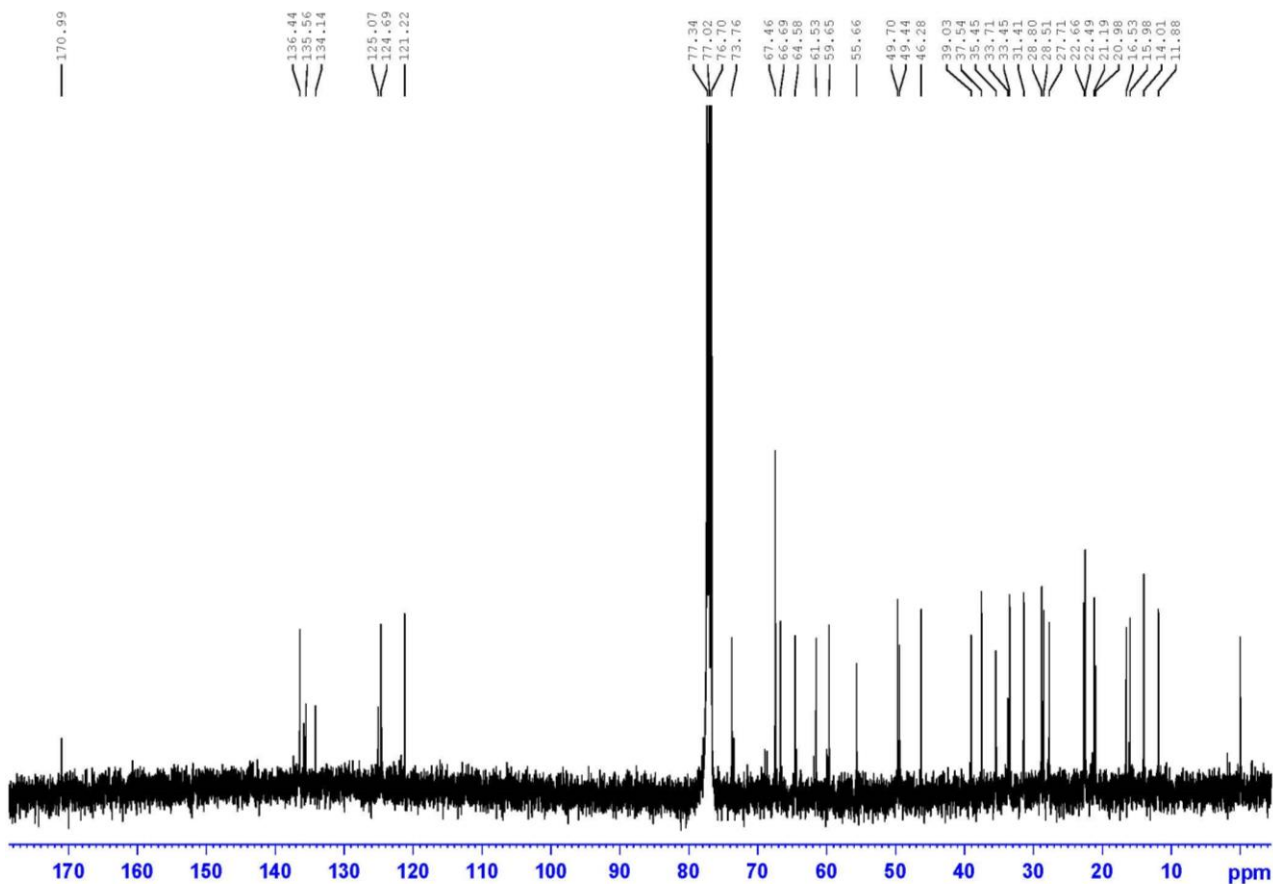



S7. DEPT135 spectrum of eutypelleudesmane A (**1**) in CDCl<sub>3</sub>.

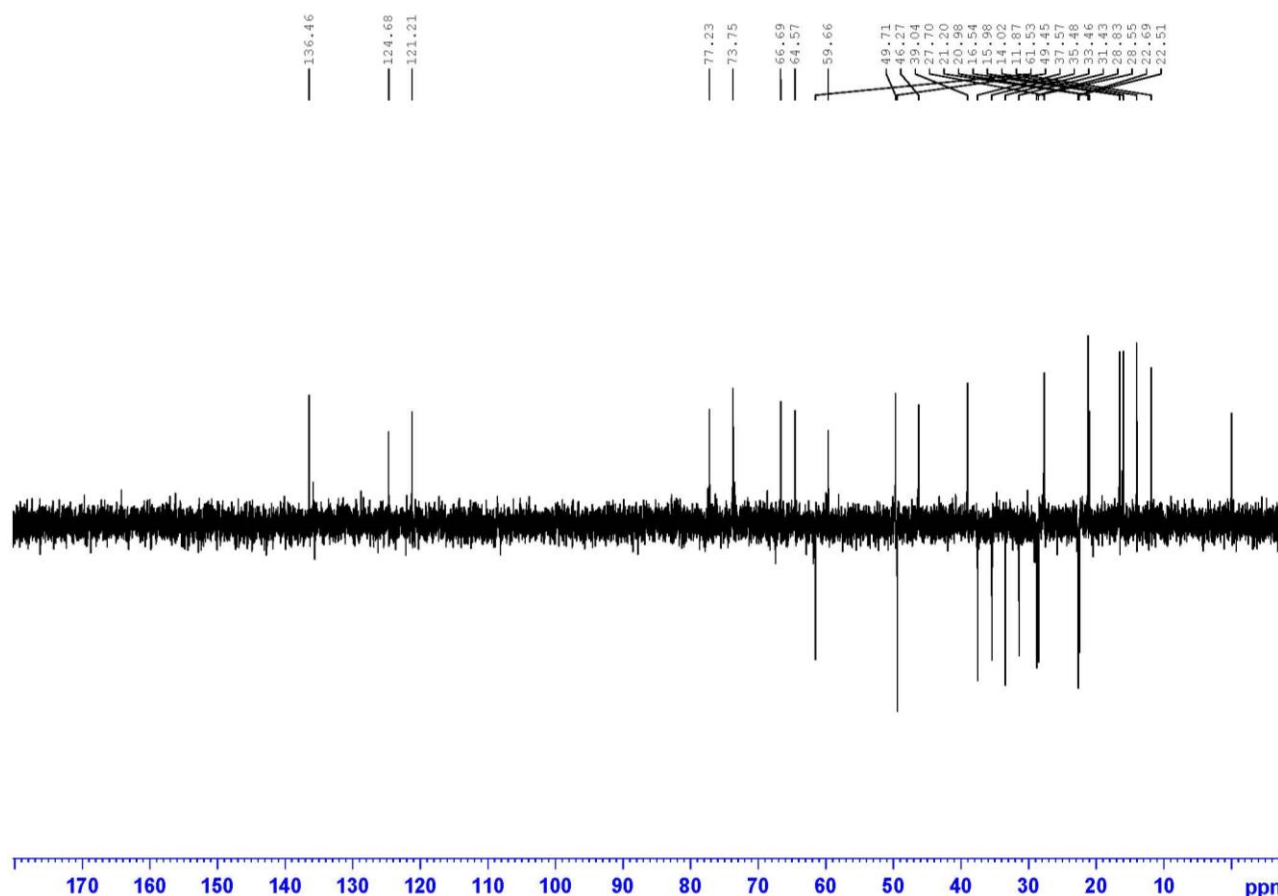

S8. HSQC spectrum of eutypelleudesmane A (**1**) in CDCl<sub>3</sub>.

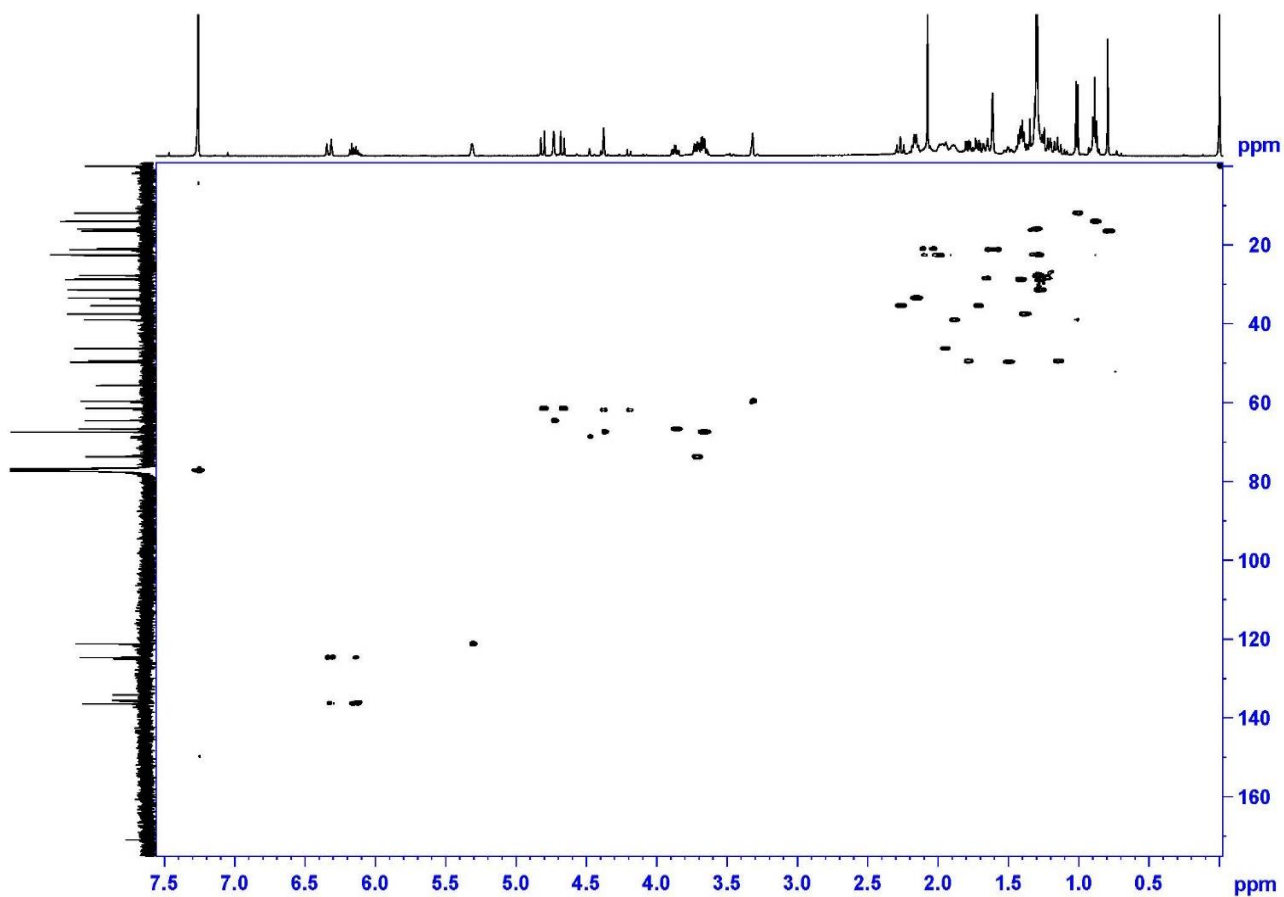

S9. COSY spectrum of eutypelleudesmane A (1) in CDCl<sub>3</sub>.

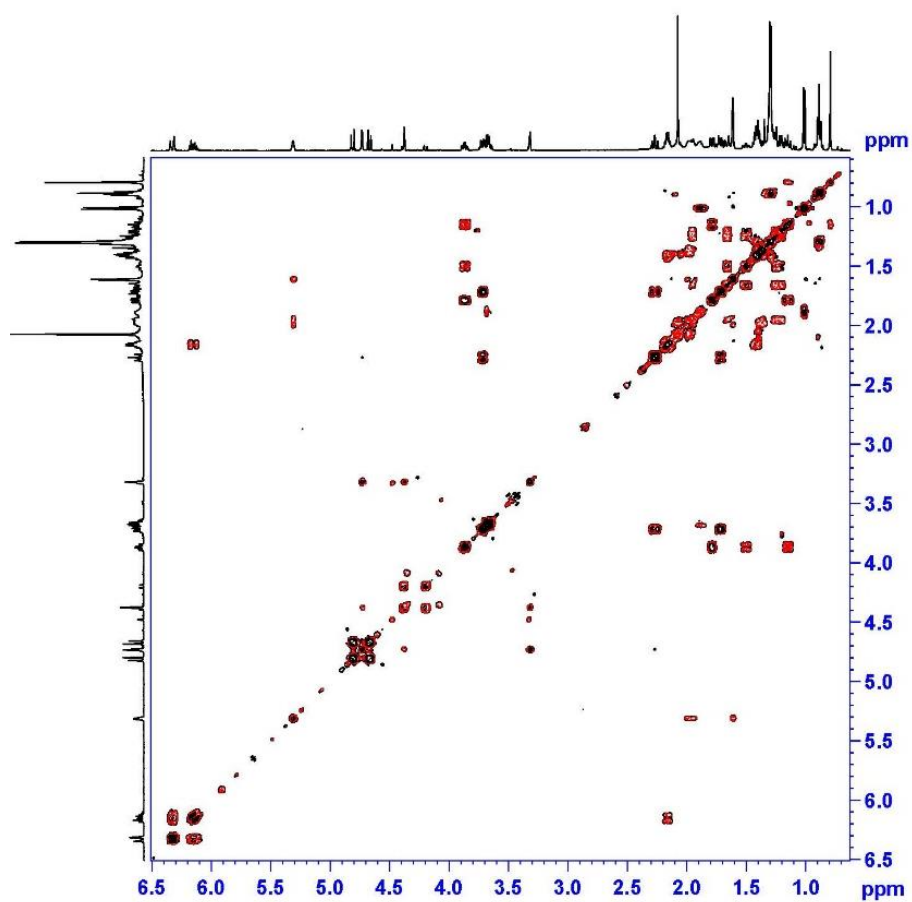

S10. HMBC spectrum of eutypelleudesmane A (1) in CDCl<sub>3</sub>.

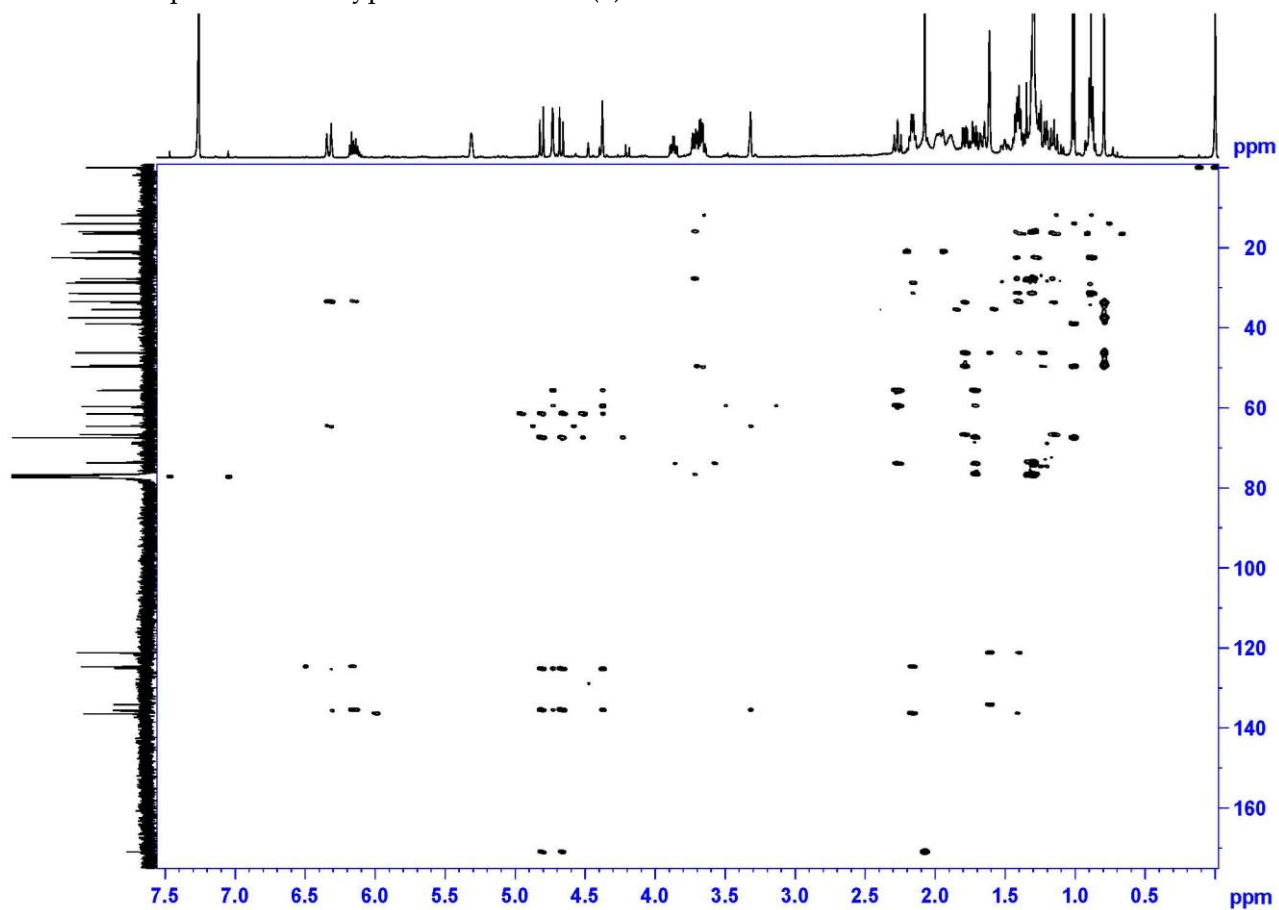

S11. NOESY spectrum of eutypelleudesmane A (1) in CDCl<sub>3</sub>.

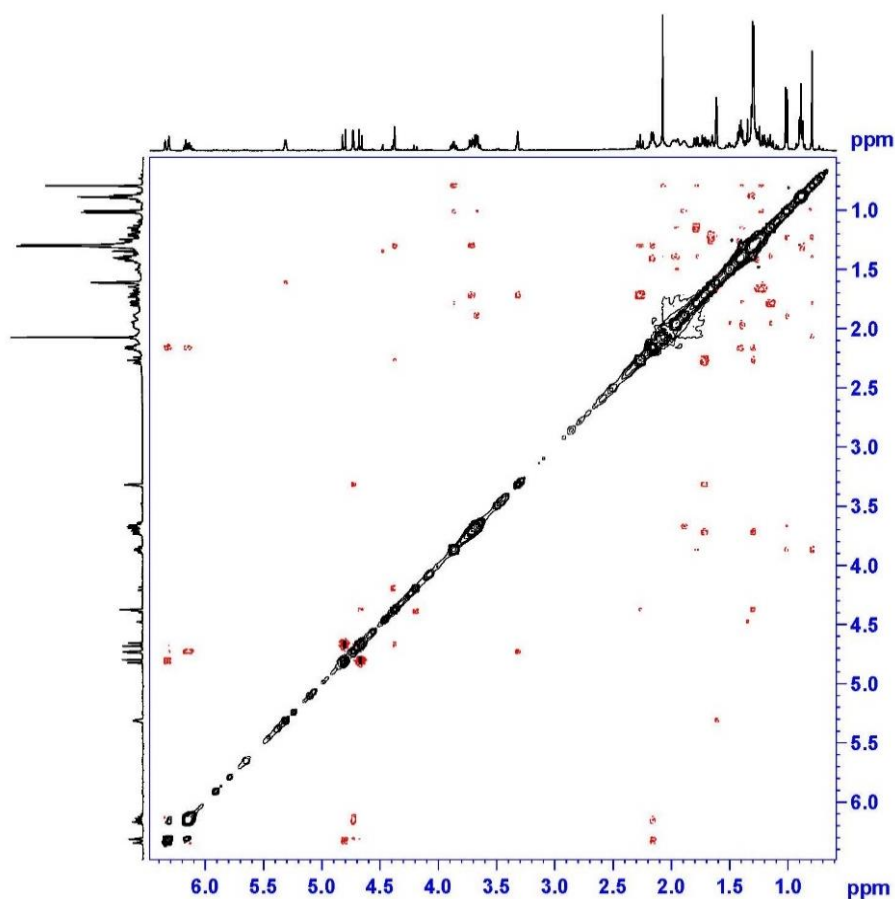

S12. HRESIMS of eutypelleudesmane A (1).

### Qualitative Analysis Report

|                        |                   |               |       |
|------------------------|-------------------|---------------|-------|
| Data Filename          | W-44-POS.d        | Sample Name   |       |
| Sample Type            | Sample            | Position      | P1-F4 |
| Instrument Name        | Instrument 1      | User Name     |       |
| Acq Method             | SERUM-POS-15MIN.m | Acquired Time |       |
| IRM Calibration Status | Success           | DA Method     | E.m   |

#### User Spectra

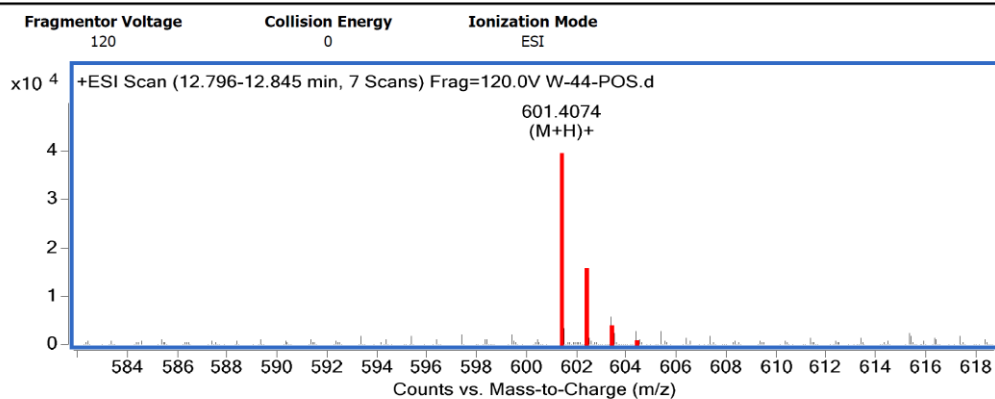

#### Formula Calculator Element Limits

| Element | Min | Max |
|---------|-----|-----|
| C       | 0   | 50  |
| H       | 0   | 400 |
| O       | 0   | 20  |

#### Formula Calculator Results

| Formula    | Best | Mass     | Tgt Mass | Diff (ppm) | Ion Species | Score |
|------------|------|----------|----------|------------|-------------|-------|
| C36 H57 O7 | TRUE | 601.4074 | 601.4104 | 4.9        | C36 H57 O7  | 83.16 |

--- End Of Report ---

S13. UV spectrum of eutypelleudesmane A (**1**) in MeOH.

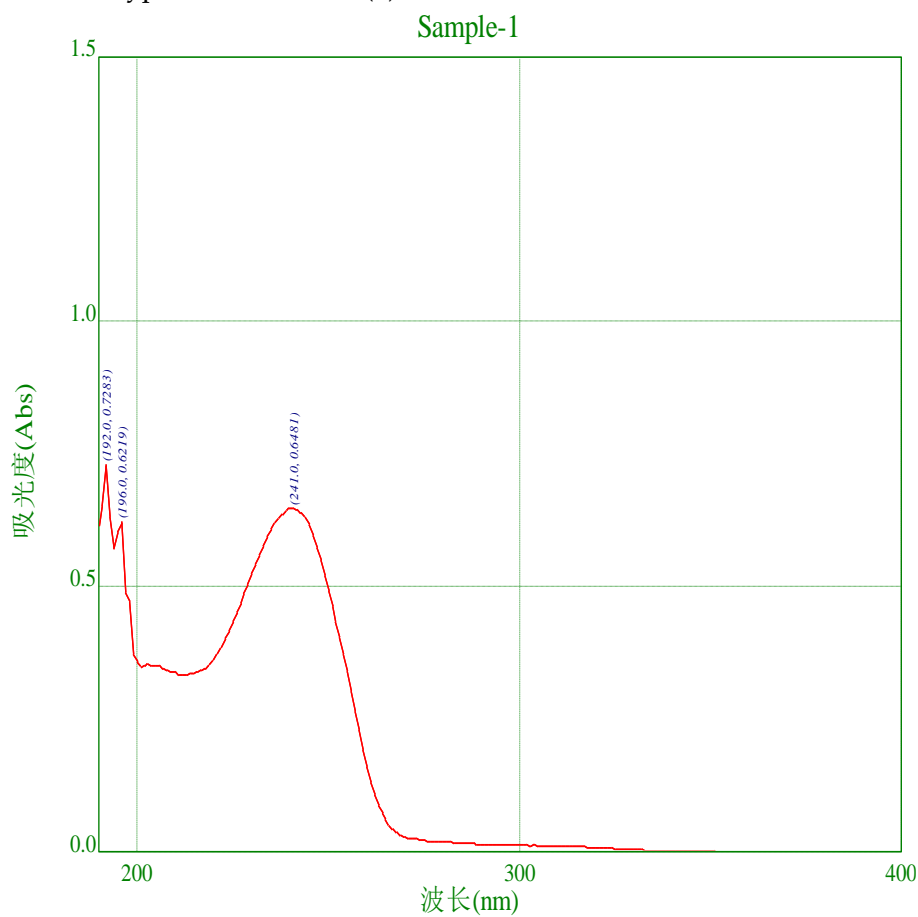

S14. IR spectrum of eutypelleudesmane A (**1**) (KBr).

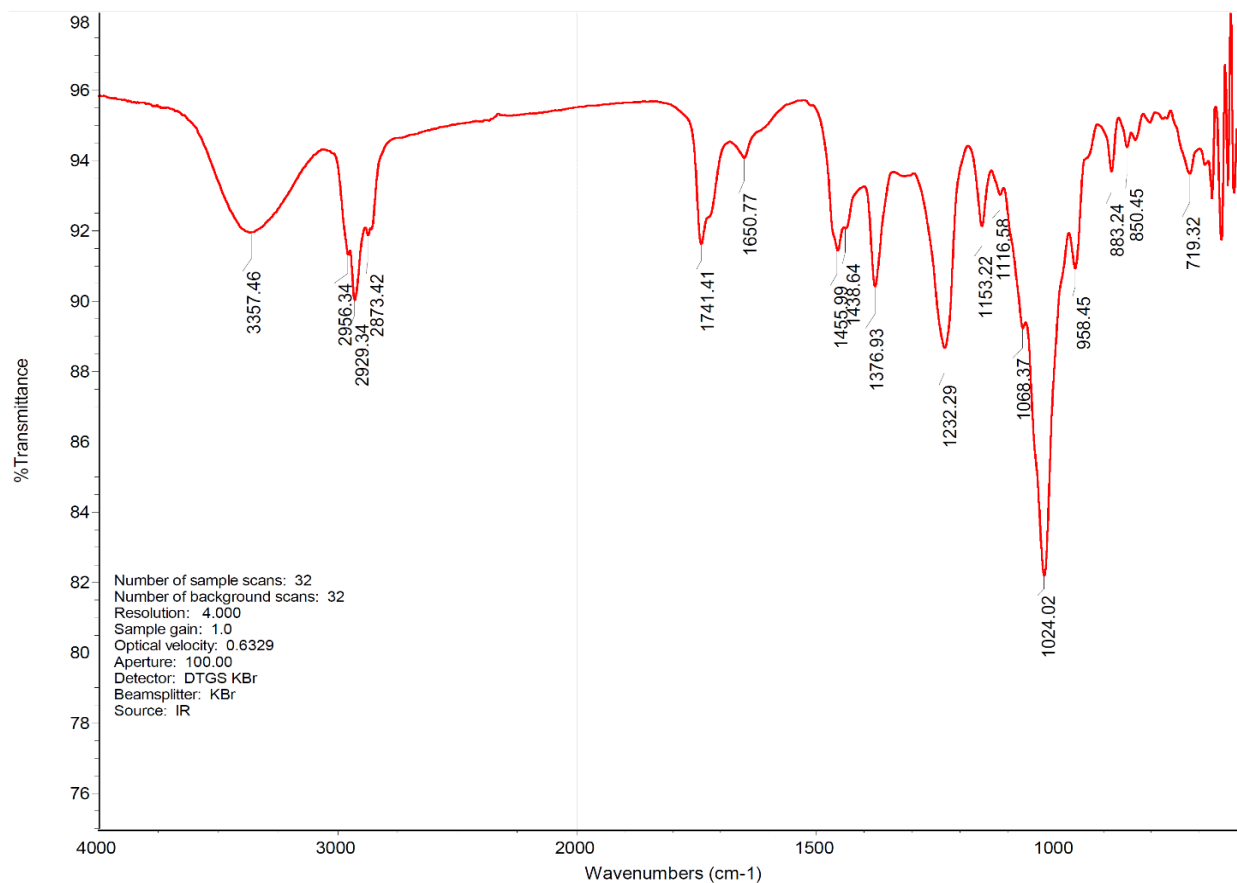

S25.  $^1\text{H}$  NMR spectrum of cytosporin X (**2**) in  $\text{CDCl}_3$ .

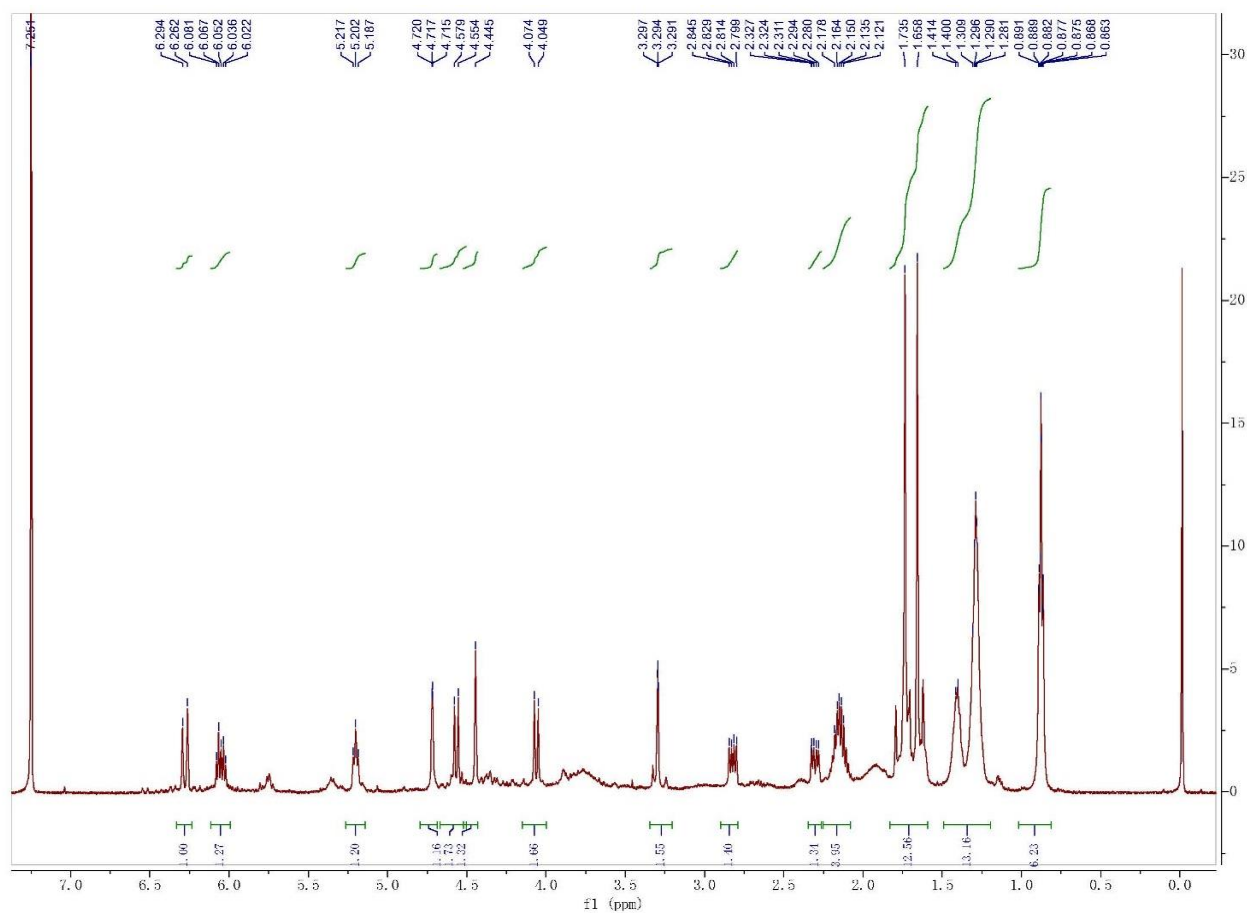

S36.  $^1\text{H}$  NMR spectrum of cytosporin X (**2**) in  $\text{DMSO}-d_6$ .

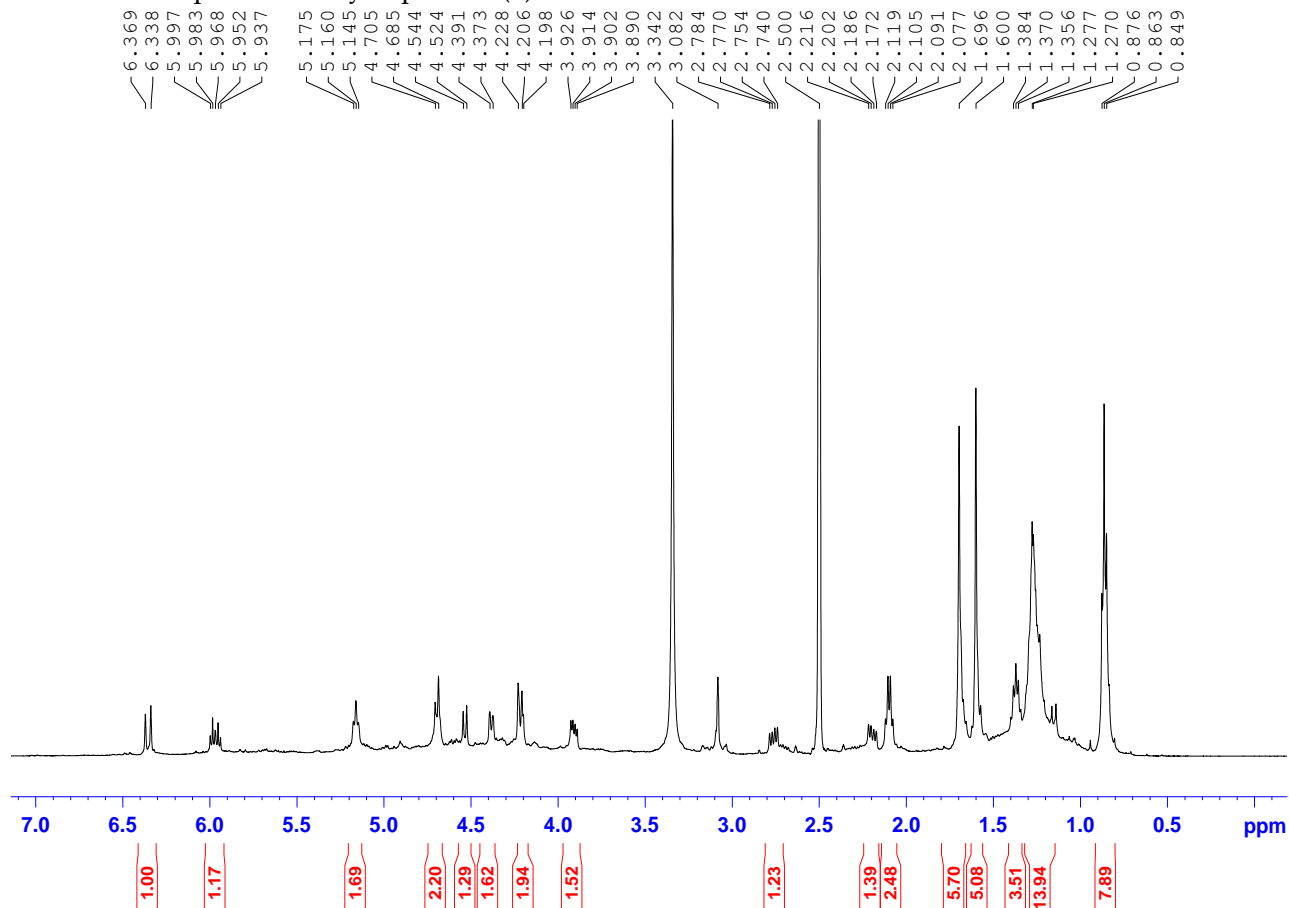

S47.  $^{13}\text{C}$  NMR spectrum of cytosporin X (2) in  $\text{CDCl}_3$ .

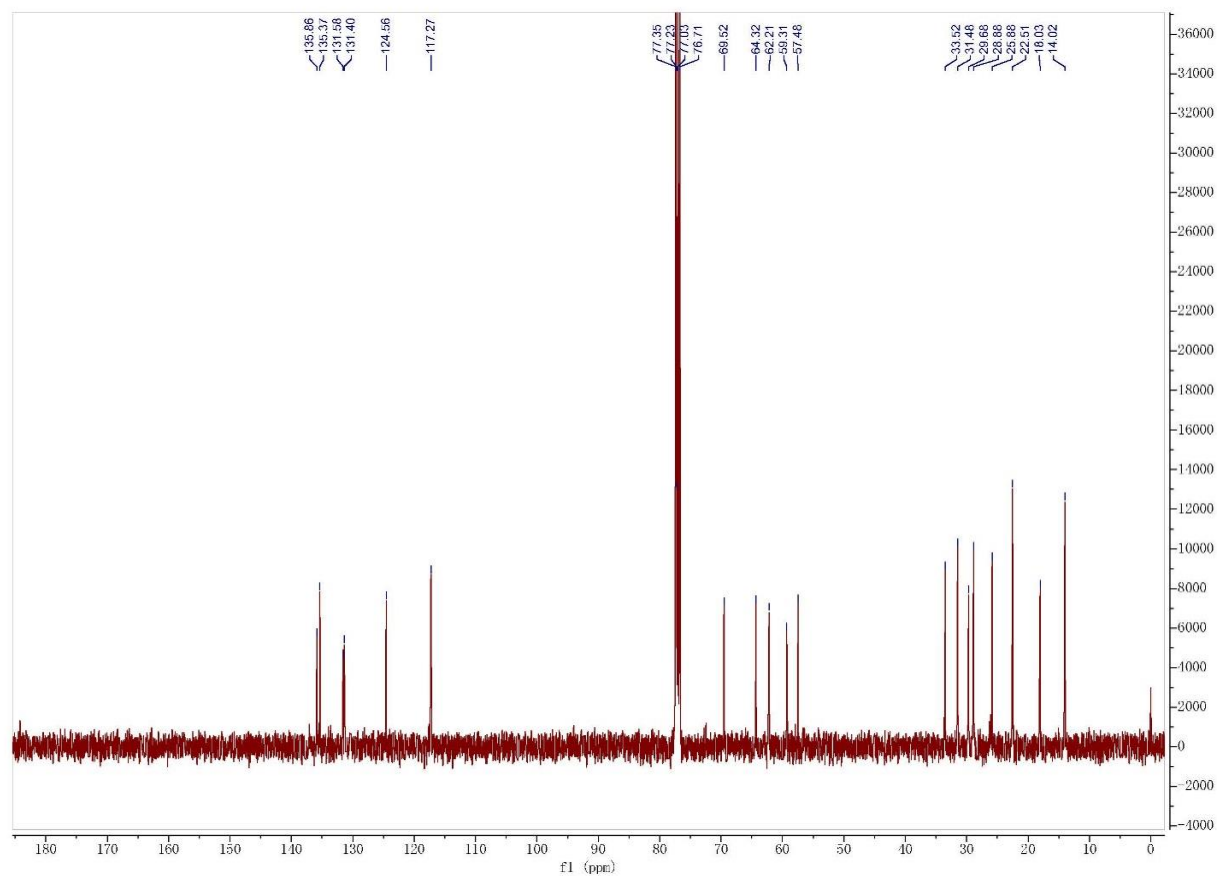

S58. DEPT135 spectrum of cytosporin X (2) in  $\text{CDCl}_3$ .

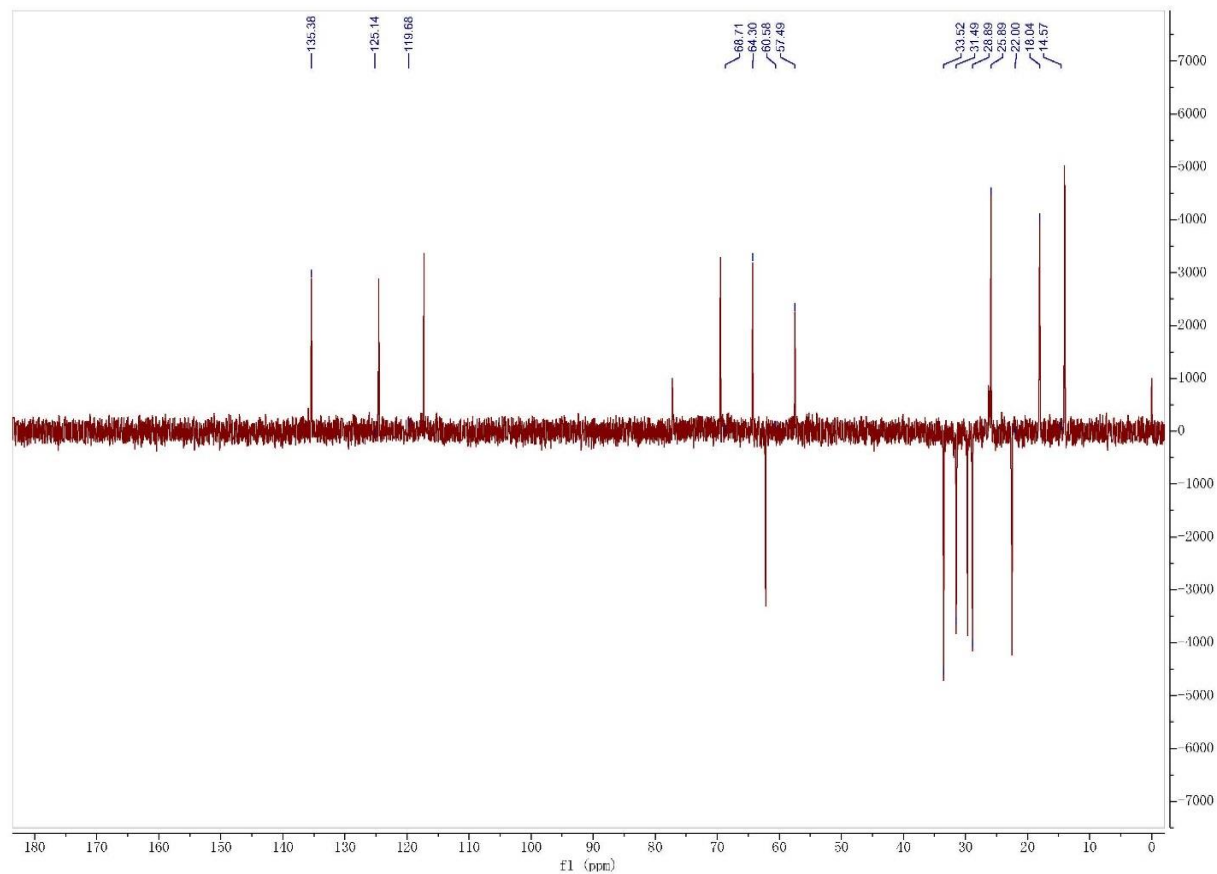

S69. HSQC spectrum of cytosporin X (**2**) in CDCl<sub>3</sub>.

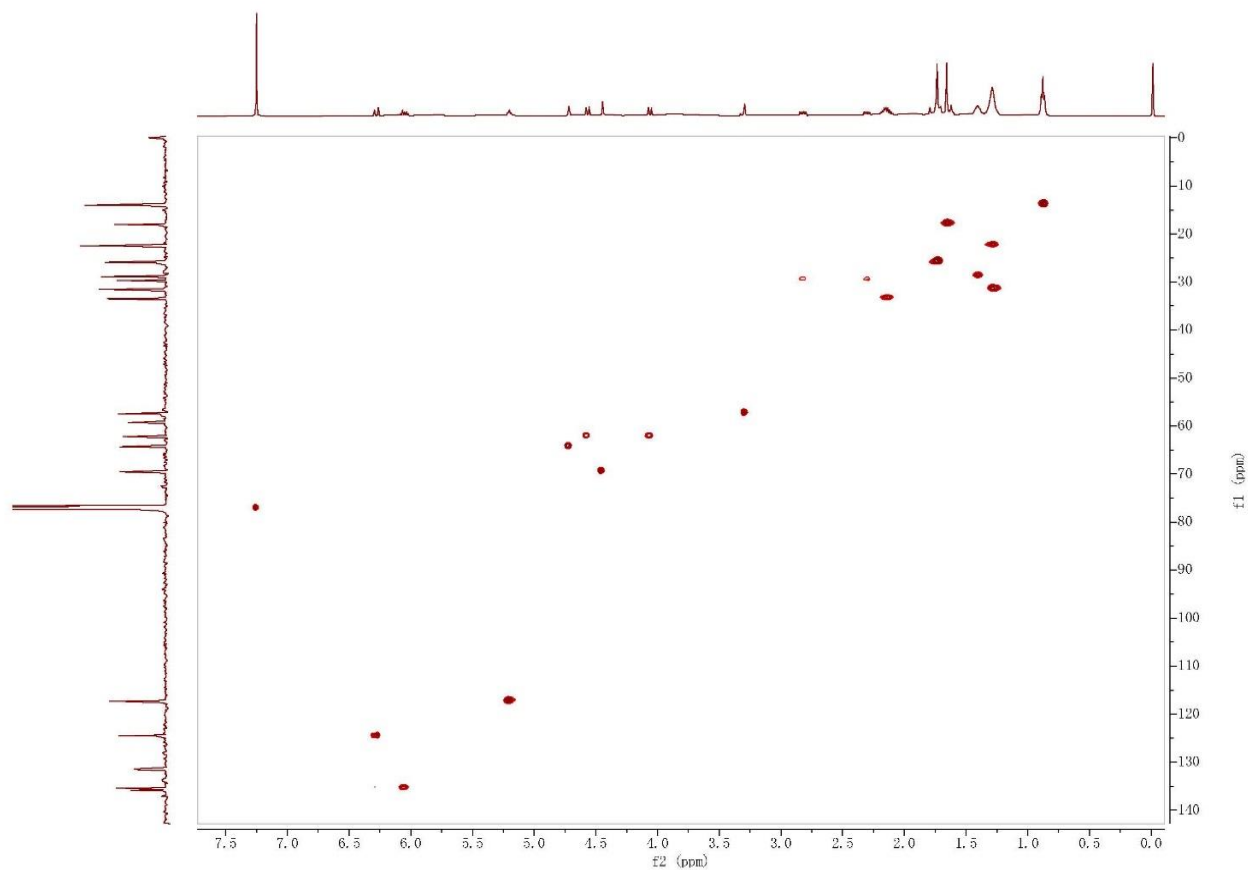

S20. COSY spectrum of cytosporin X (**2**) in CDCl<sub>3</sub>.

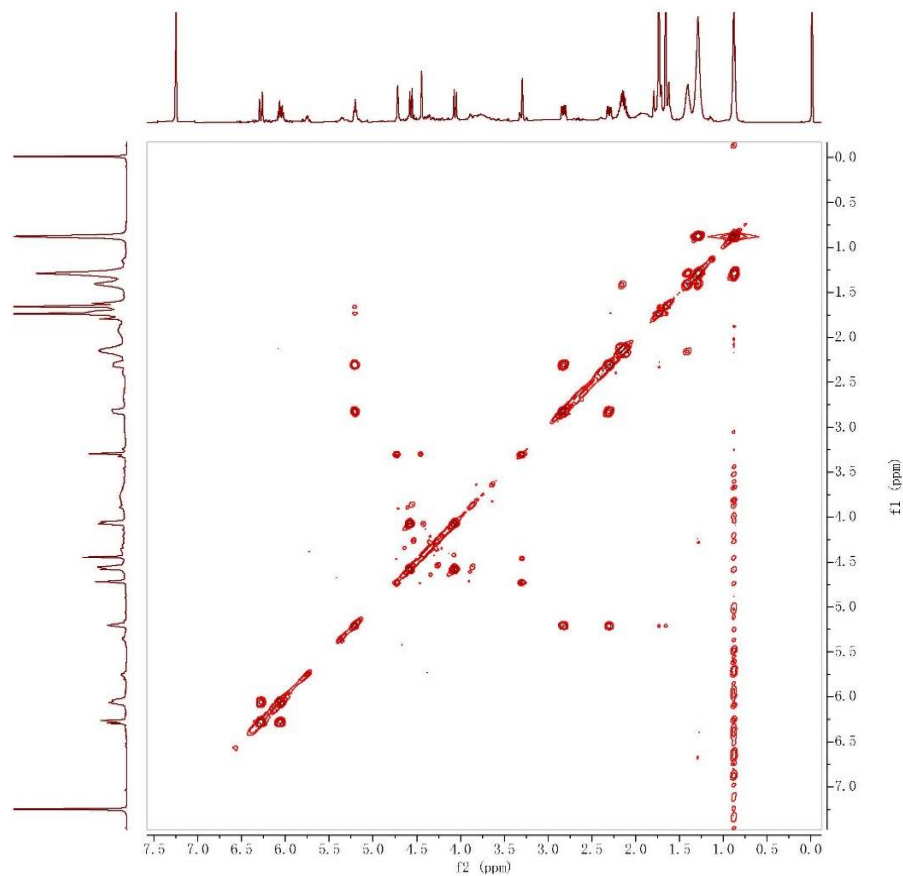

S21. HMBC spectrum of cytosporin X (2) in CDCl<sub>3</sub>.

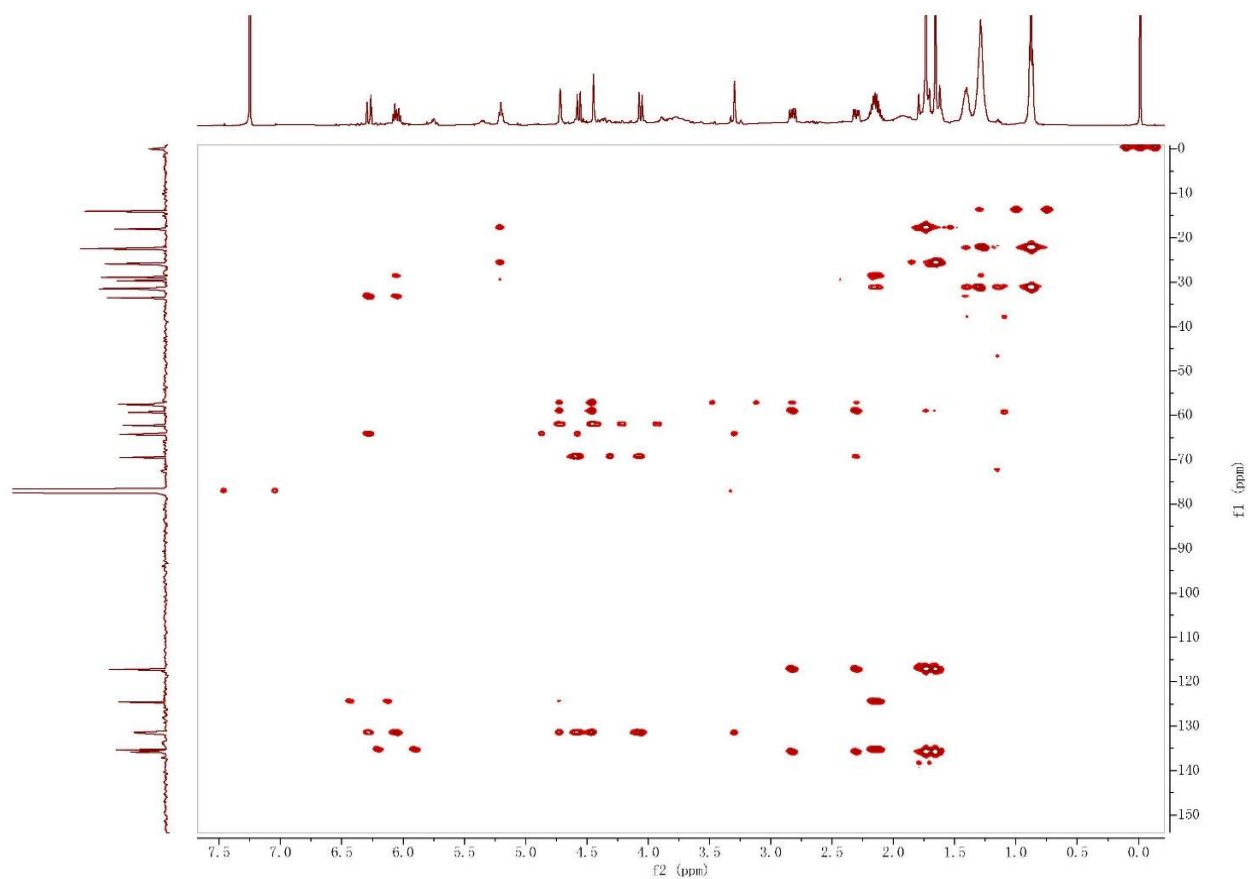

S22. NOESY spectrum of cytosporin X (2) in CDCl<sub>3</sub>.

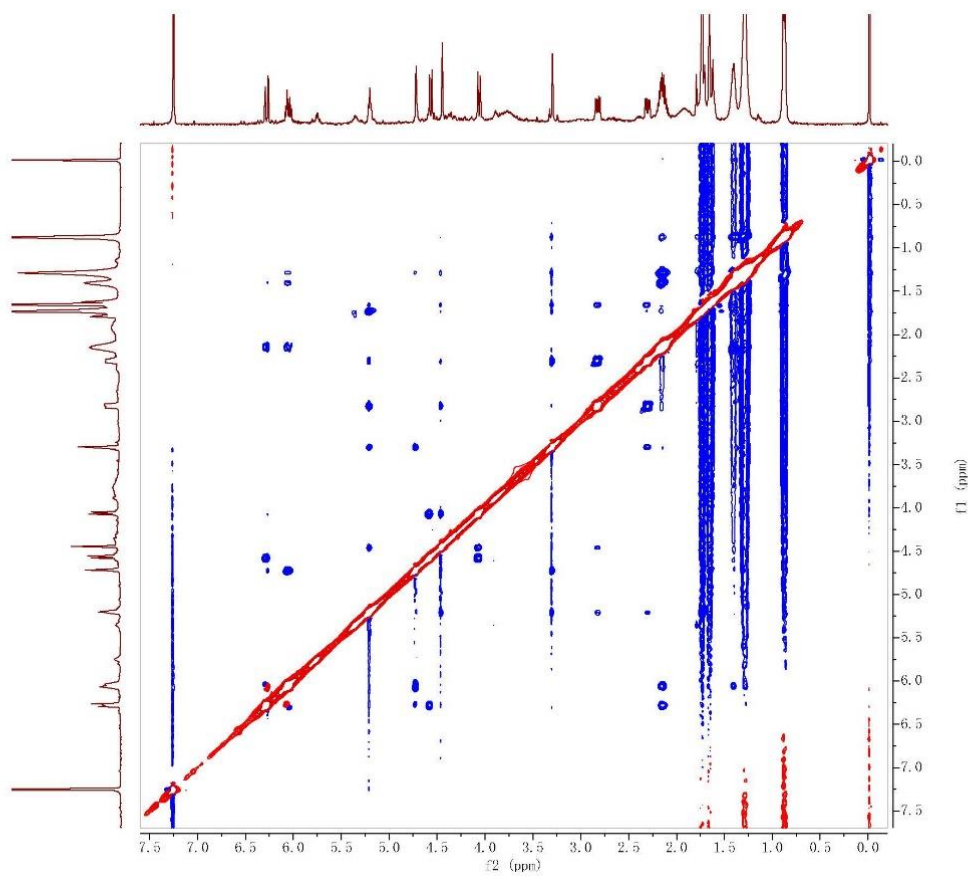



S23. NOESY spectrum of cytosporin X (2) in DMSO-*d*<sub>6</sub>.

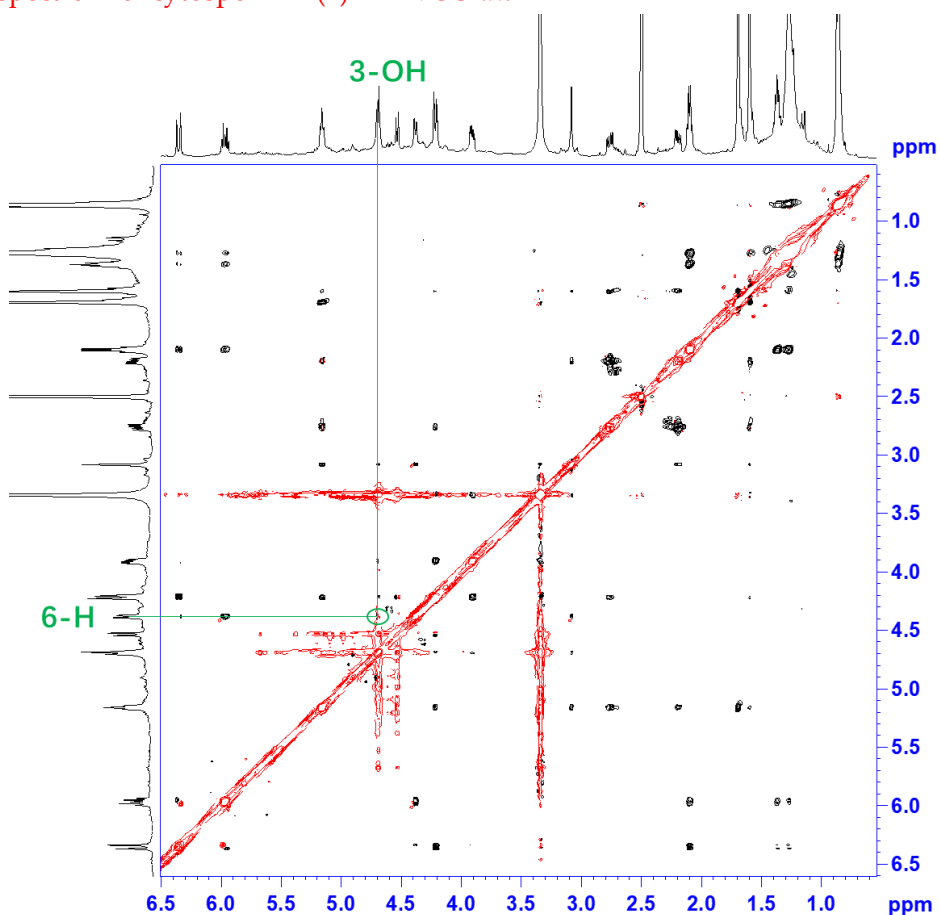

S24. HRESIMS of cytosporin X (2).

## Qualitative Analysis Report

|                               |                   |                      |       |
|-------------------------------|-------------------|----------------------|-------|
| <b>Data Filename</b>          | W-45-NEG.d        | <b>Sample Name</b>   |       |
| <b>Sample Type</b>            | Sample            | <b>Position</b>      | P1-E4 |
| <b>Instrument Name</b>        | Instrument 1      | <b>User Name</b>     |       |
| <b>Acq Method</b>             | SERUM-NEG-15MIN.m | <b>Acquired Time</b> |       |
| <b>IRM Calibration Status</b> | Success           | <b>DA Method</b>     | E.m   |
| <b>Comment</b>                |                   |                      |       |
| <b>Sample Group</b>           | Info.             |                      |       |
| <b>User Spectra</b>           |                   |                      |       |

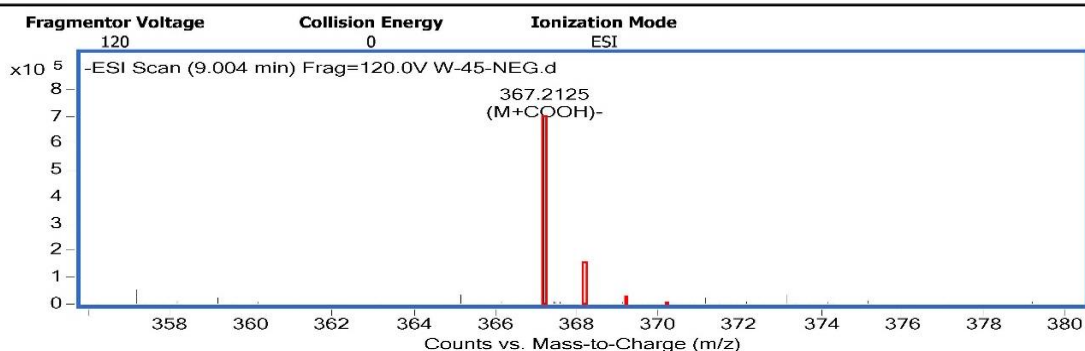

### Formula Calculator Element Limits

| Element | Min | Max |
|---------|-----|-----|
| C       | 0   | 50  |
| H       | 0   | 400 |
| O       | 0   | 20  |

### Formula Calculator Results

| Formula    | Best | Mass     | Tgt Mass | Diff (ppm) | Ion Species | Score |
|------------|------|----------|----------|------------|-------------|-------|
| C20 H31 O6 | TRUE | 367.2125 | 367.2121 | 1.1        | C20 H31 O6  | 97.64 |

--- End Of Report ---

S25. UV spectrum of cytosporin X (2) in MeOH.

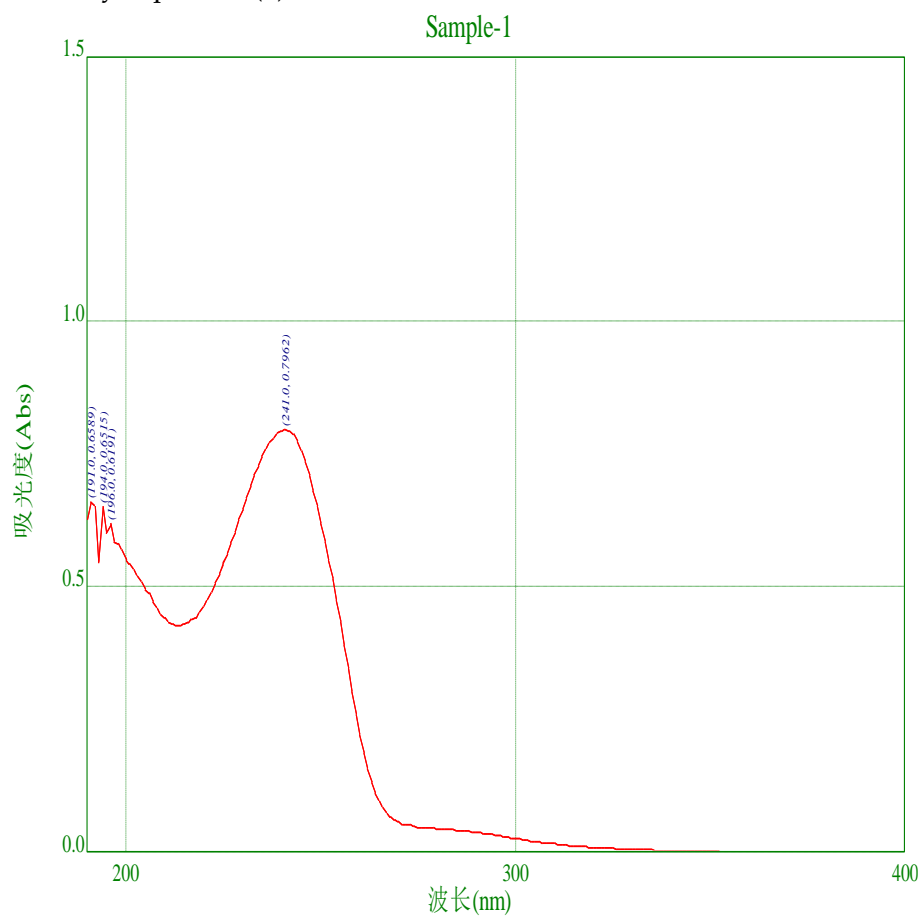

S26 IR spectrum of cytosporin X (2) (KBr).

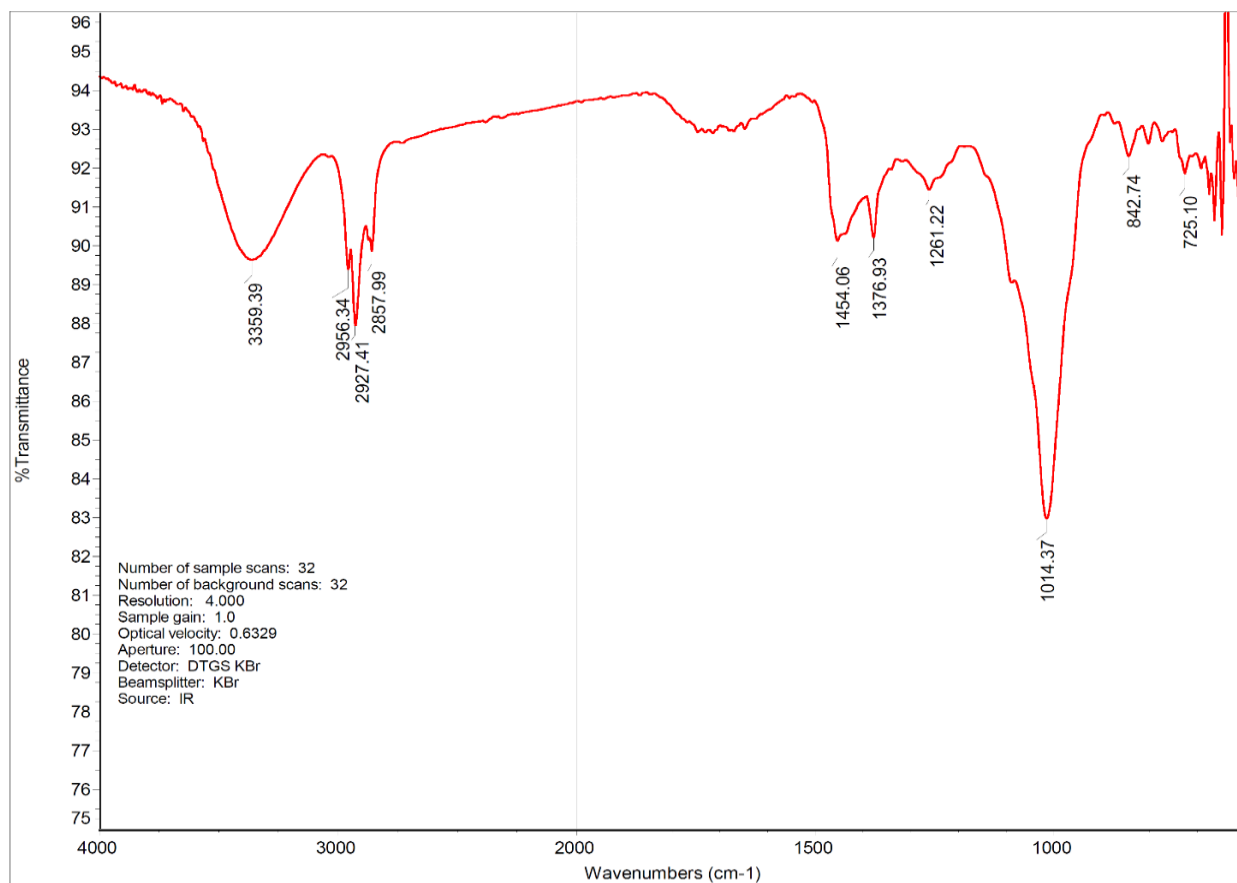

S27.  $^1\text{H}$  NMR spectrum of cytosporin Y (**3**) in  $\text{CDCl}_3$ .

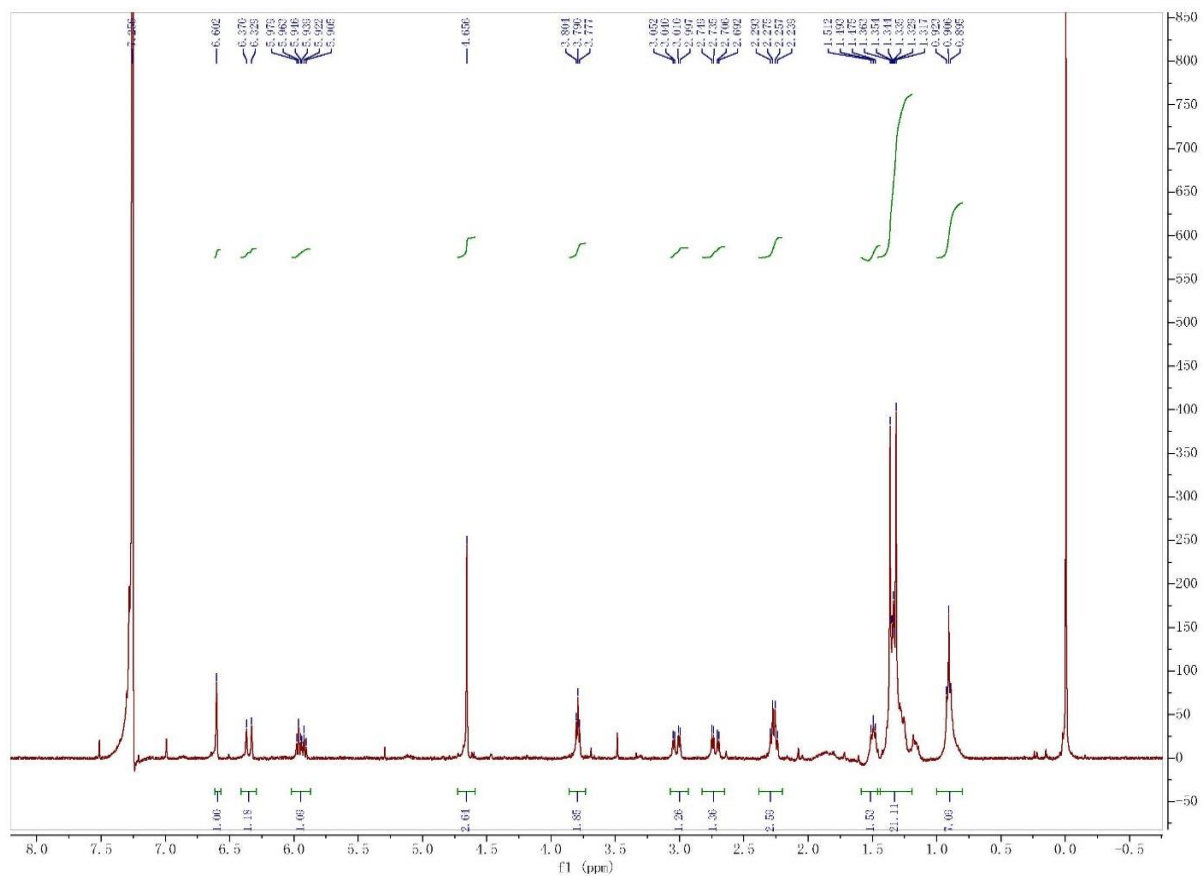

S28.  $^{13}\text{C}$  NMR spectrum of cytosporin Y (**3**) in  $\text{CDCl}_3$ .

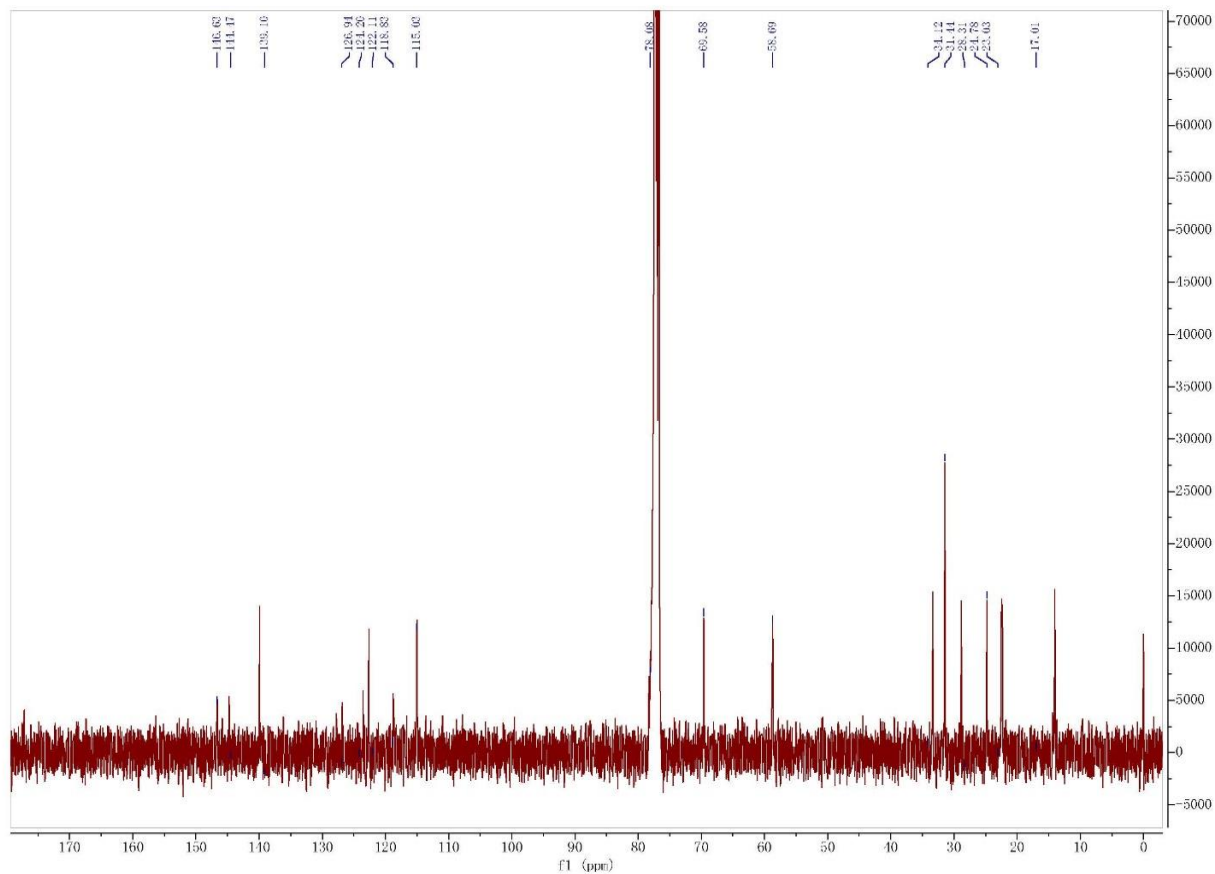

S29. DEPT135 spectrum of cytosporin Y (**3**) in CDCl<sub>3</sub>.

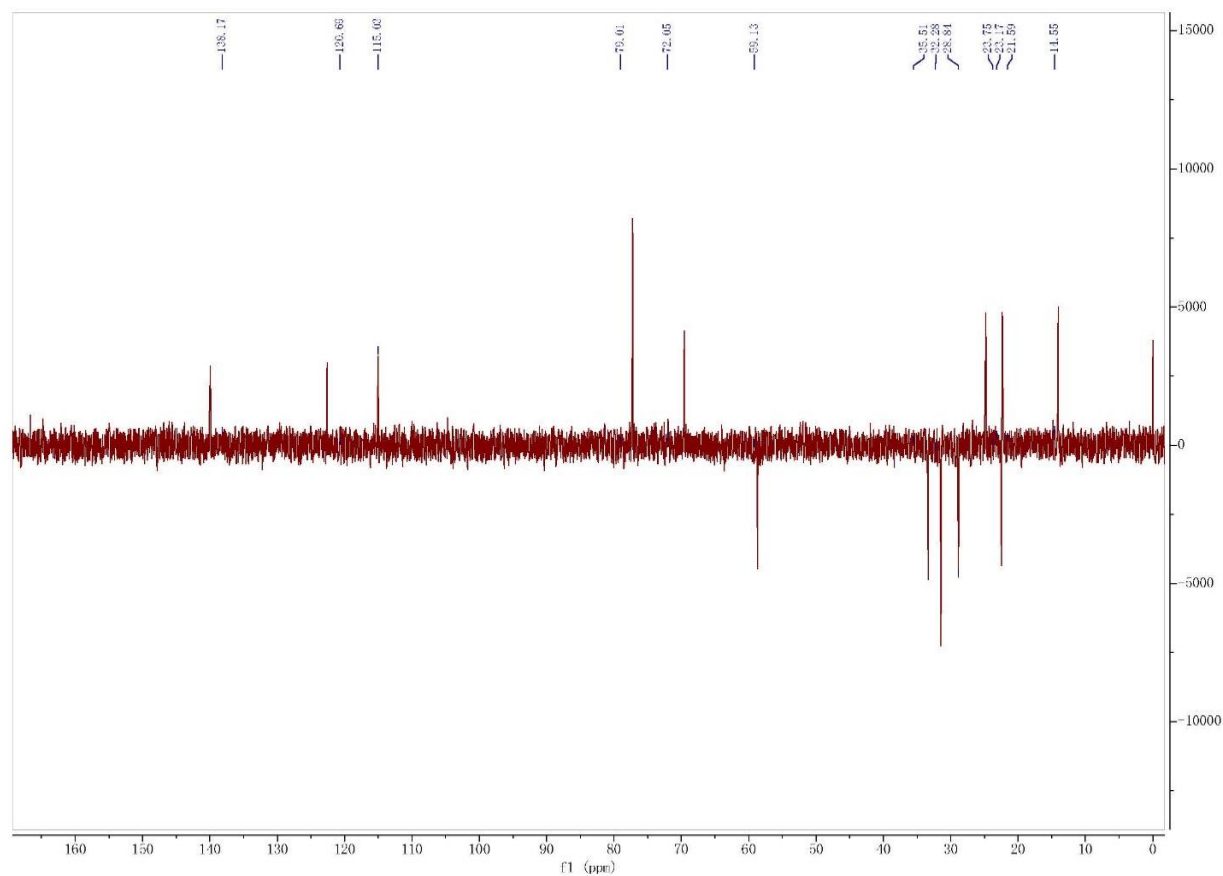

S30. HSQC spectrum of cytosporin Y (**3**) in CDCl<sub>3</sub>.

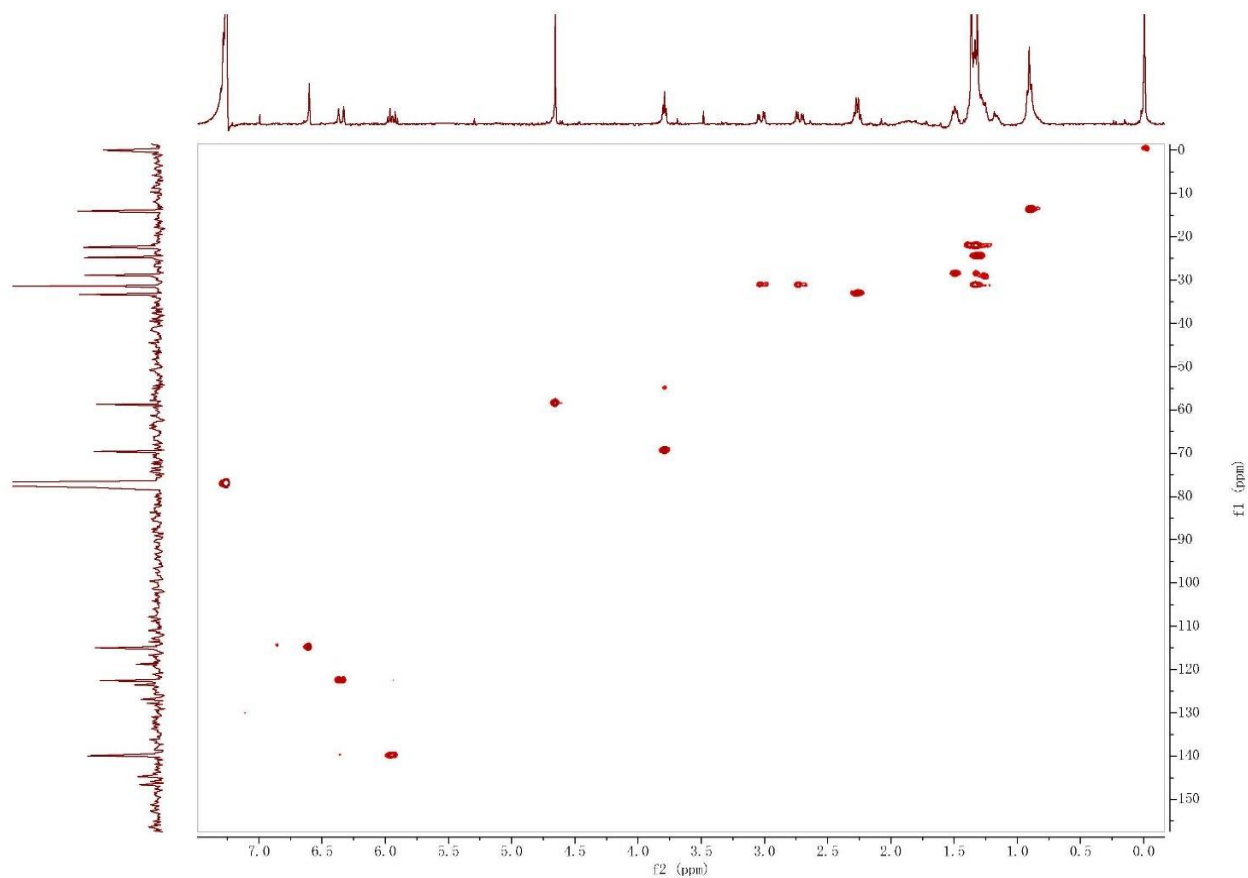

S31. COSY spectrum of cytosporin Y (**3**) in CDCl<sub>3</sub>.

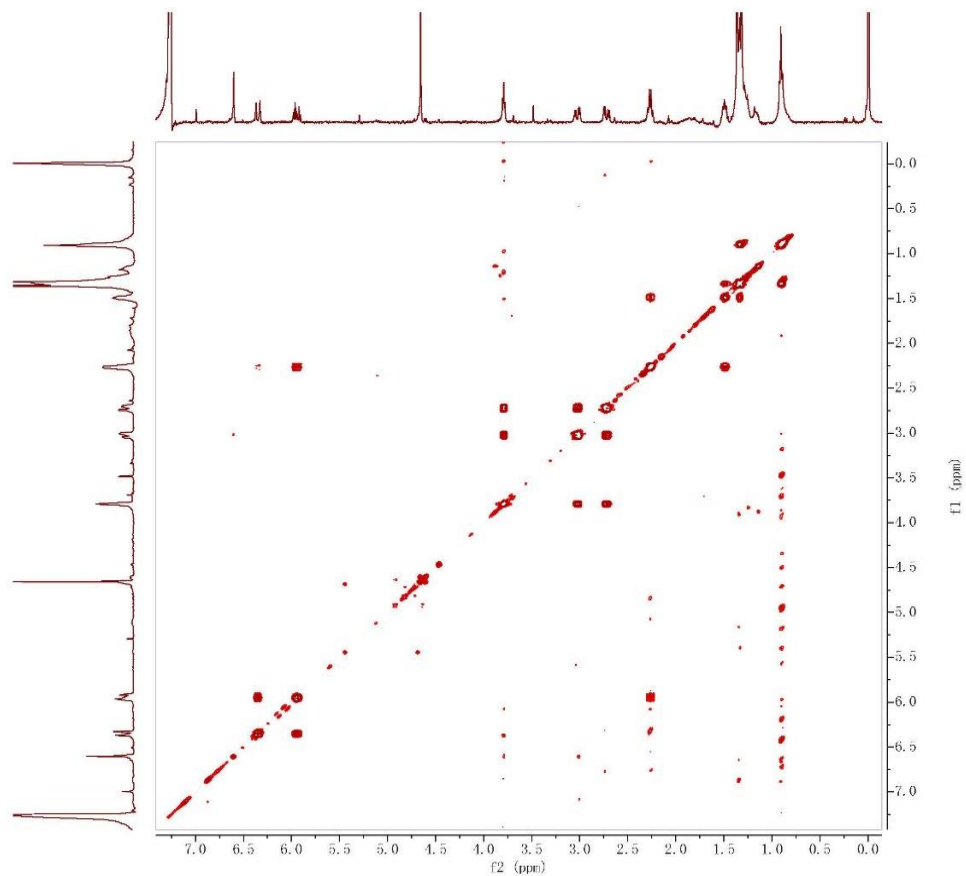

S32. HMBC spectrum of cytosporin Y (**3**) in CDCl<sub>3</sub>.

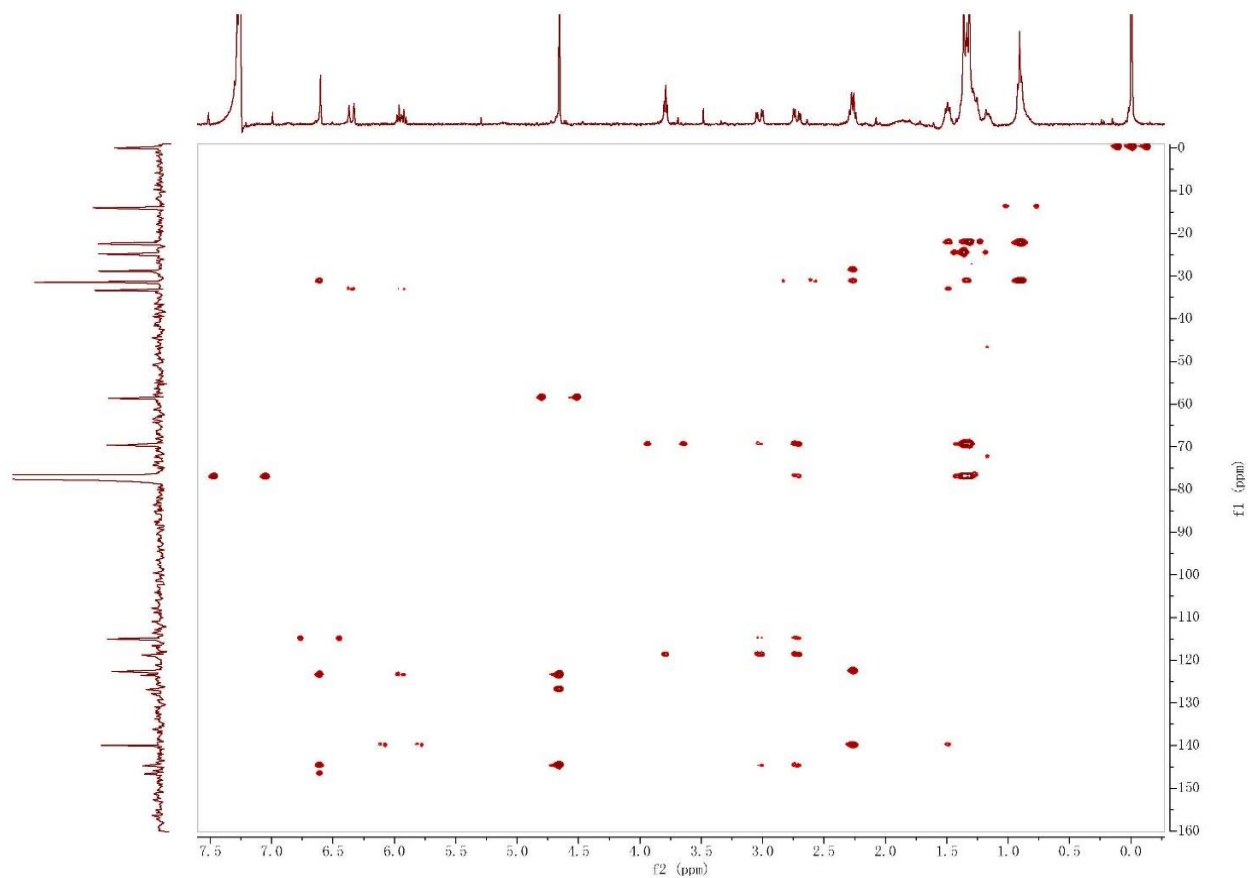

S33. NOESY spectrum of cytosporin Y (3) in CDCl<sub>3</sub>.

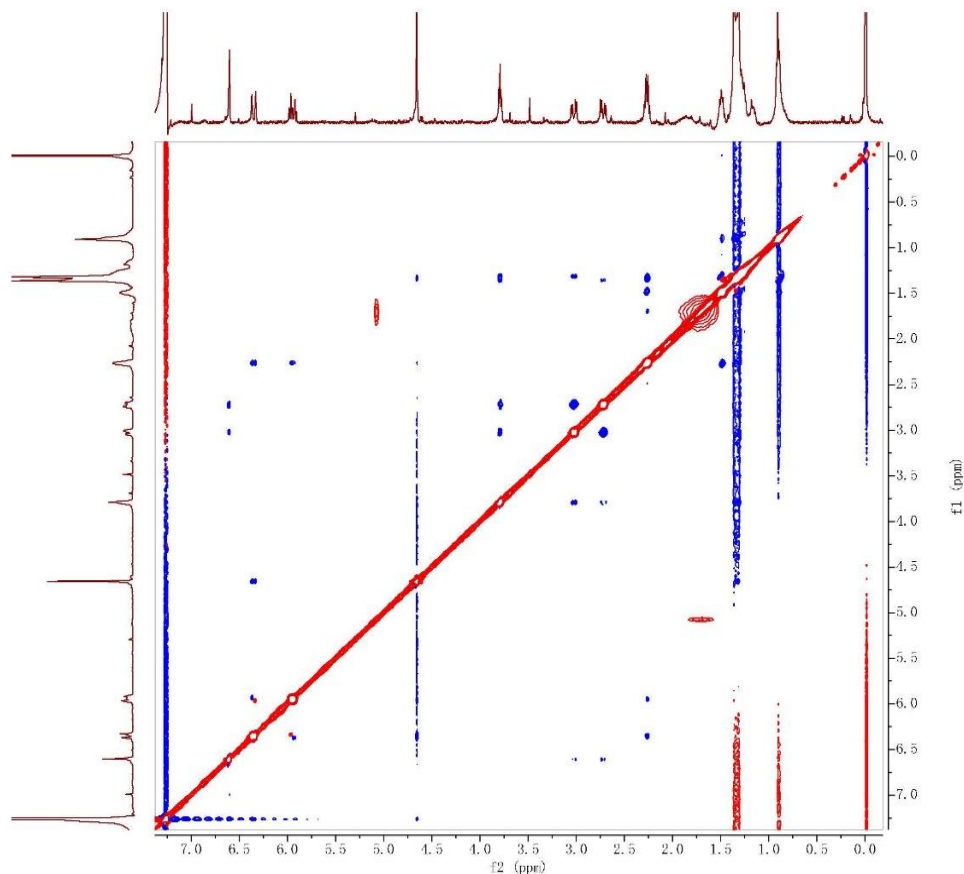

S34. HRESIMS of cytosporin Y (3).

### Qualitative Analysis Report

|                               |                   |                      |        |
|-------------------------------|-------------------|----------------------|--------|
| <b>Data Filename</b>          | W-55-NEG.d        | <b>Sample Name</b>   |        |
| <b>Sample Type</b>            | Sample            | <b>Position</b>      | Vial 9 |
| <b>Instrument Name</b>        | Instrument 1      | <b>User Name</b>     |        |
| <b>Acq Method</b>             | SERUM-NEG-15MIN.m | <b>Acquired Time</b> |        |
| <b>IRM Calibration Status</b> |                   | <b>DA Method</b>     | E.m    |
| <b>Sample Group</b>           | Info.             |                      |        |

#### User Spectra

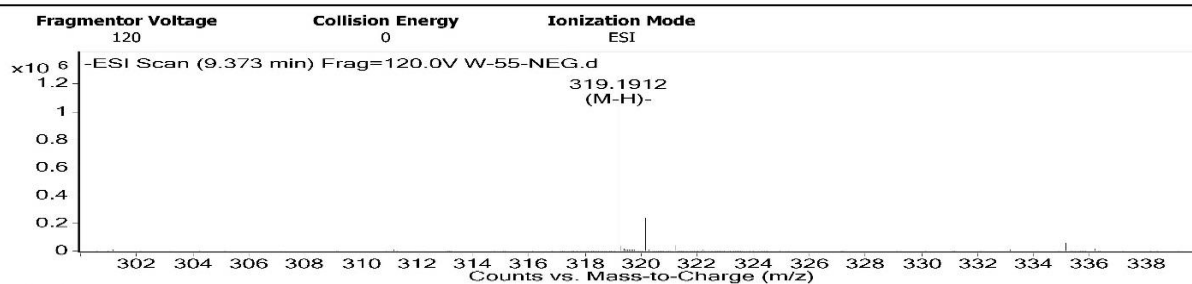

#### Peak List

| m/z      | z | Abund    | Formula                                        | Ion    |
|----------|---|----------|------------------------------------------------|--------|
| 319.1912 | 1 | 1248103  | C <sub>19</sub> H <sub>27</sub> O <sub>4</sub> | (M-H)- |
| 320.1954 | 1 | 235904.6 | C <sub>19</sub> H <sub>27</sub> O <sub>4</sub> | (M-H)- |
| 469.208  | 1 | 624315.1 |                                                |        |
| 470.2118 | 1 | 152830.9 |                                                |        |
| 743.4017 |   | 143111.5 |                                                |        |

#### Formula Calculator Element Limits

| Element | Min | Max |
|---------|-----|-----|
| C       | 0   | 200 |
| H       | 0   | 400 |
| O       | 0   | 17  |

#### Formula Calculator Results

| Formula                                        | Best | Mass     | Tgt Mass | Diff (ppm) | Ion Species                                    | Score |
|------------------------------------------------|------|----------|----------|------------|------------------------------------------------|-------|
| C <sub>19</sub> H <sub>27</sub> O <sub>4</sub> | TRUE | 319.1912 | 319.1909 | 0.94       | C <sub>19</sub> H <sub>27</sub> O <sub>4</sub> | 98.02 |

--- End Of Report ---

S35. UV spectrum of cytosporin Y (3) in MeOH.

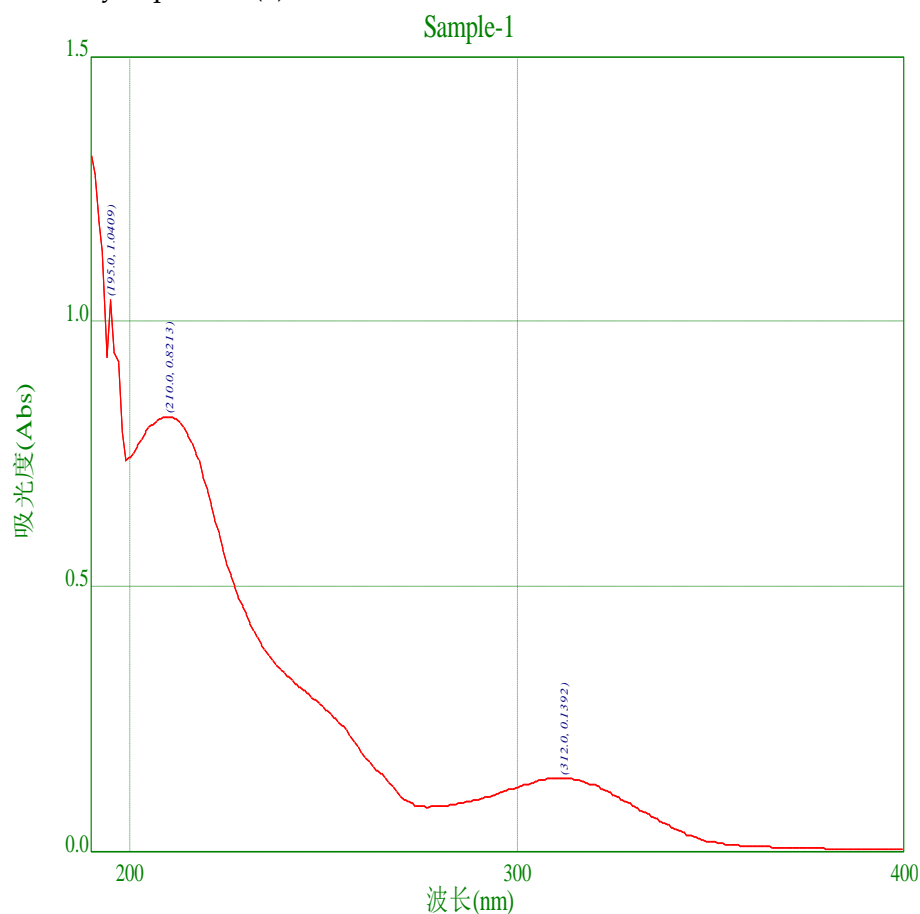

S36. IR spectrum of cytosporin Y (3) (KBr).

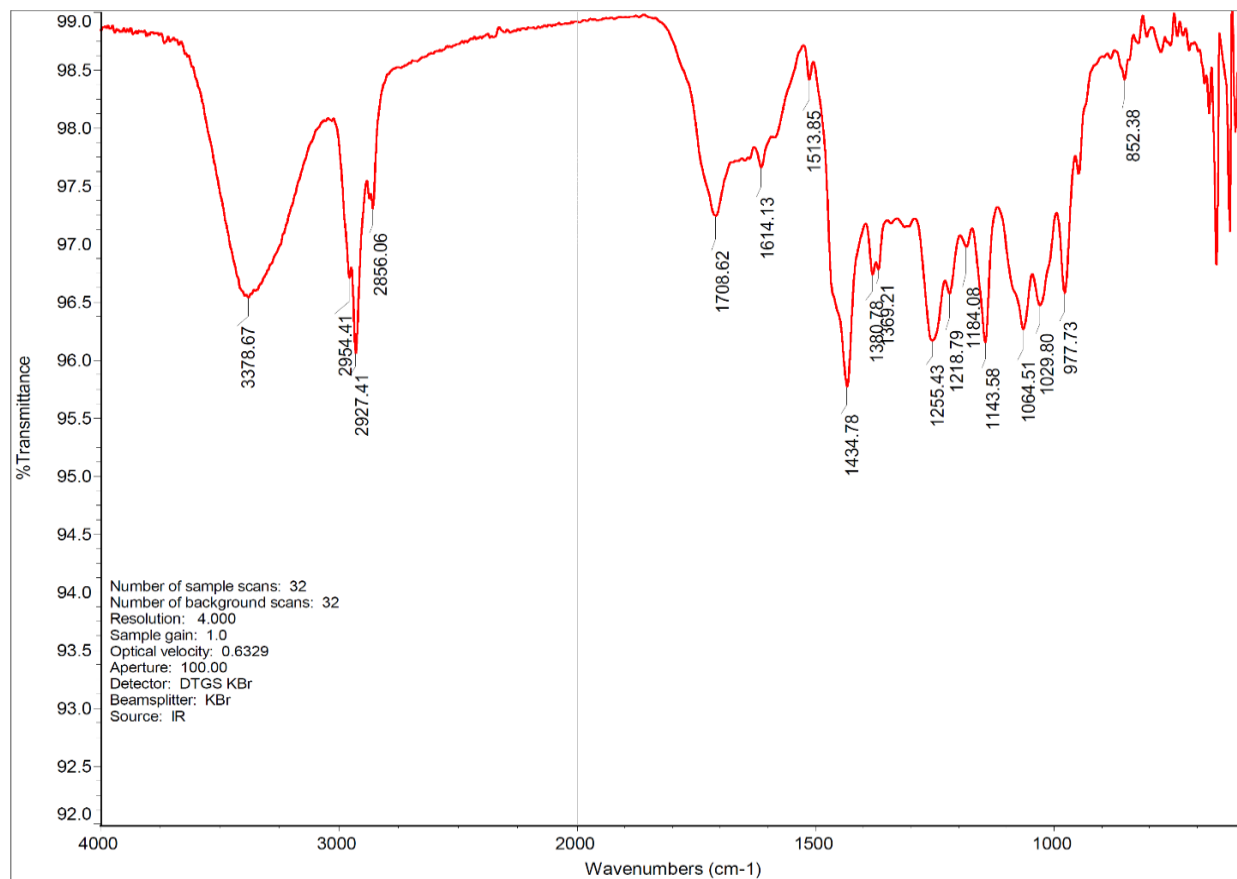

S37.  $^1\text{H}$  NMR spectrum of cytosporin Y<sub>1</sub> (**4**) in MeOD- $d_4$ .

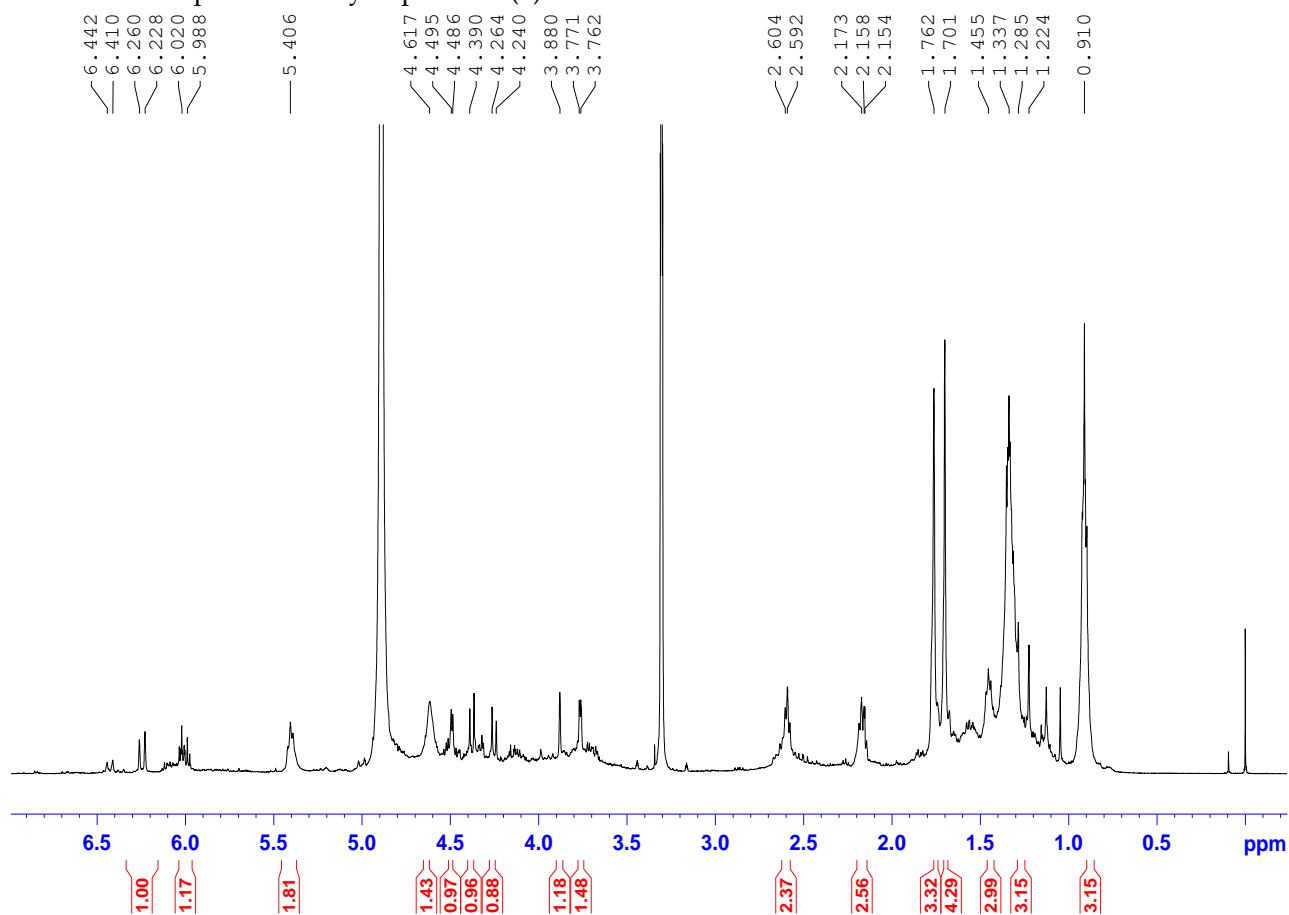

S38.  $^{13}\text{C}$  NMR spectrum of cytosporin Y<sub>1</sub> (**4**) in MeOD- $d_4$ .

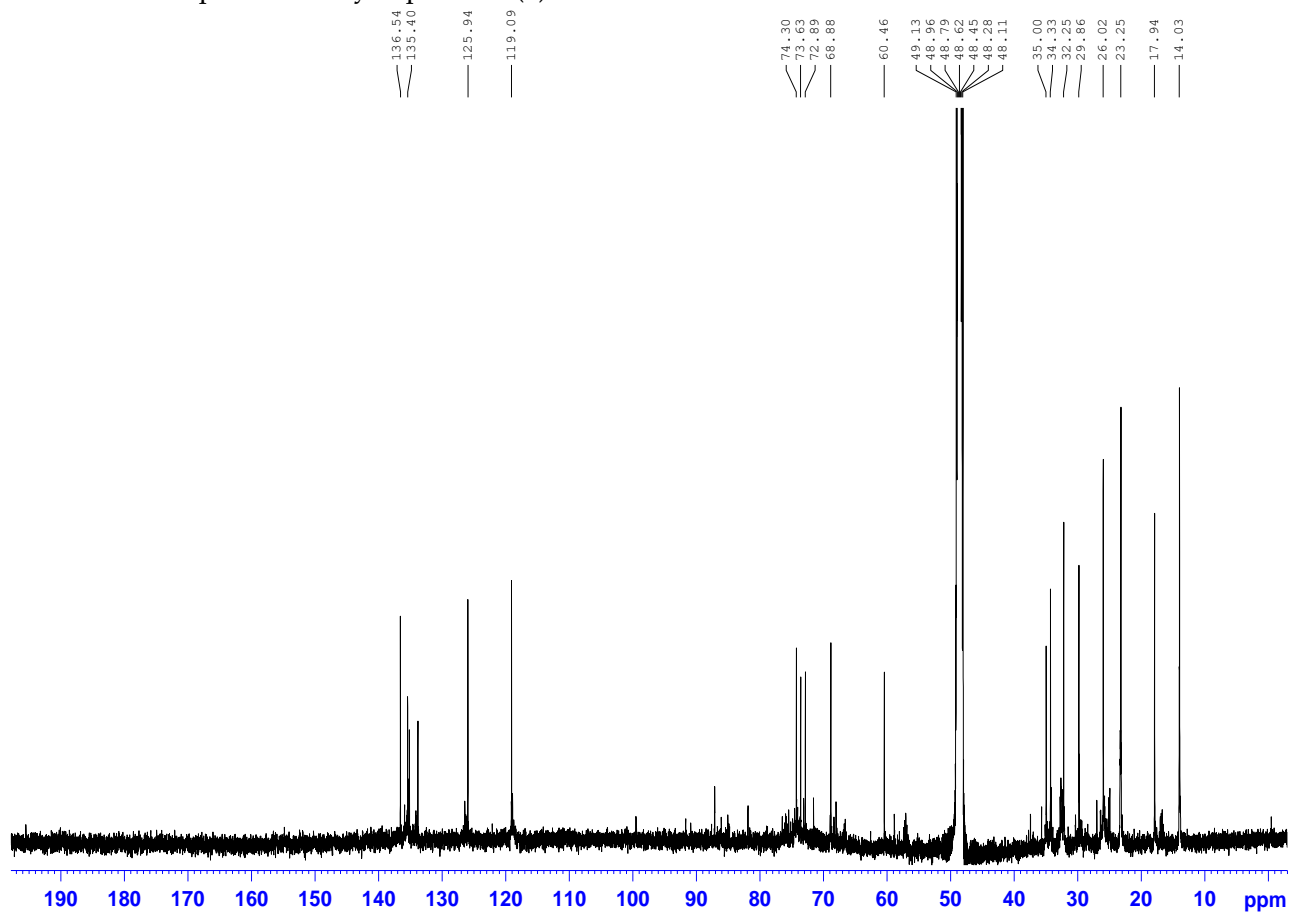



S39. DEPT135 spectrum of cytosporin Y<sub>1</sub> (**4**) in MeOD-*d*<sub>4</sub>.

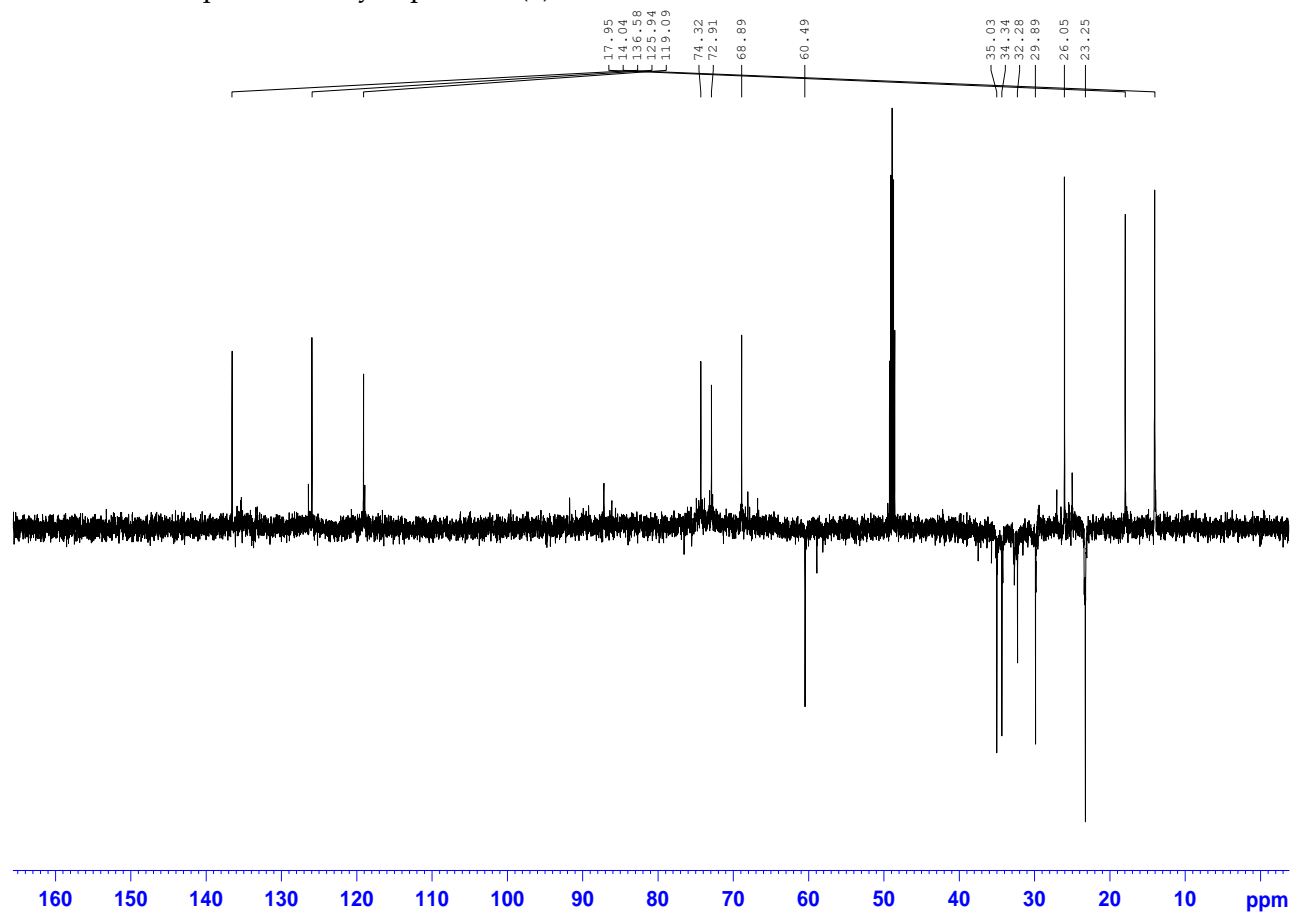

S40. HSQC spectrum of cytosporin Y<sub>1</sub> (**4**) in MeOD-*d*<sub>4</sub>.

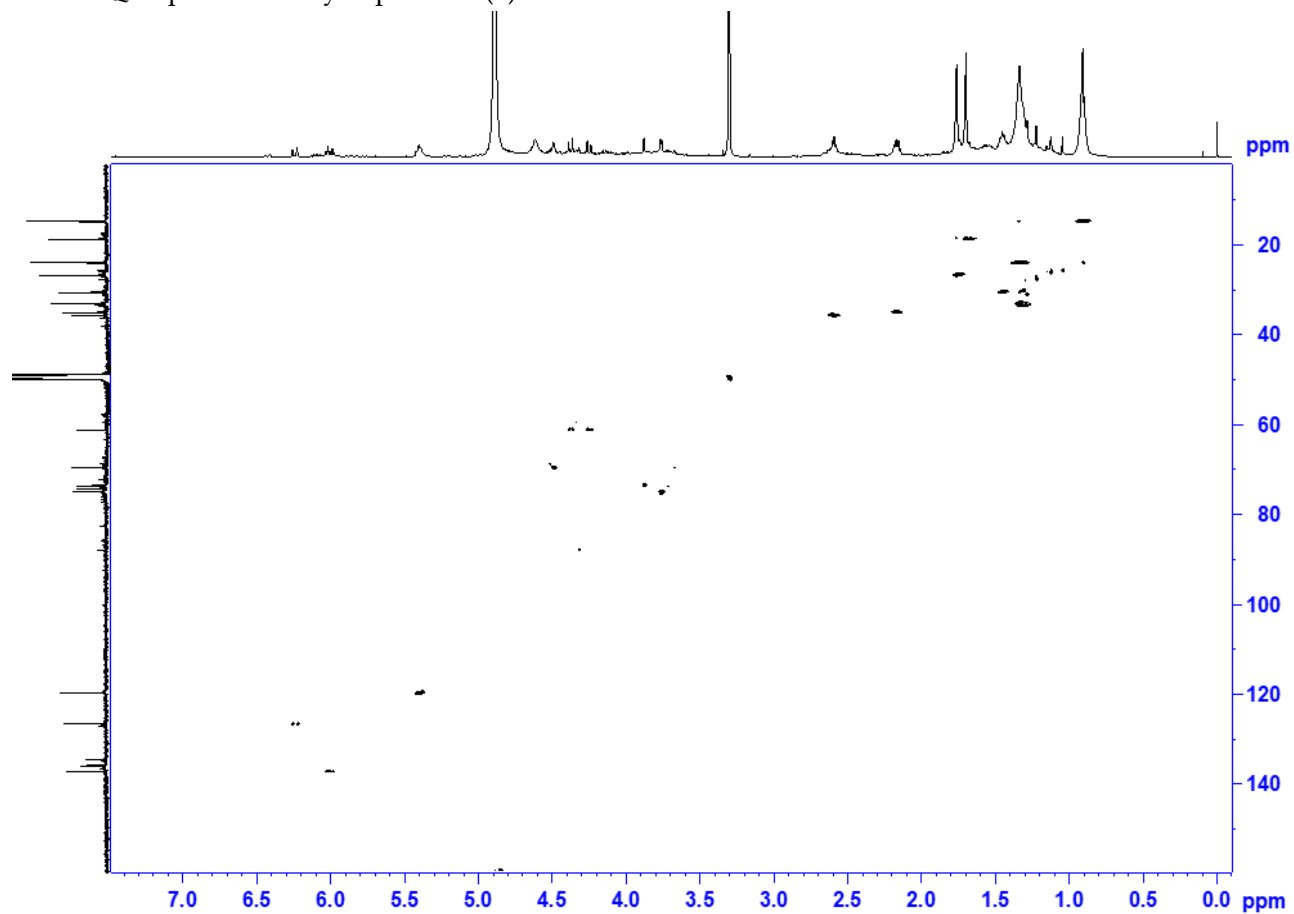

S41. COSY spectrum of cytosporin Y<sub>1</sub> (4) in MeOD-*d*<sub>4</sub>.

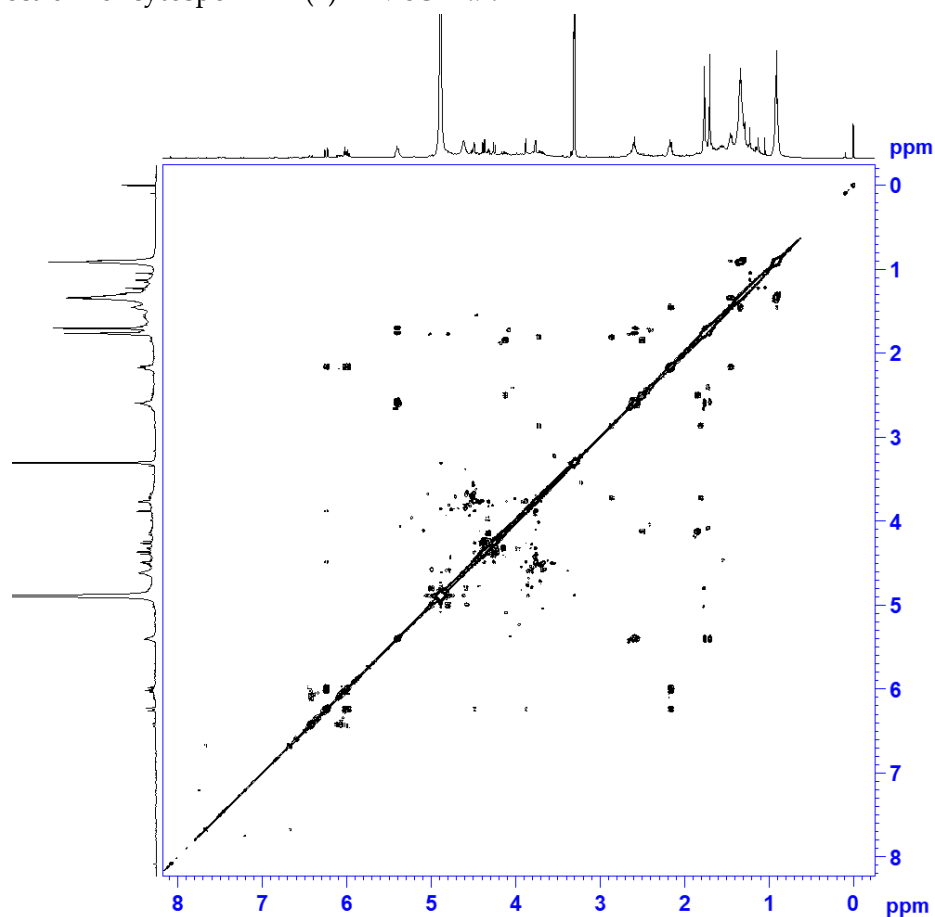

S42. HMBC spectrum of cytosporin Y<sub>1</sub> (4) in MeOD-*d*<sub>4</sub>.

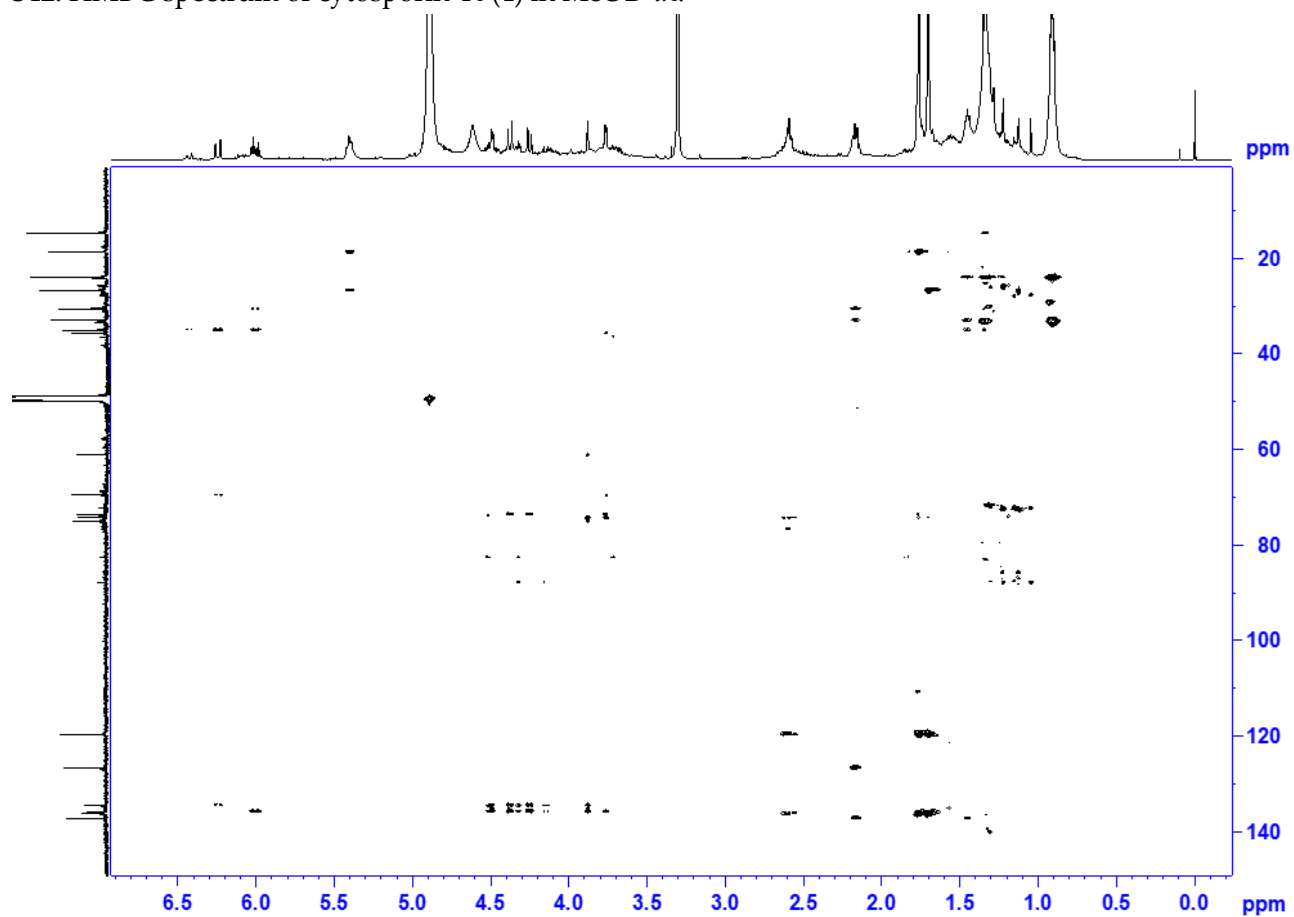

S43. NOESY spectrum of cytosporin Y<sub>1</sub> (4) in MeOD-*d*<sub>4</sub>.

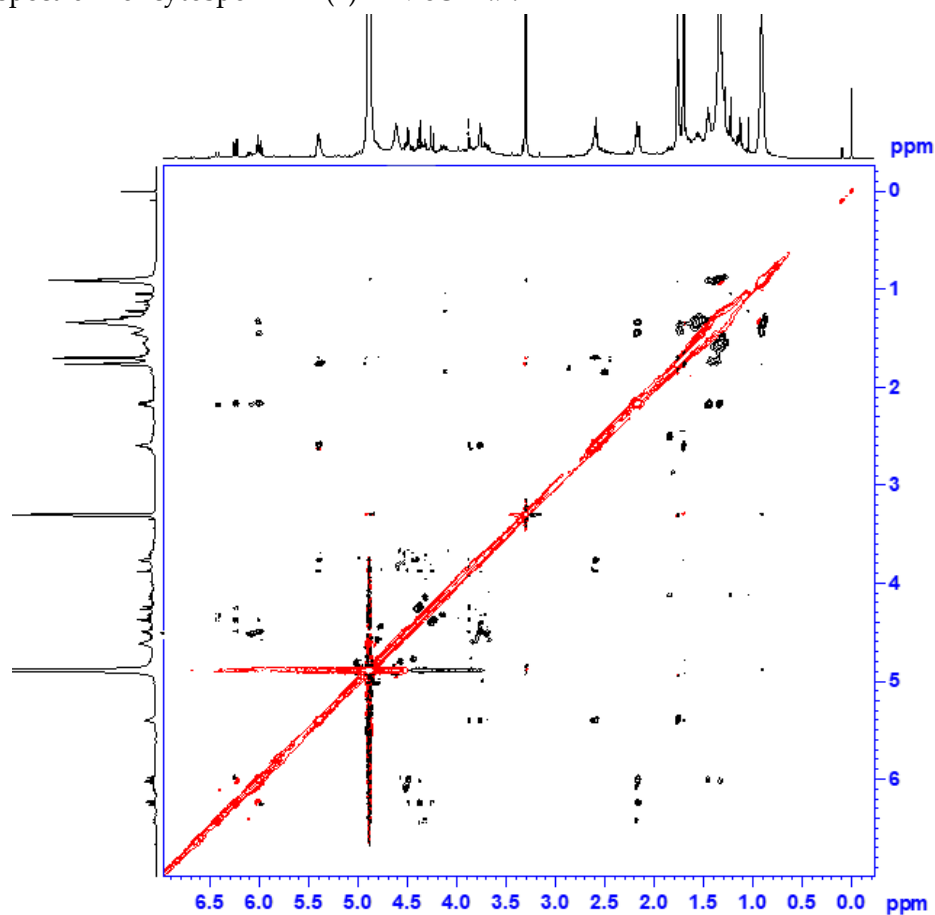

S44. HRESIMS of cytosporin Y<sub>1</sub> (4).

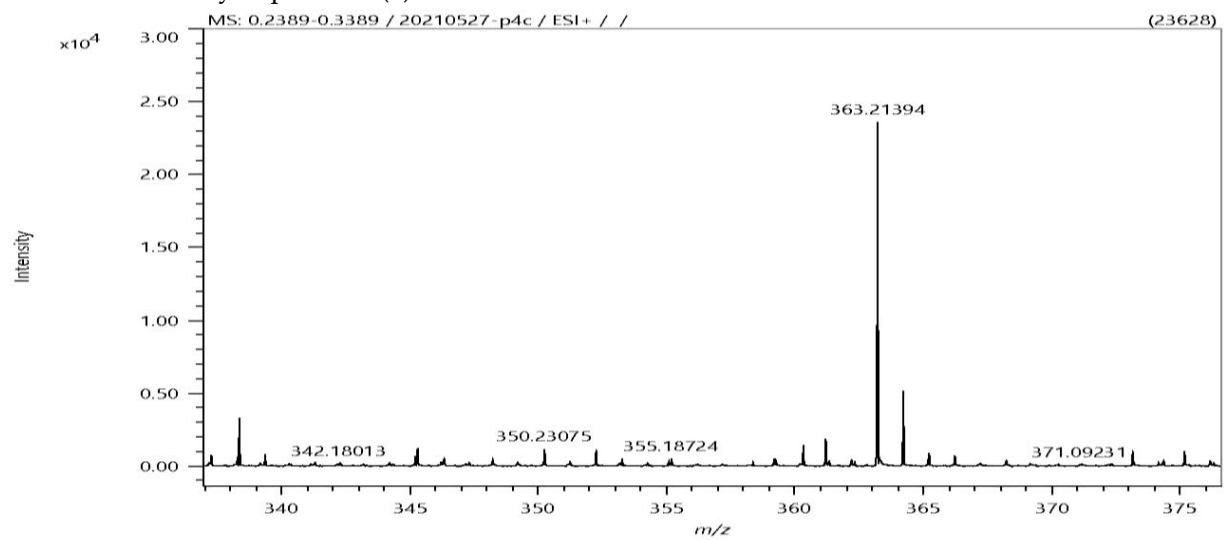

#### Elemental Composition

##### Parameters

Tolerance:  $\pm 5.00$  ppm  
 Electron: Odd/Even  
 Charge: +1  
 DBE: -1.5 - 200.0

##### Elements Set 1:

| Symbol | C   | H   | N | O | Na | S | Cl | Br |
|--------|-----|-----|---|---|----|---|----|----|
| Min    | 0   | 0   | 0 | 0 | 1  | 0 | 0  | 0  |
| Max    | 200 | 200 | 0 | 8 | 1  | 0 | 0  | 0  |

  

| Symbol | F | Si |
|--------|---|----|
| Min    | 0 | 0  |
| Max    | 0 | 0  |

#### Results

| Mass      | Intensity | Intensity [%] | Formula                                           | Calculated Mass | Mass Difference [mDa] | Mass Difference [ppm] | DBE |
|-----------|-----------|---------------|---------------------------------------------------|-----------------|-----------------------|-----------------------|-----|
| 363.21394 | 23628.36  | 30.36         | C <sub>19</sub> H <sub>32</sub> O <sub>5</sub> Na | 363.21420       | -0.25                 | -0.70                 | 3.5 |

S45. UV spectrum of cytosporin Y<sub>1</sub> (**4**) in MeOH.

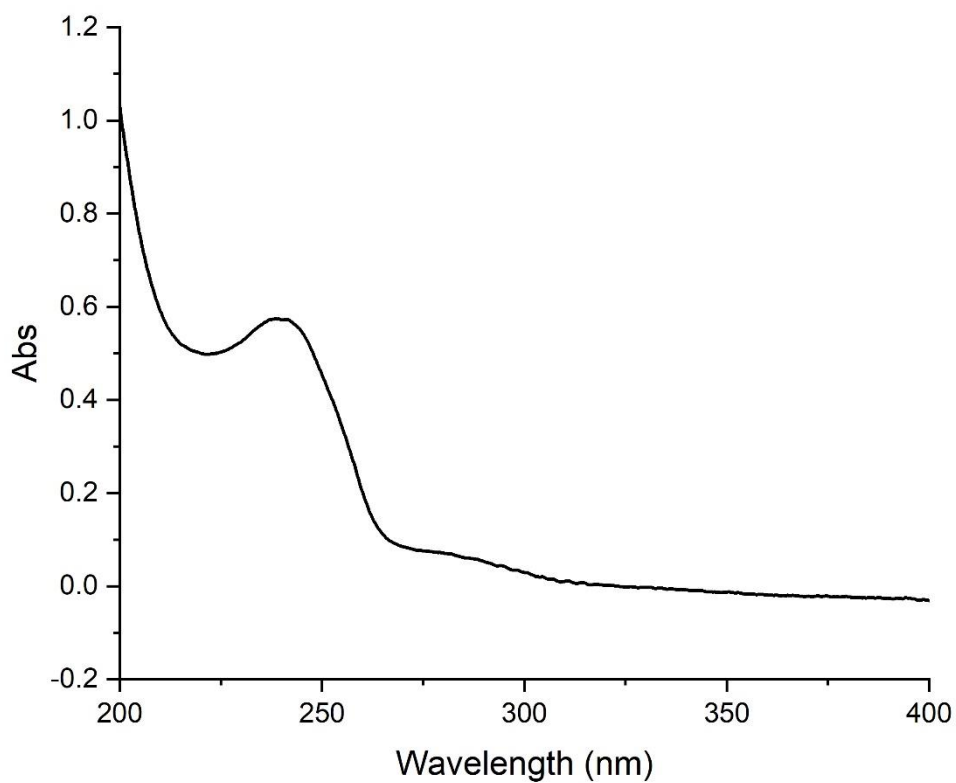

S46. IR spectrum of cytosporin Y<sub>1</sub> (**4**) (KBr).

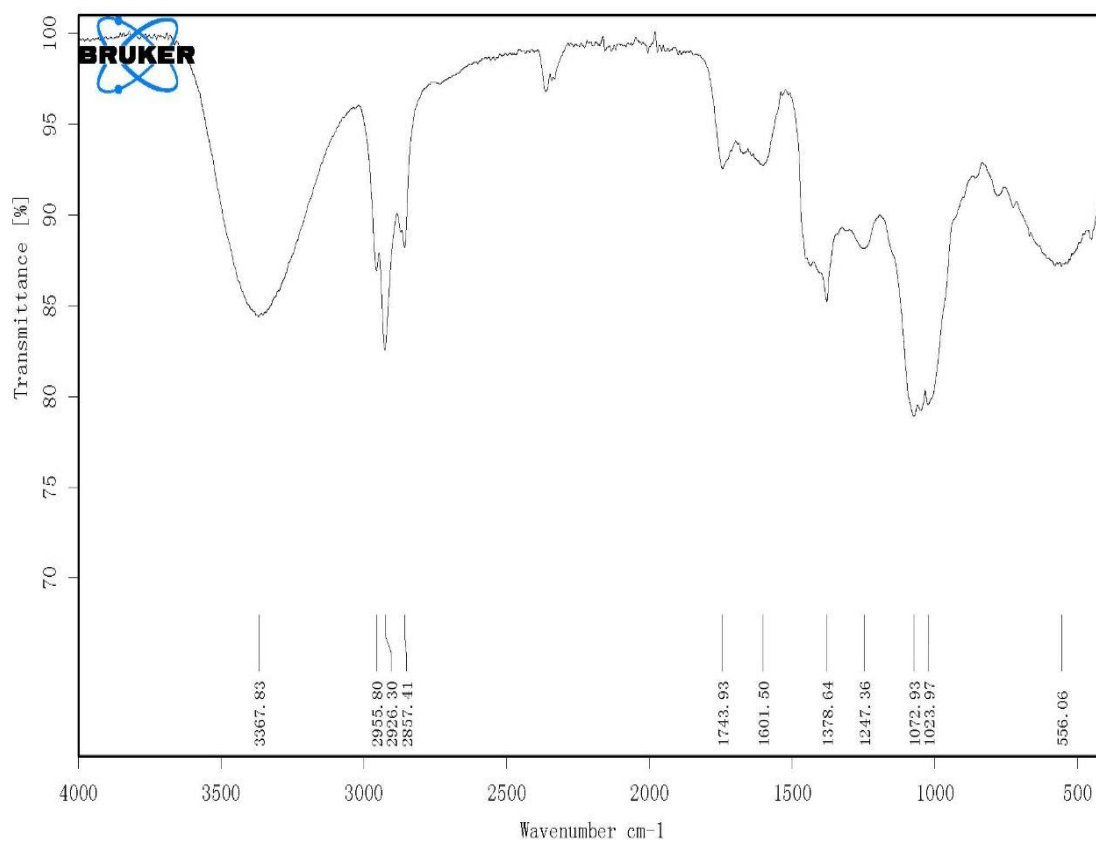

S47.  $^1\text{H}$  NMR spectrum of cytosporin Y<sub>2</sub> (5) in MeOD- $d_4$ .

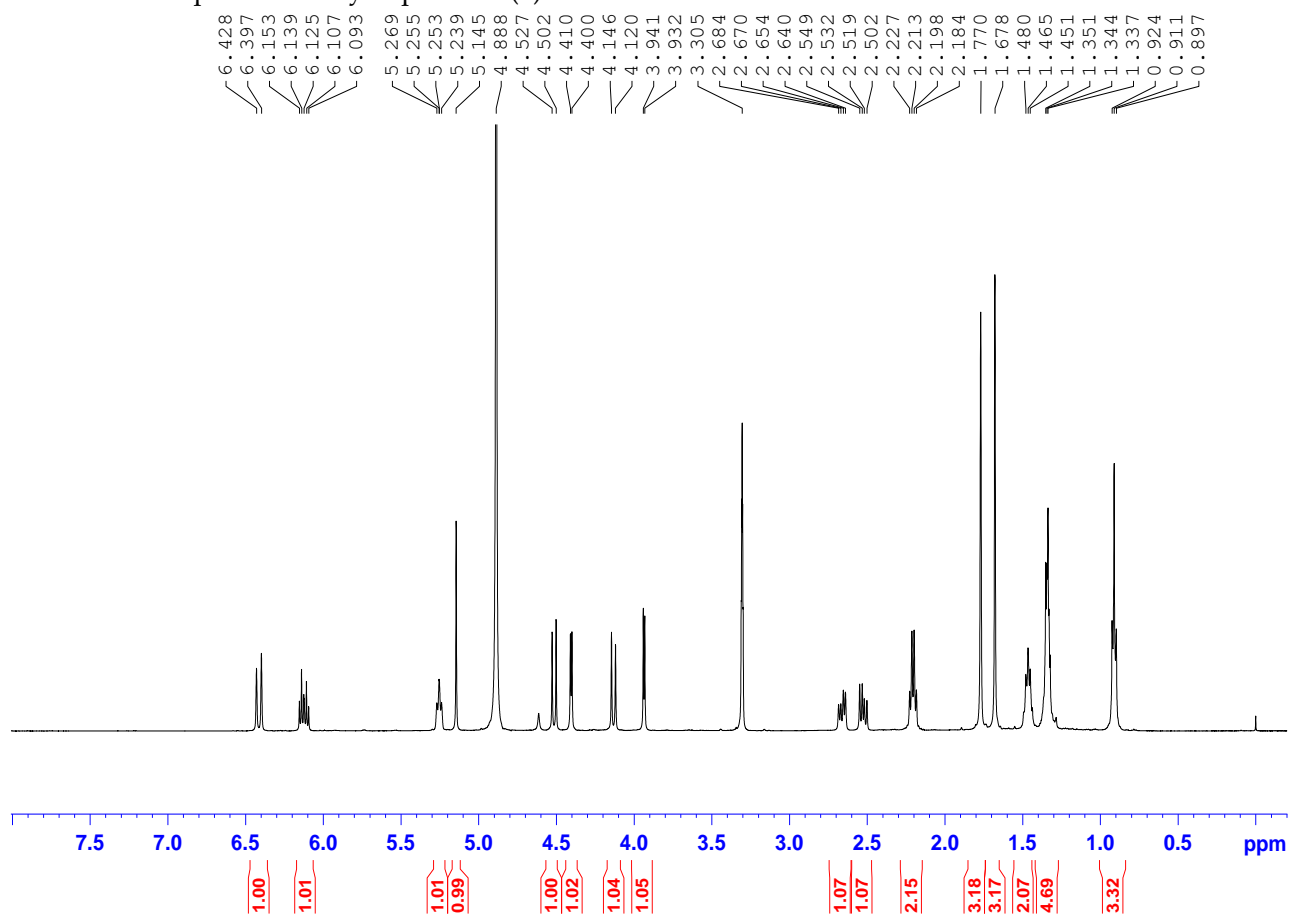

S48.  $^{13}\text{C}$  NMR spectrum of cytosporin Y<sub>2</sub> (5) in MeOD- $d_4$ .

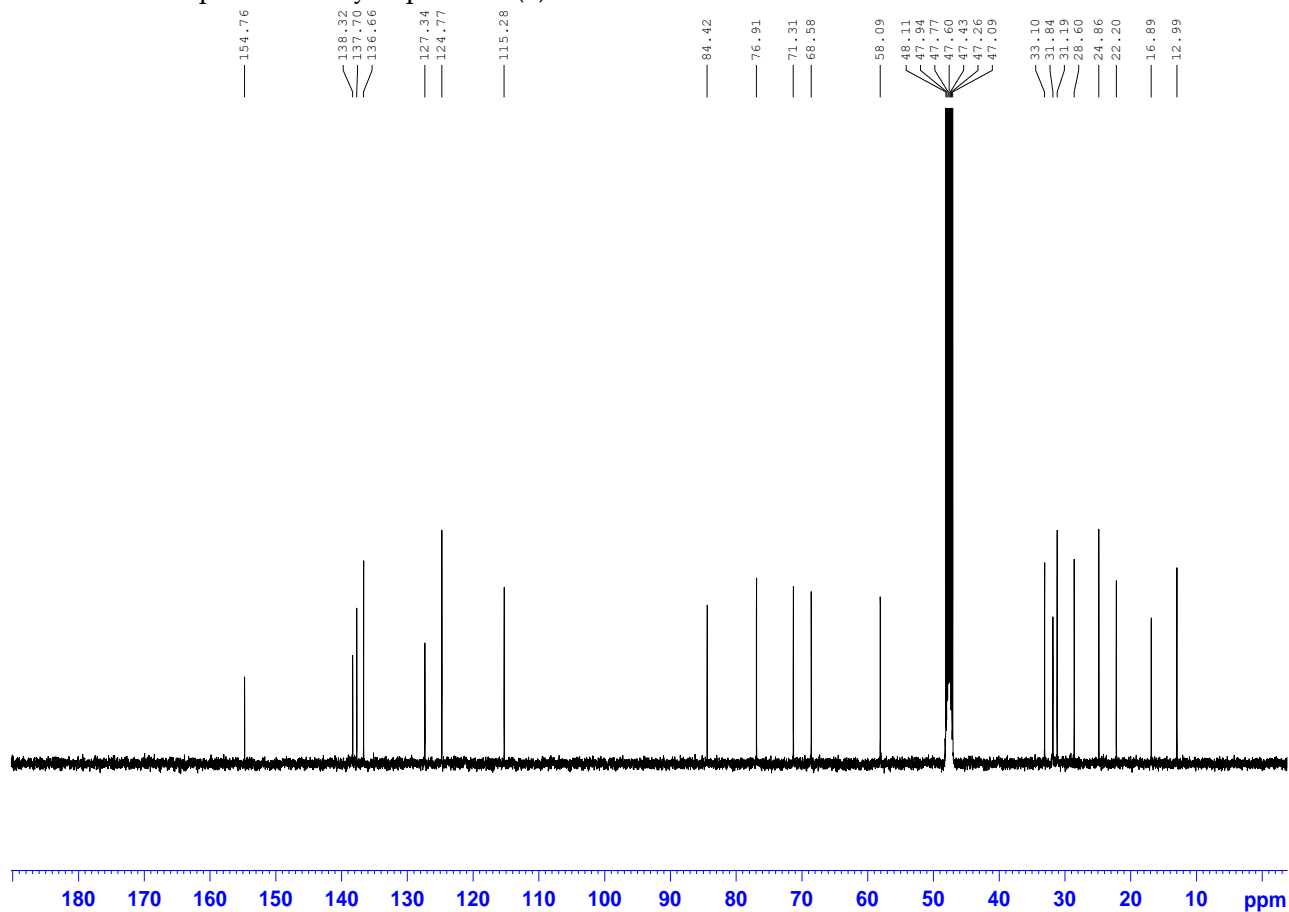

S49. DEPT135 spectrum of cytosporin Y<sub>2</sub> (**5**) in MeOD-*d*<sub>4</sub>.

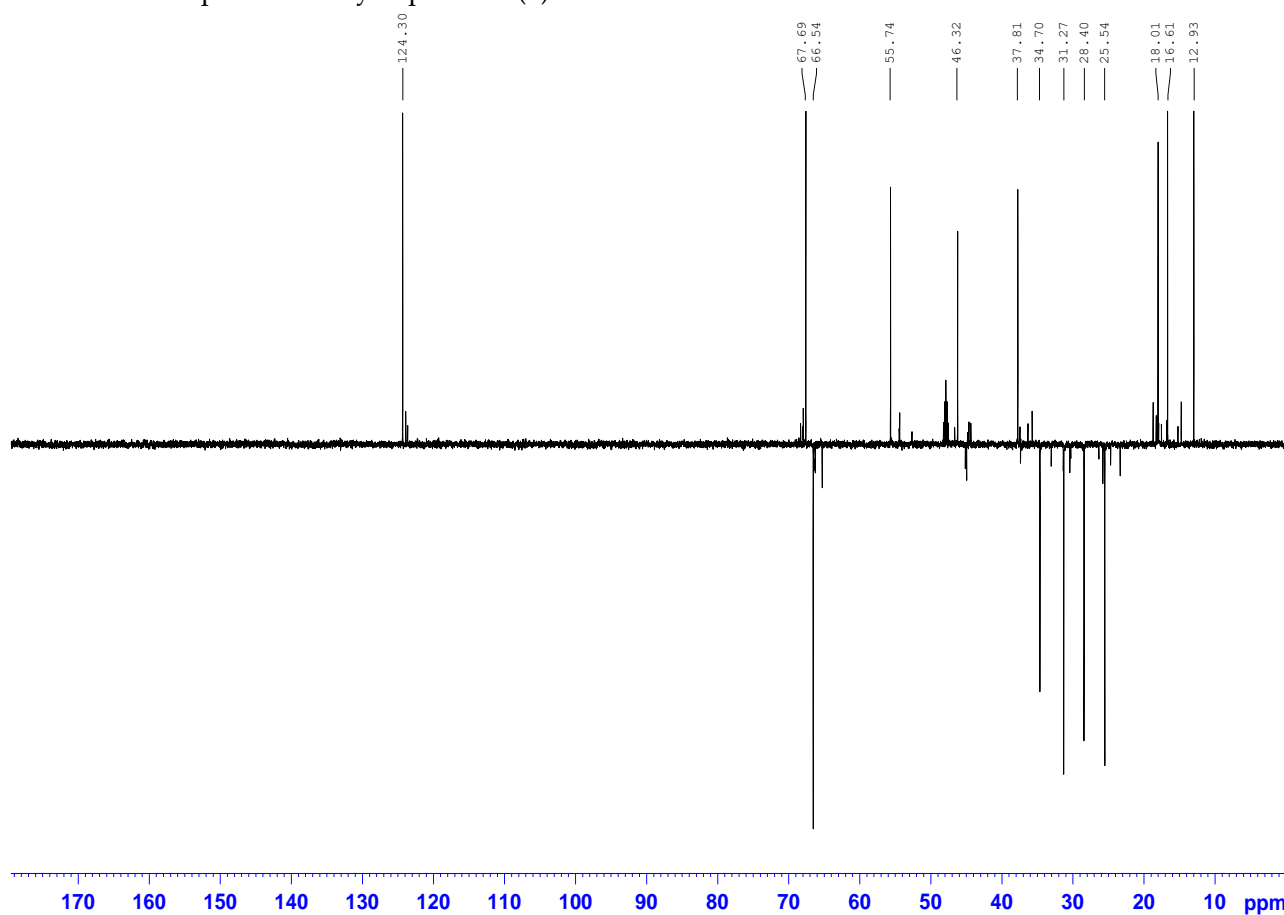

S50. HSQC spectrum of cytosporin Y<sub>2</sub> (**5**) in MeOD-*d*<sub>4</sub>.

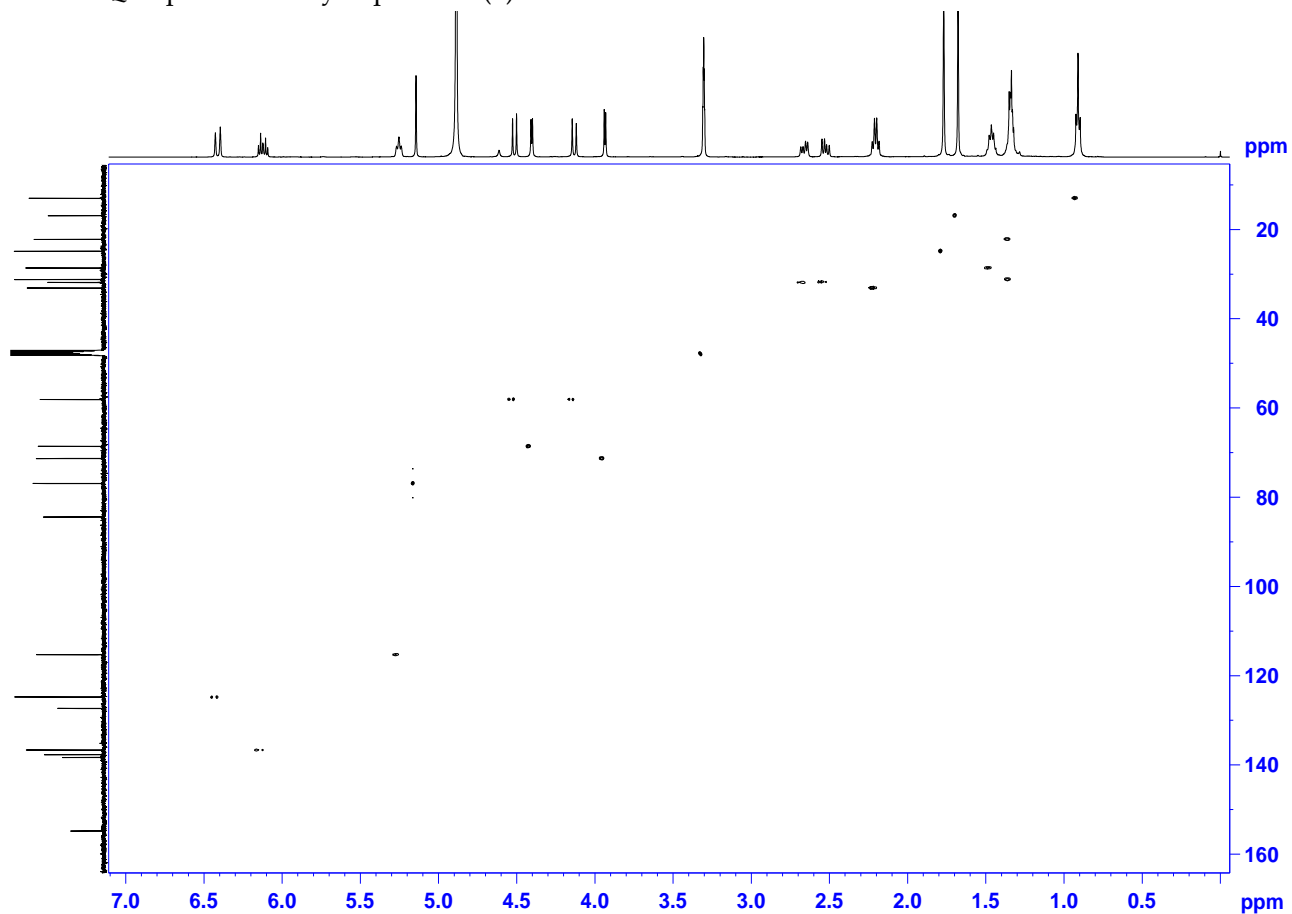

S51. COSY spectrum of cytosporin Y<sub>2</sub> (5) in MeOD-*d*<sub>4</sub>.

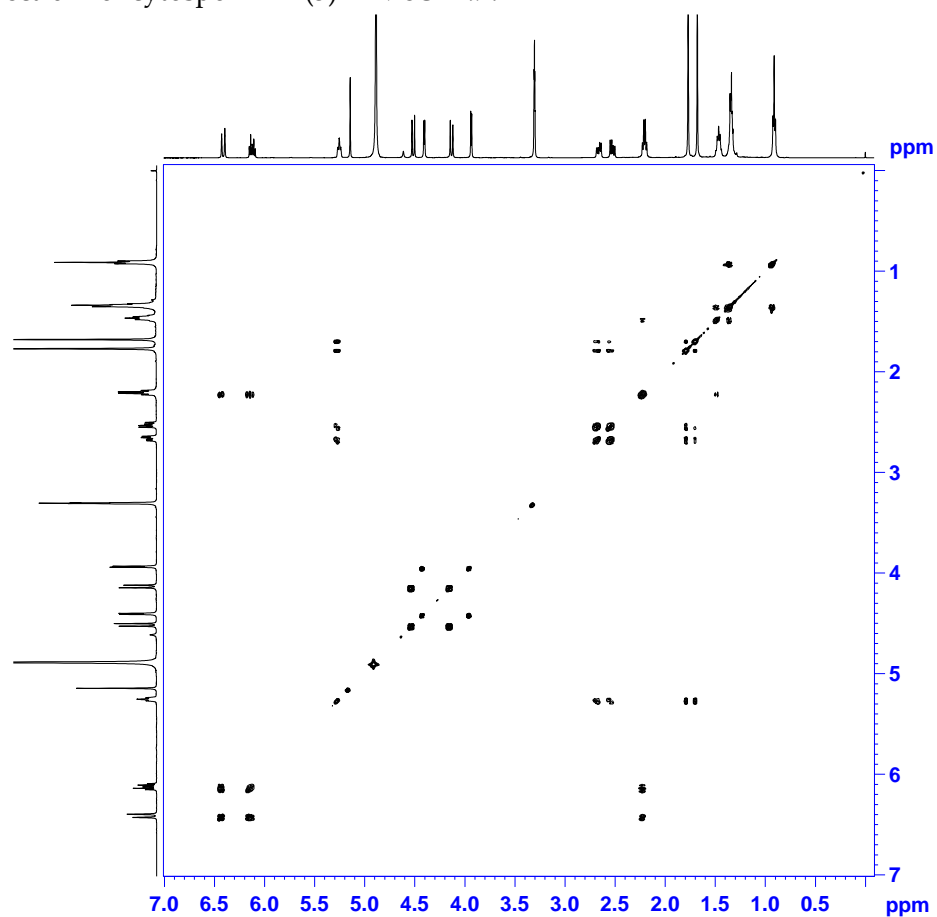

S52. HMBC spectrum of cytosporin Y<sub>2</sub> (5) in MeOD-*d*<sub>4</sub>.

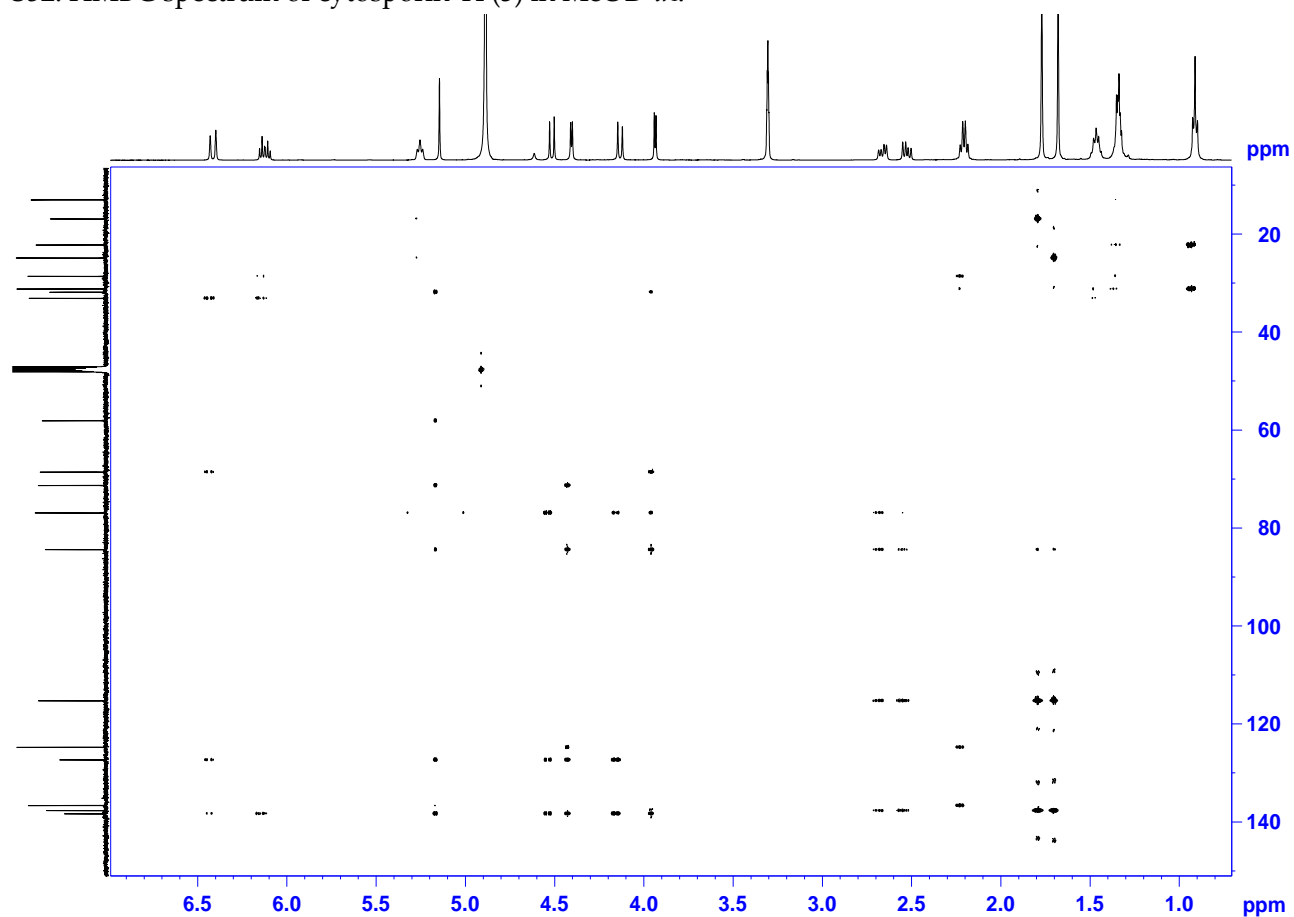

S53. NOESY spectrum of cytosporin Y<sub>2</sub> (5) in MeOD-*d*<sub>4</sub>.

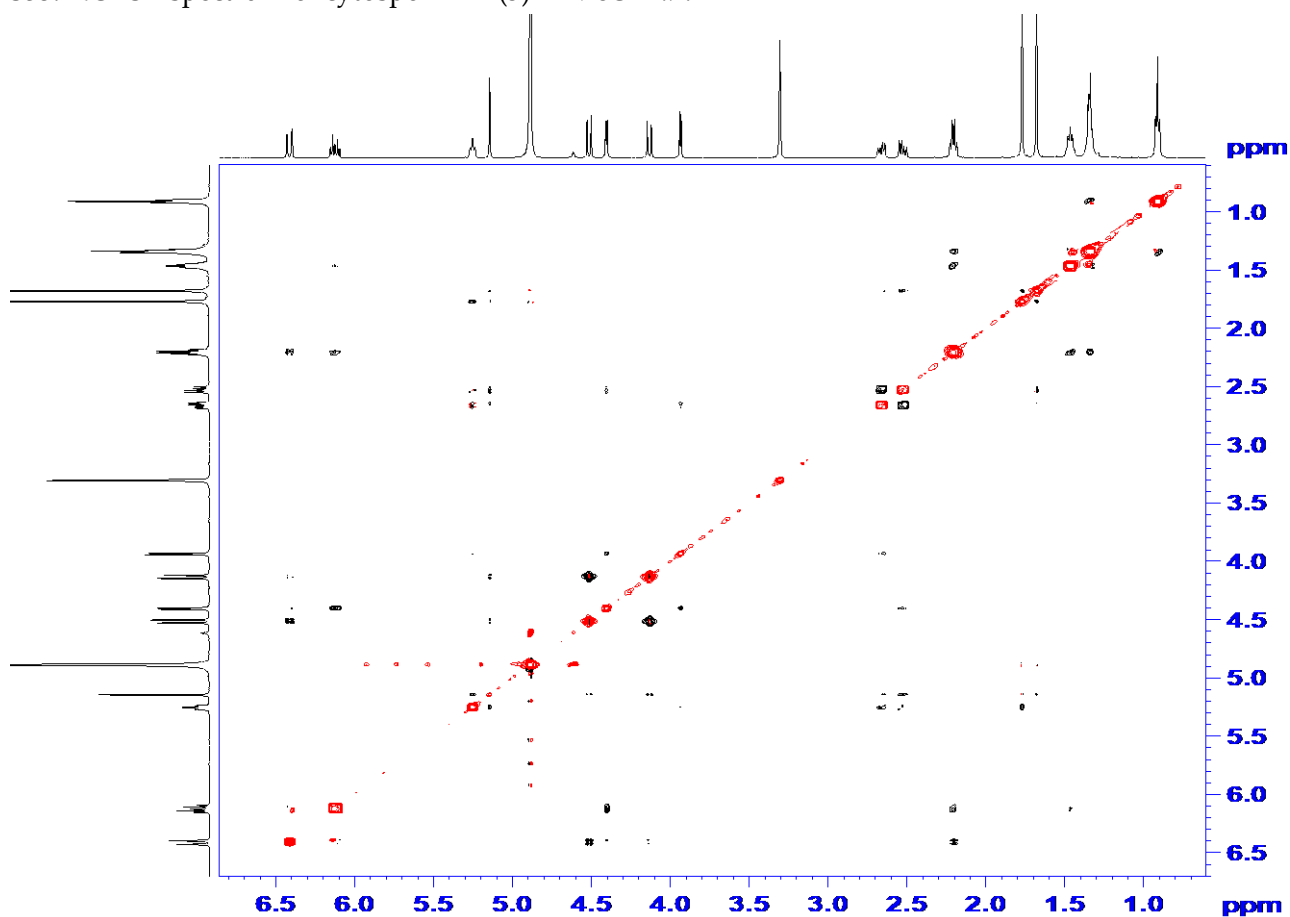

S54. HRESIMS of cytosporin Y<sub>2</sub> (5).

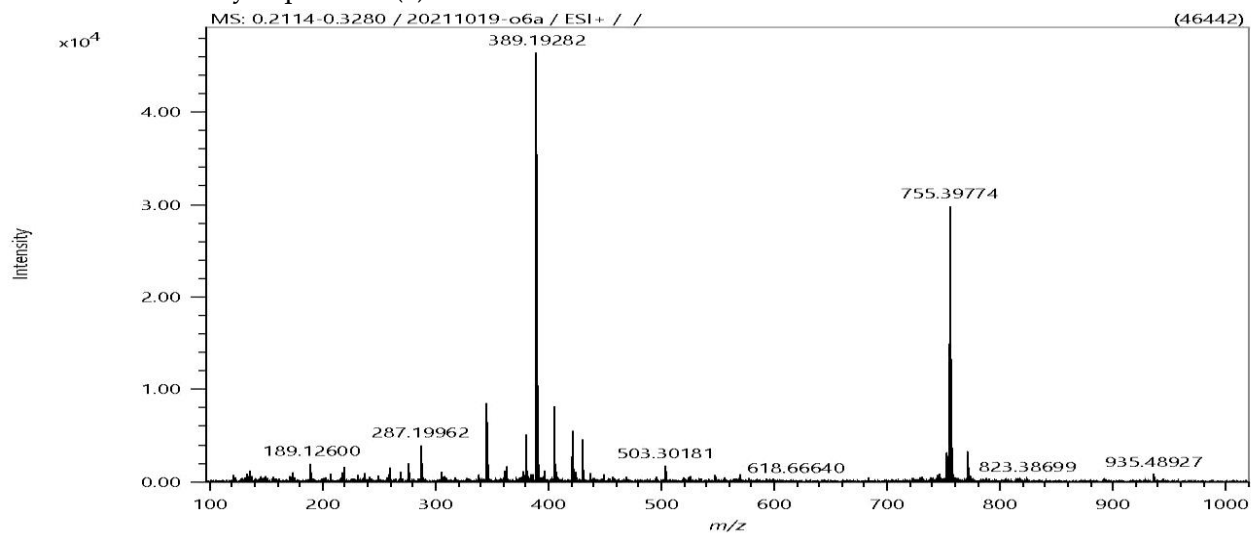

#### Elemental Composition

##### Parameters

Tolerance:  $\pm 5.00$  ppm  
 Electron: Odd/Even  
 Charge: +1  
 DBE: -1.5 - 200.0

##### Elements Set 1:

| Symbol | C   | H   | N | O | Na | S | Cl | Br |
|--------|-----|-----|---|---|----|---|----|----|
| Min    | 0   | 0   | 0 | 0 | 1  | 0 | 0  | 0  |
| Max    | 200 | 200 | 4 | 8 | 1  | 0 | 0  | 0  |

  

| Symbol | P | Si | F |
|--------|---|----|---|
| Min    | 0 | 0  | 0 |
| Max    | 0 | 0  | 0 |

#### Results

| Mass      | Intensity | Intensity [%] | Formula                                                          | Calculated Mass | Mass Difference [mDa] | Mass Difference [ppm] | DBE |
|-----------|-----------|---------------|------------------------------------------------------------------|-----------------|-----------------------|-----------------------|-----|
| 389.19282 | 46442.49  | 100.00        | C <sub>20</sub> H <sub>30</sub> O <sub>6</sub> Na                | 389.19346       | -0.64                 | -1.64                 | 5.5 |
|           |           |               | C <sub>18</sub> H <sub>28</sub> N <sub>3</sub> O <sub>5</sub> Na | 389.19212       | 0.71                  | 1.81                  | 6.0 |



S55. UV spectrum of cytosporin Y<sub>2</sub> (5) in MeOH.

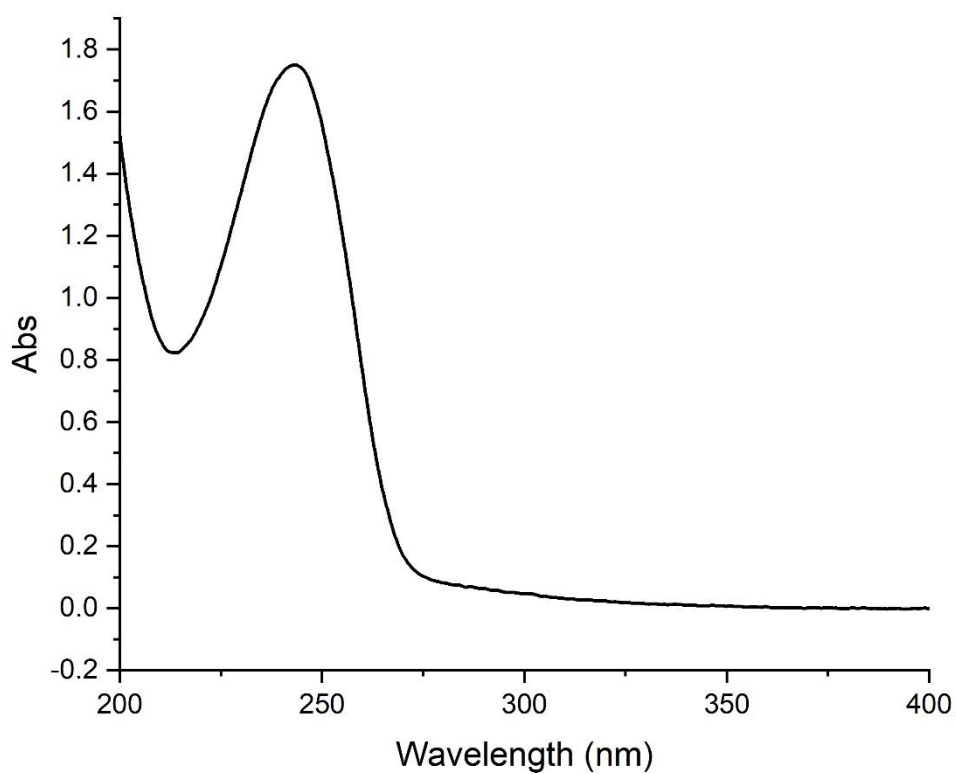

S56. IR spectrum of cytosporin Y<sub>2</sub> (5) (KBr).

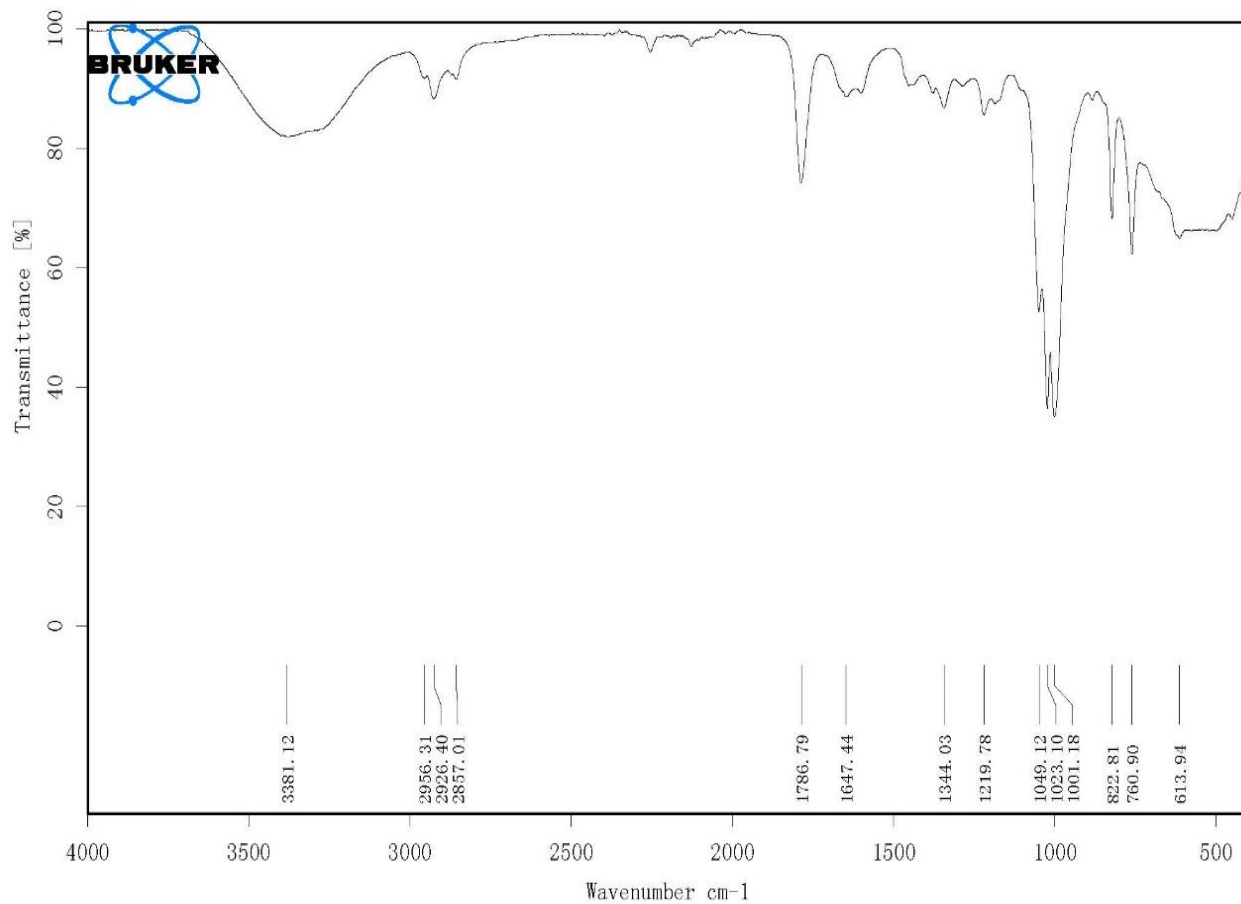

S57.  $^1\text{H}$  NMR spectrum of cytosporin Y<sub>3</sub> (6) in  $\text{CDCl}_3$ .

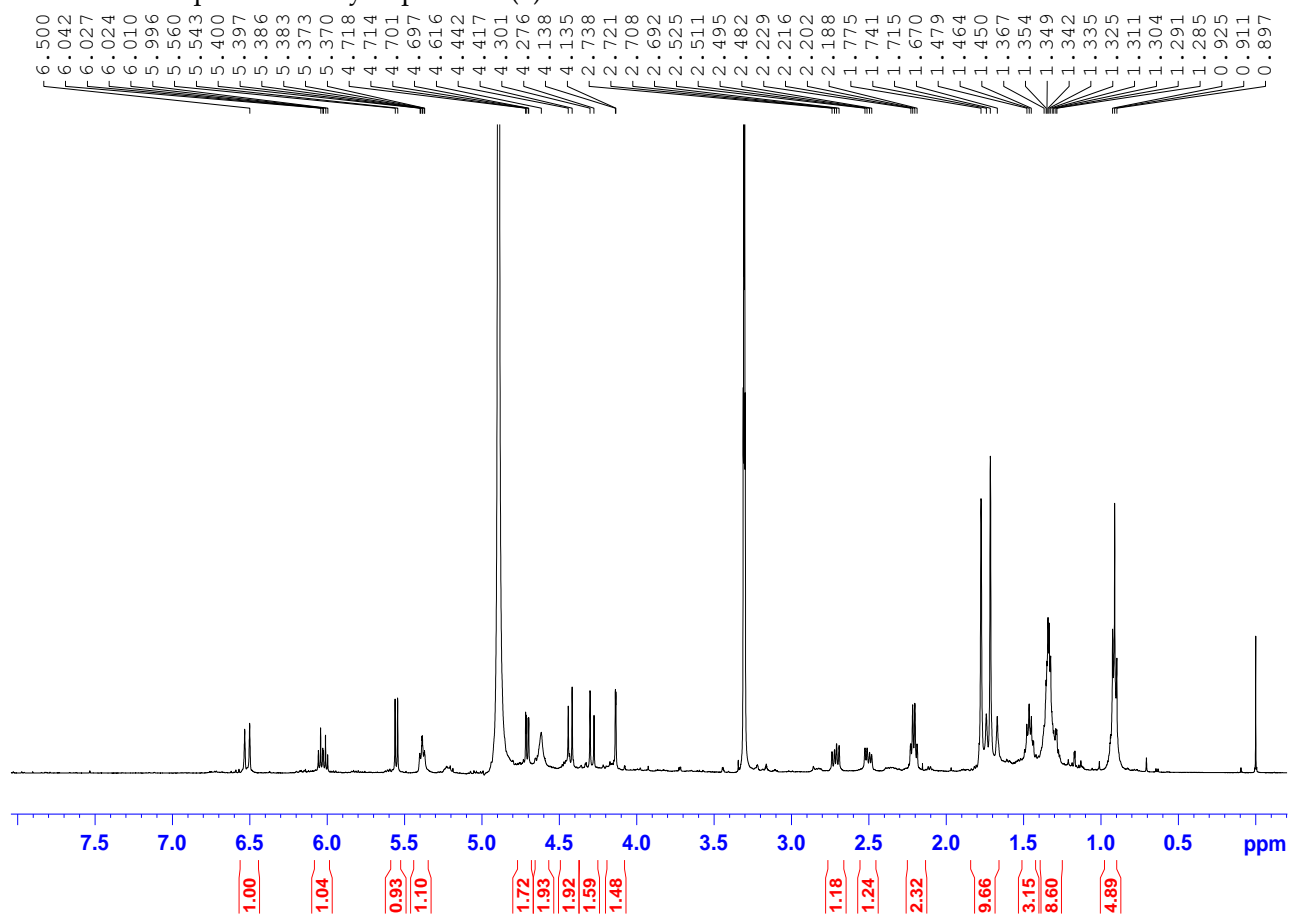

S58.  $^{13}\text{C}$  NMR spectrum of cytosporin Y<sub>3</sub> (6) in  $\text{CDCl}_3$ .

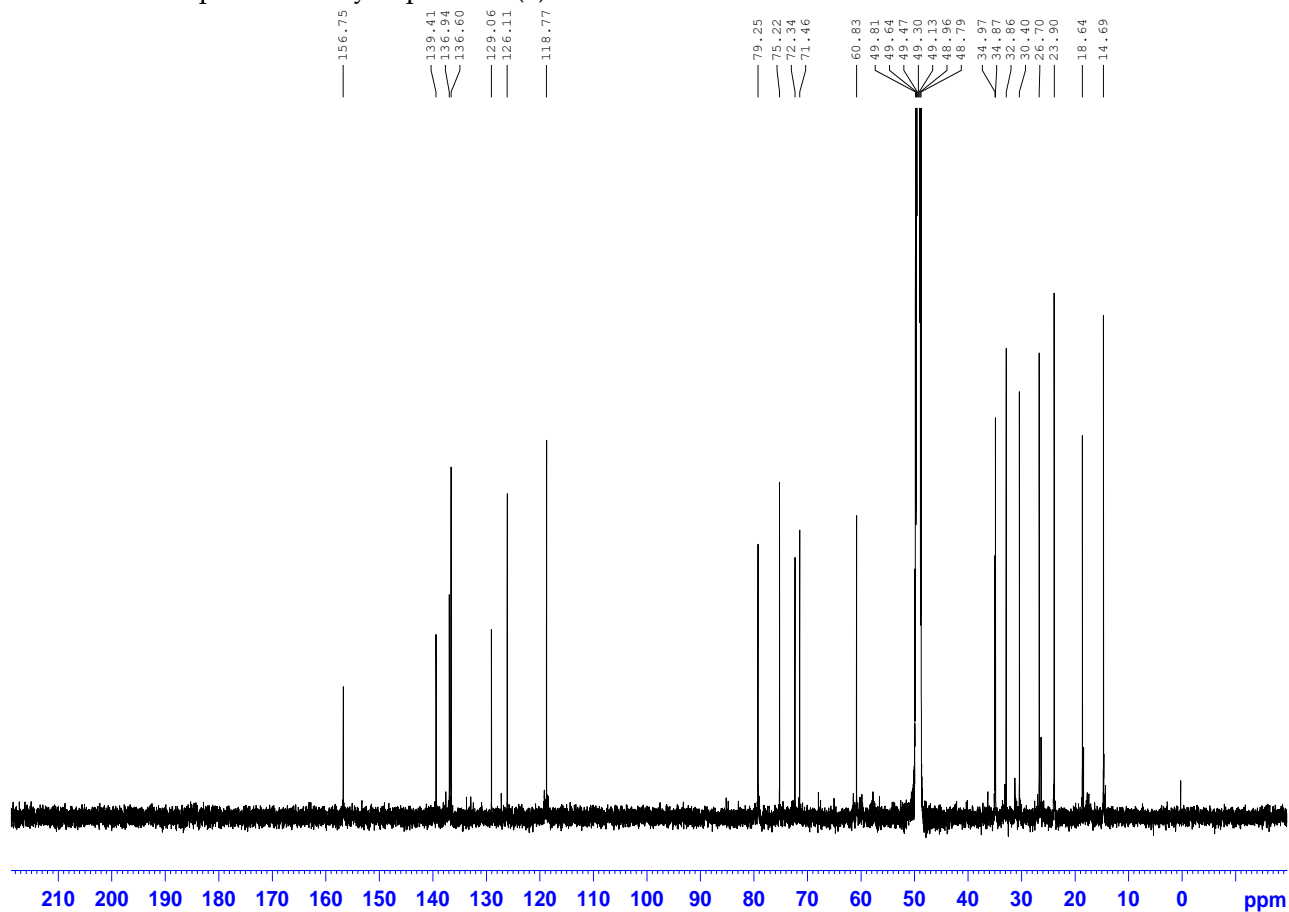

S59. DEPT135 spectrum of cytosporin Y<sub>3</sub> (**6**) in CDCl<sub>3</sub>.

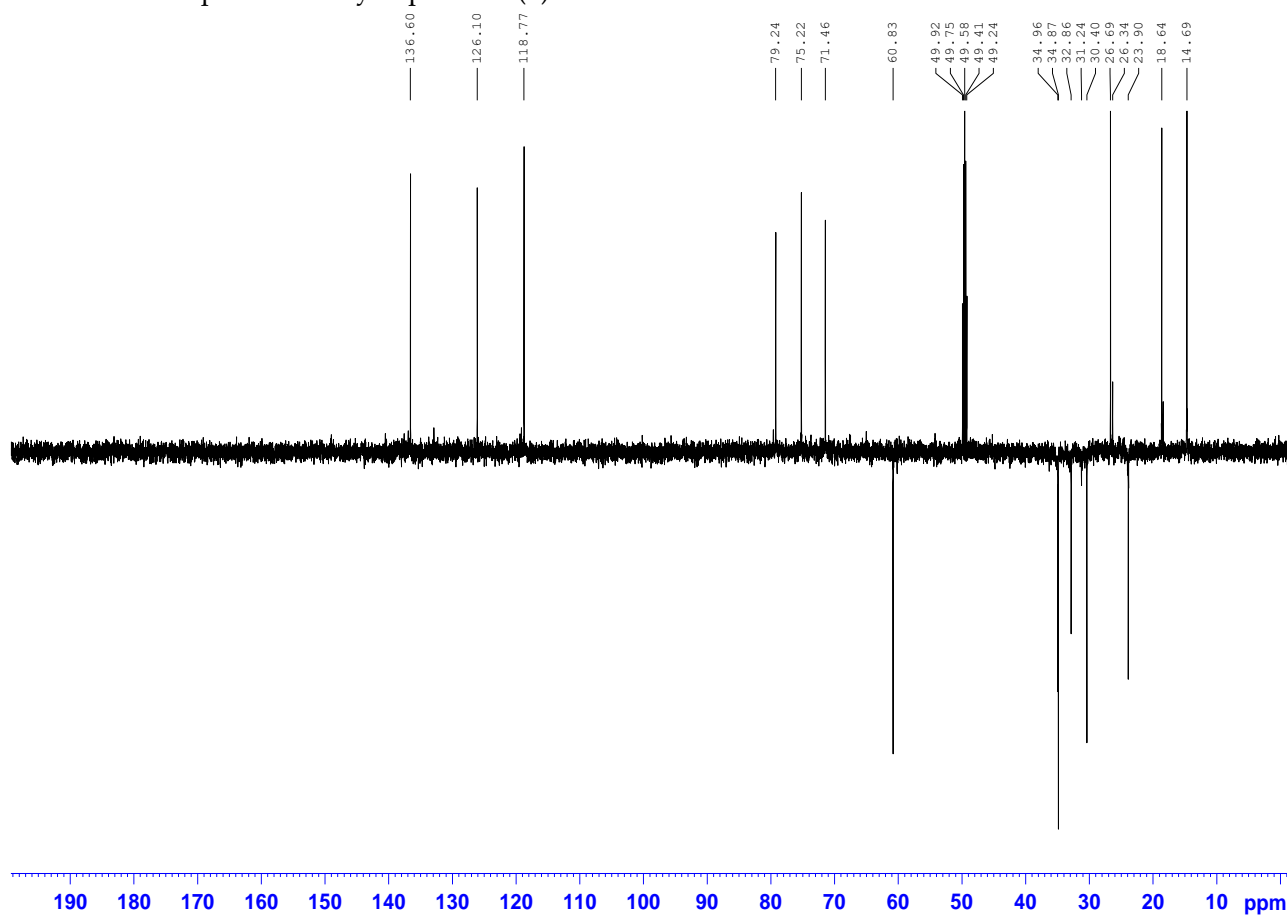

S60. HSQC spectrum of cytosporin Y<sub>3</sub> (**6**) in CDCl<sub>3</sub>.

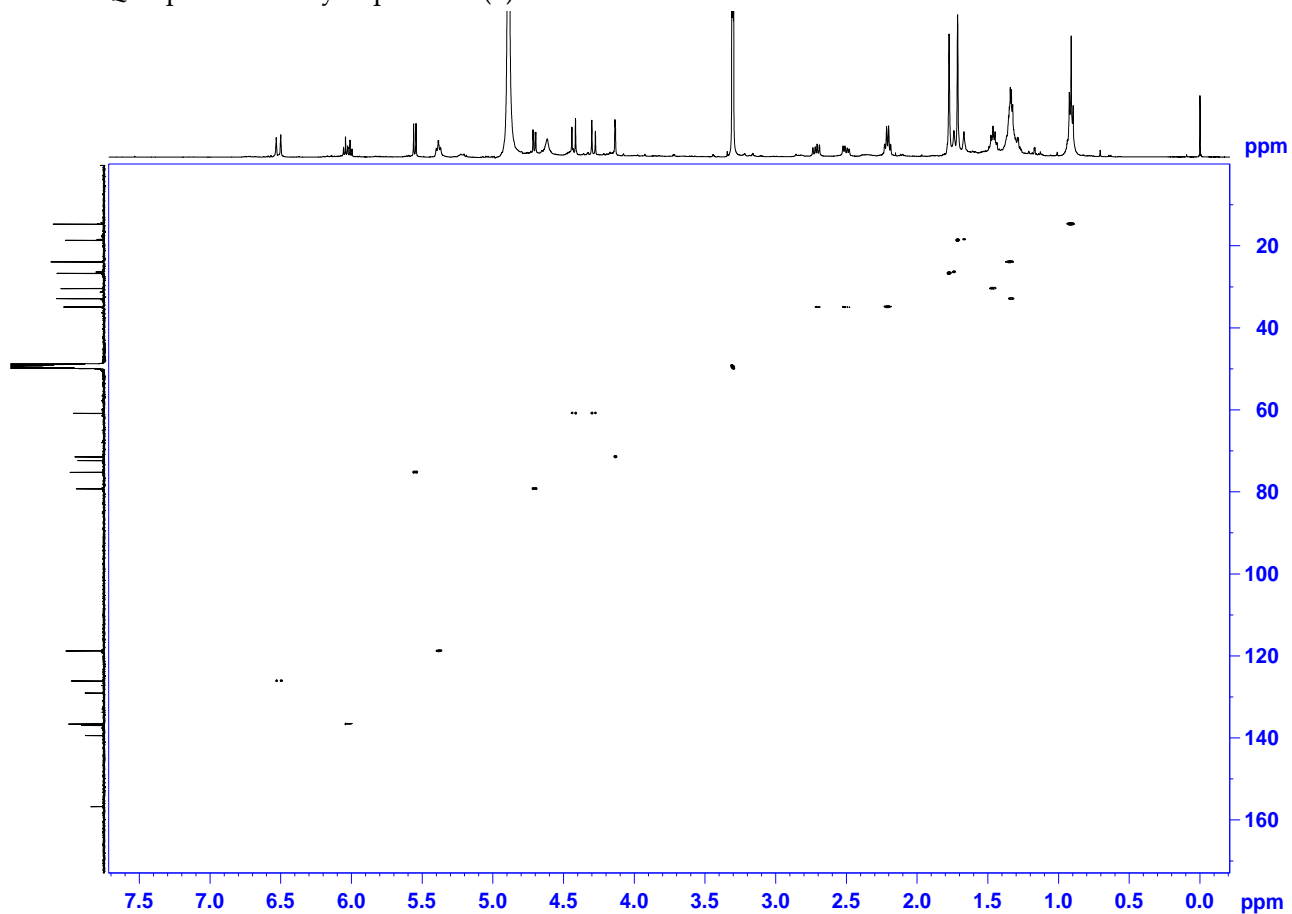

S61. COSY spectrum of cytosporin Y<sub>3</sub> (**6**) in CDCl<sub>3</sub>.

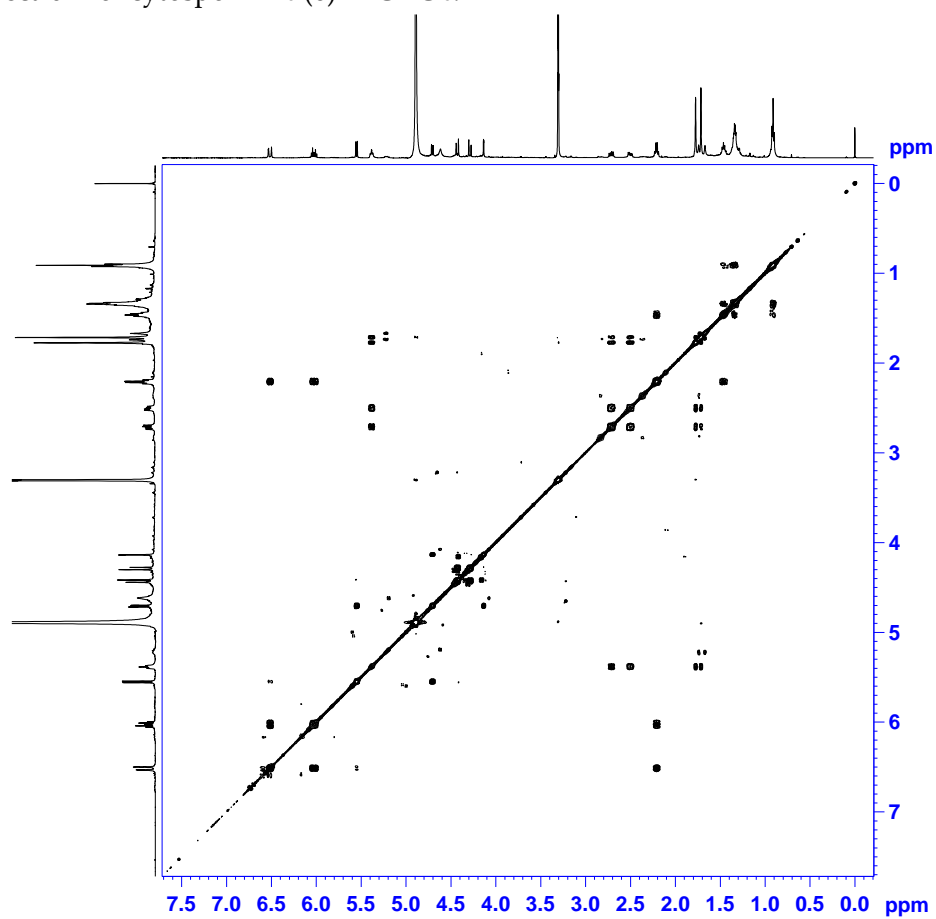

S62. HMBC spectrum of cytosporin Y<sub>3</sub> (**6**) in CDCl<sub>3</sub>.

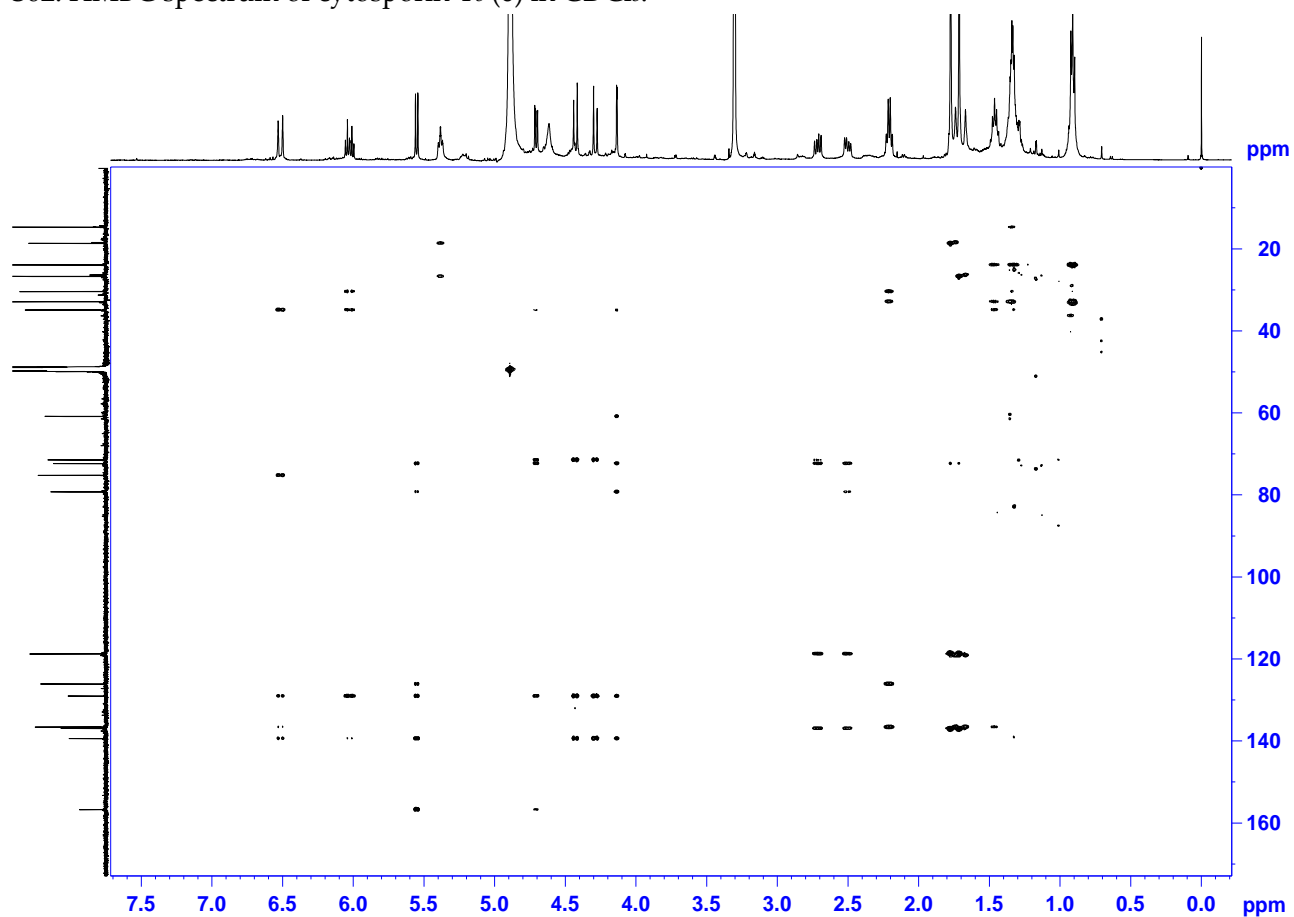

S63. NOESY spectrum of cytosporin Y<sub>3</sub> (6) in CDCl<sub>3</sub>.

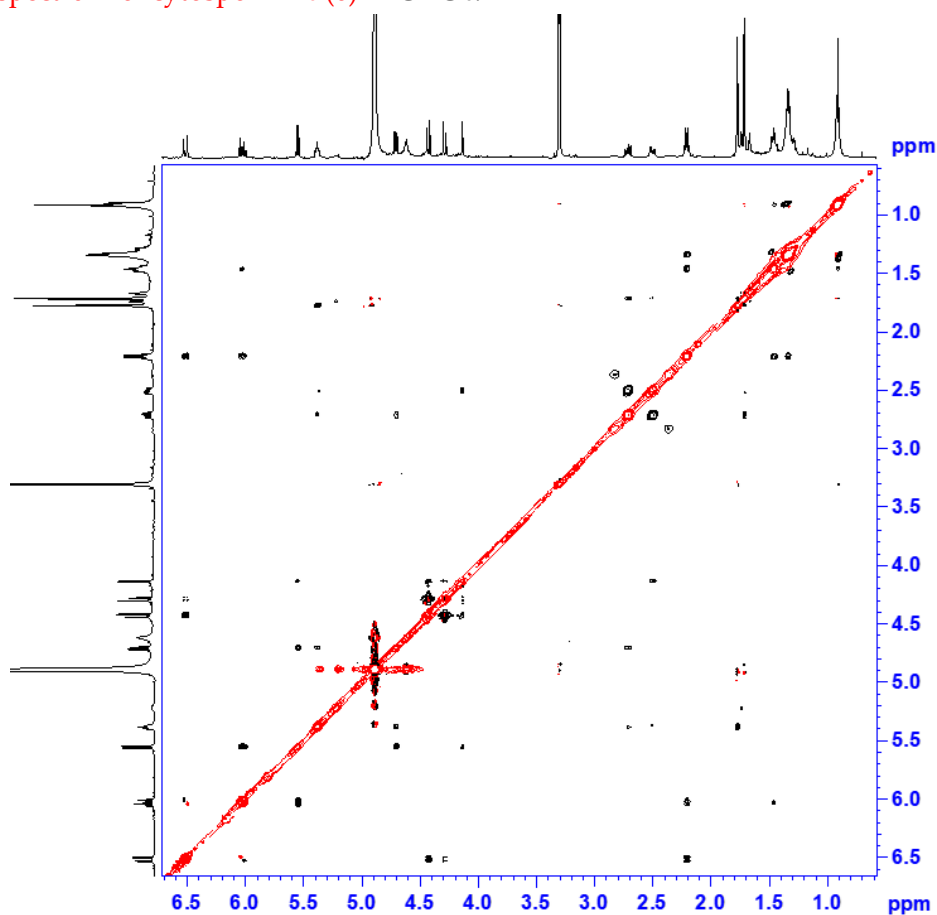

S64. HRESIMS of cytosporin Y<sub>3</sub> (6).

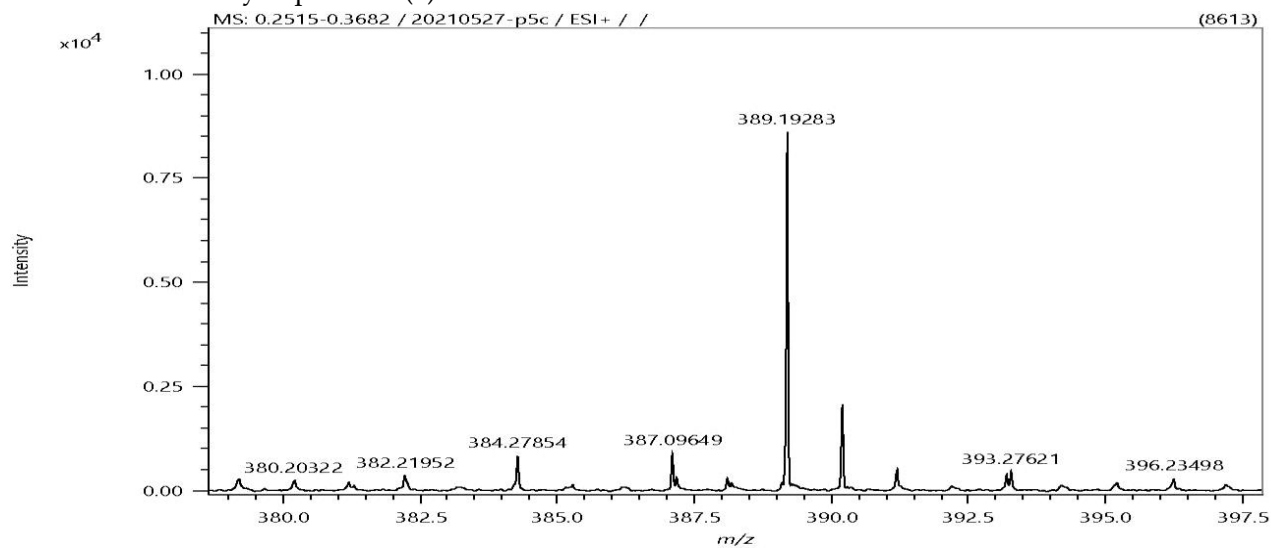

#### Elemental Composition

##### Parameters

Tolerance:  $\pm 5.00$  ppm  
 Electron: Odd/Even  
 Charge: +1  
 DBE: -1.5 - 200.0

##### Elements Set 1:

| Symbol | C   | H   | N | O | Na | S | Cl | Br |
|--------|-----|-----|---|---|----|---|----|----|
| Min    | 0   | 0   | 0 | 0 | 1  | 0 | 0  | 0  |
| Max    | 200 | 200 | 0 | 8 | 1  | 0 | 0  | 0  |

  

| Symbol | F | Si |
|--------|---|----|
| Min    | 0 | 0  |
| Max    | 0 | 0  |

#### Results

| Mass      | Intensity | Intensity [%] | Formula                                           | Calculated Mass | Mass Difference [mDa] | Mass Difference [ppm] | DBE |
|-----------|-----------|---------------|---------------------------------------------------|-----------------|-----------------------|-----------------------|-----|
| 389.19283 | 8613.29   | 11.79         | C <sub>20</sub> H <sub>30</sub> O <sub>6</sub> Na | 389.19346       | -0.63                 | -1.62                 | 5.5 |

S65. UV spectrum of cytosporin Y<sub>3</sub> (6) in MeOH.

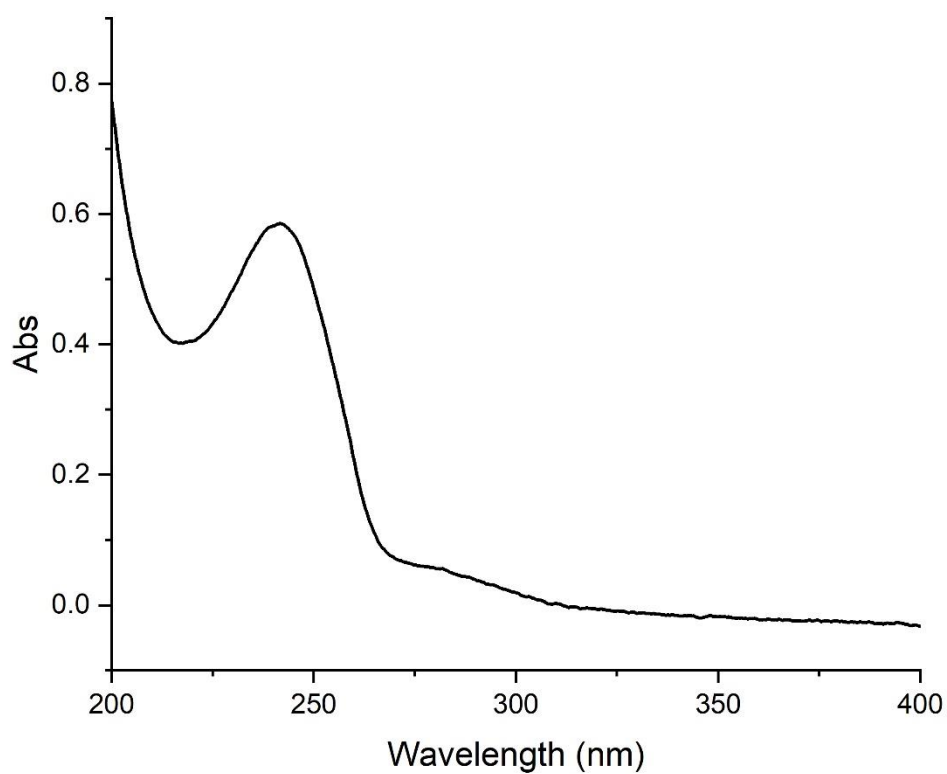

S66. IR spectrum of cytosporin Y<sub>3</sub> (6) (KBr).

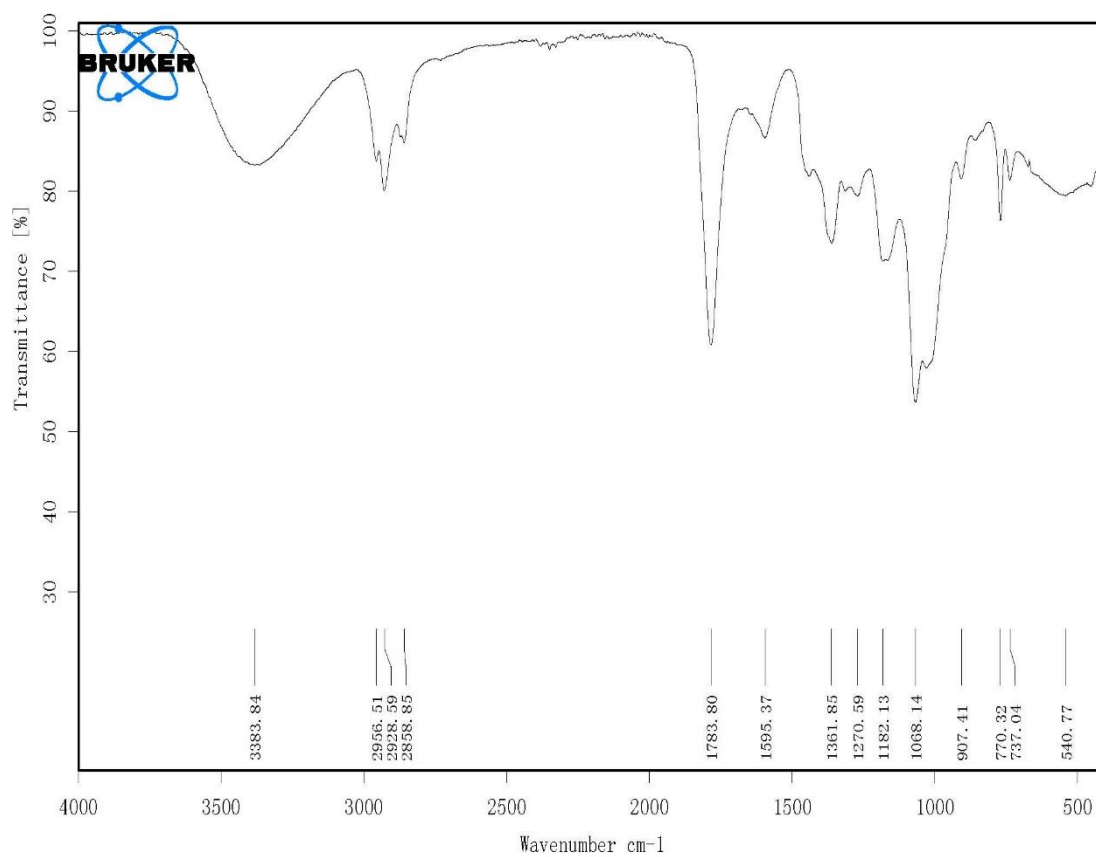

S67.  $^1\text{H}$  NMR spectrum of cytosporin E<sub>1</sub> (7) in  $\text{CDCl}_3$ .

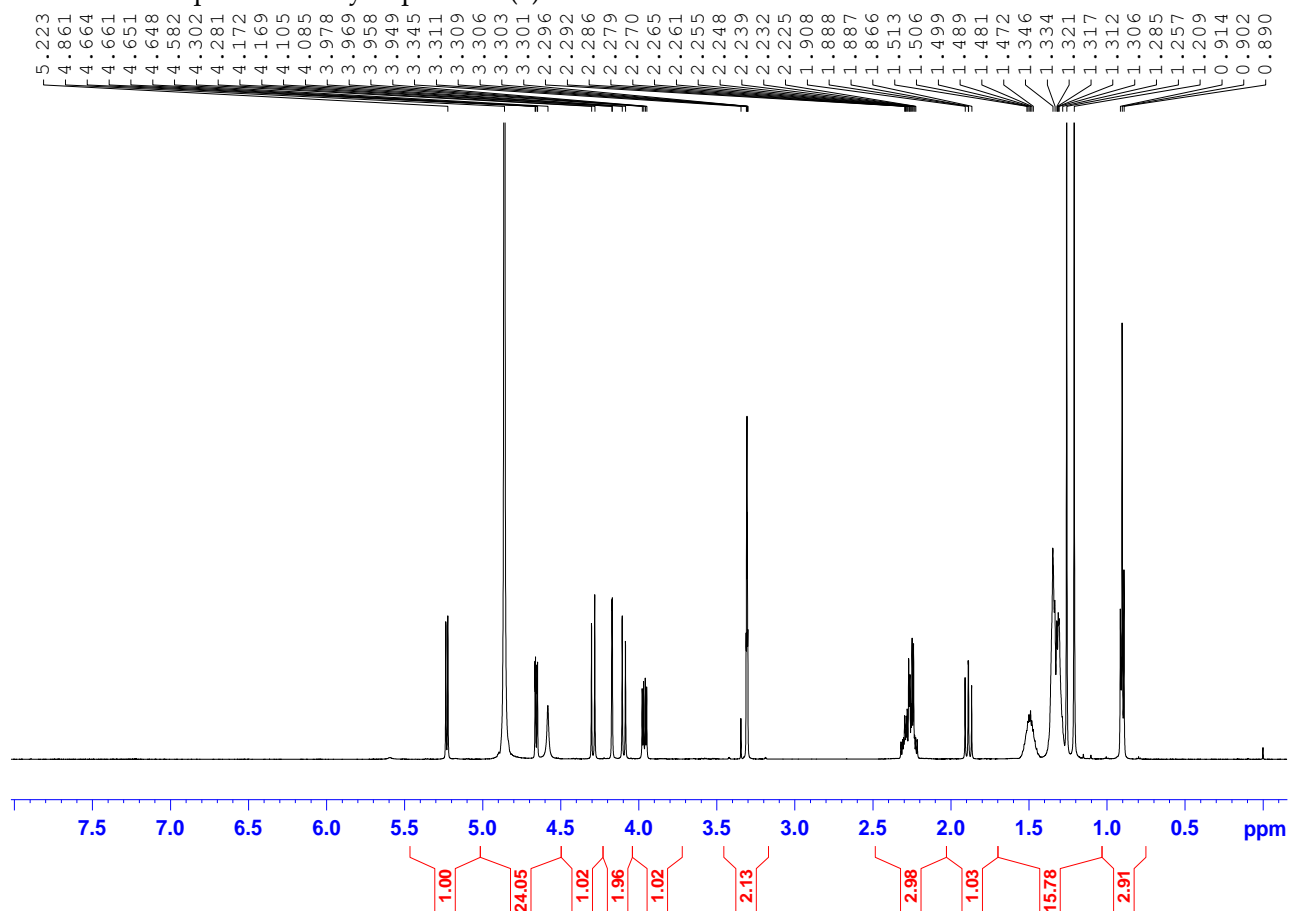

S68.  $^1\text{H}$  NMR spectrum of cytosporin E<sub>1</sub> (7) in  $\text{DMSO}-d_6$ .

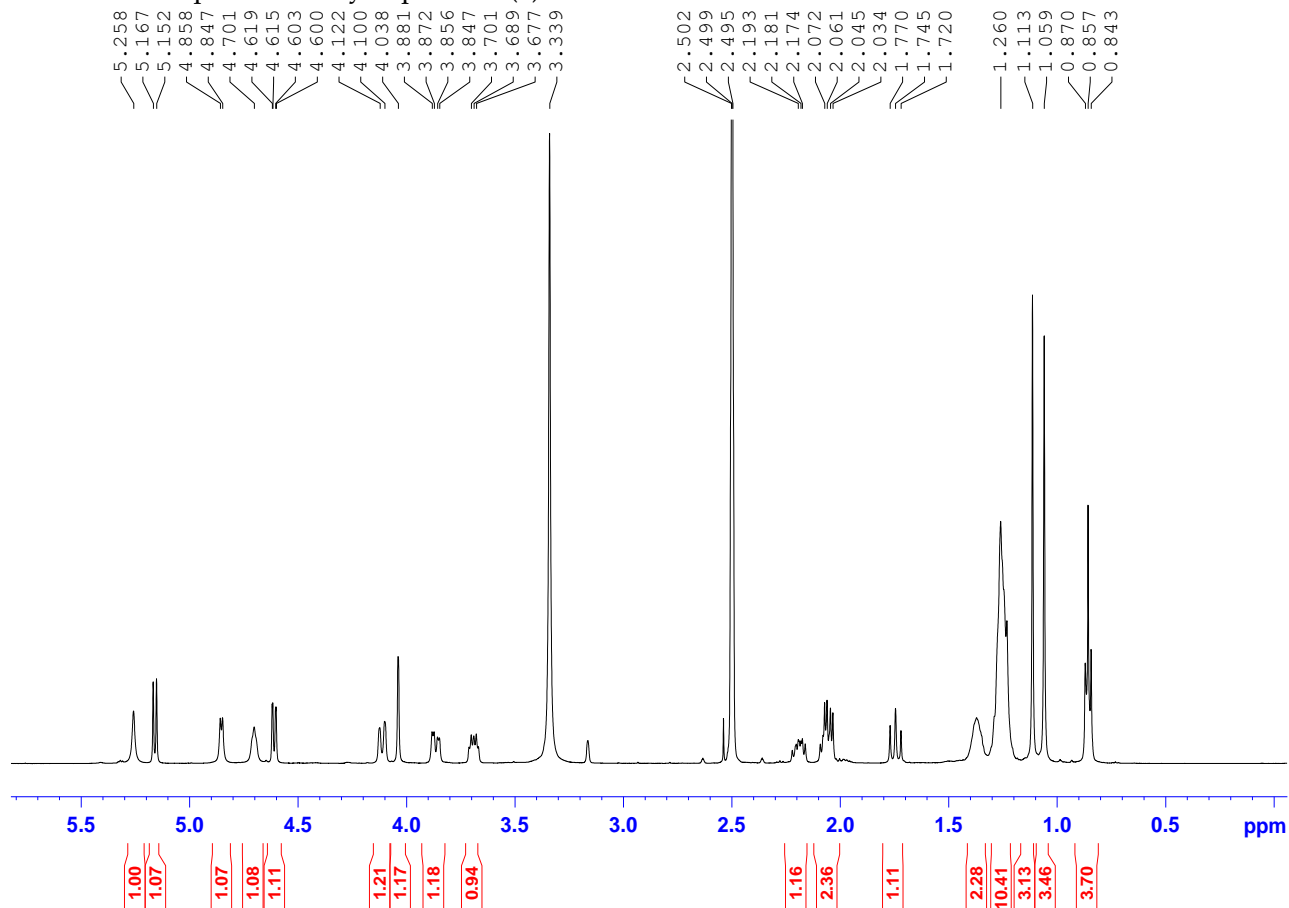

S69.  $^{13}\text{C}$  NMR spectrum of cytosporin E<sub>1</sub> (7) in  $\text{CDCl}_3$ .

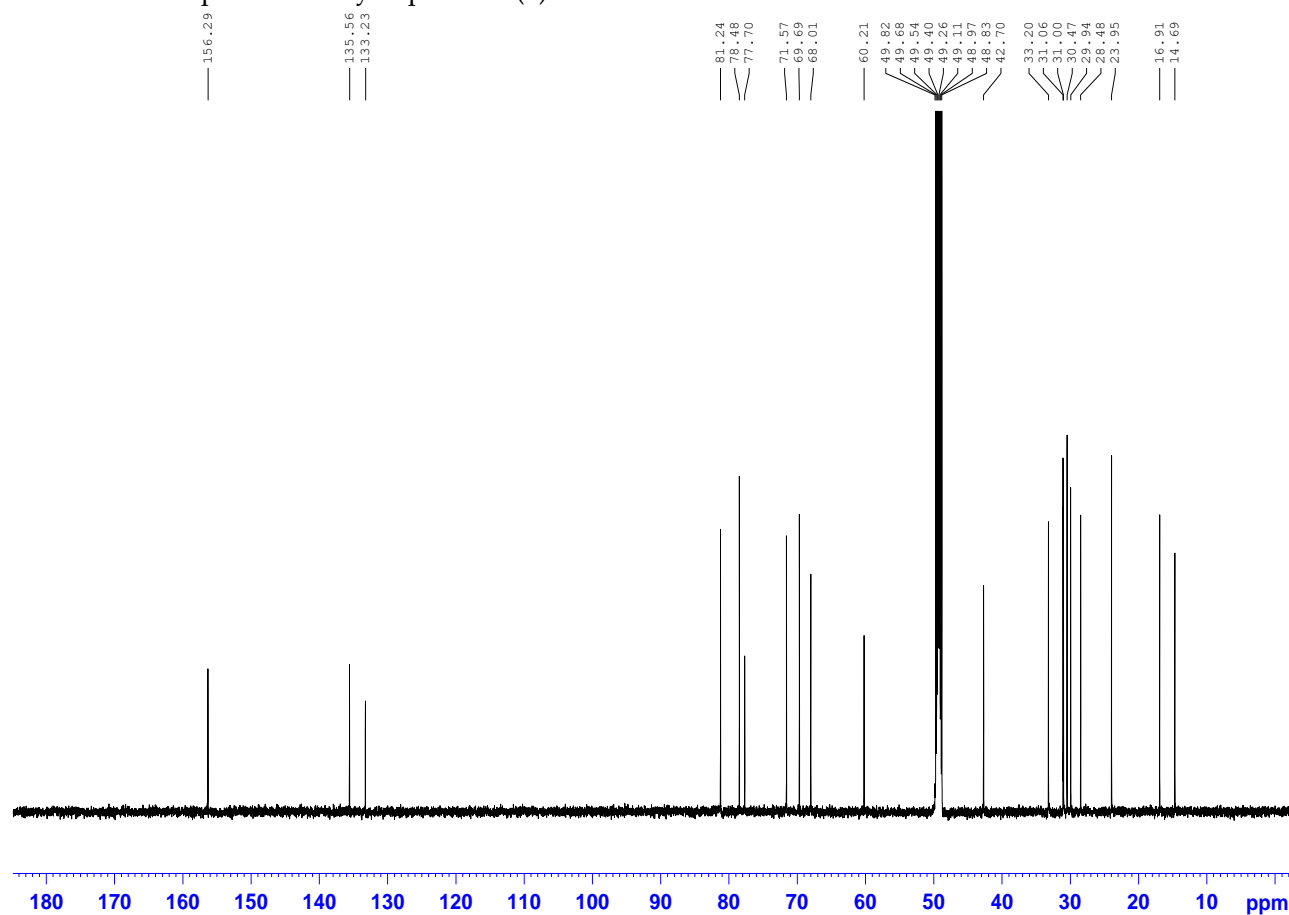

S70. DEPT135 spectrum of cytosporin E<sub>1</sub> (7) in  $\text{CDCl}_3$ .

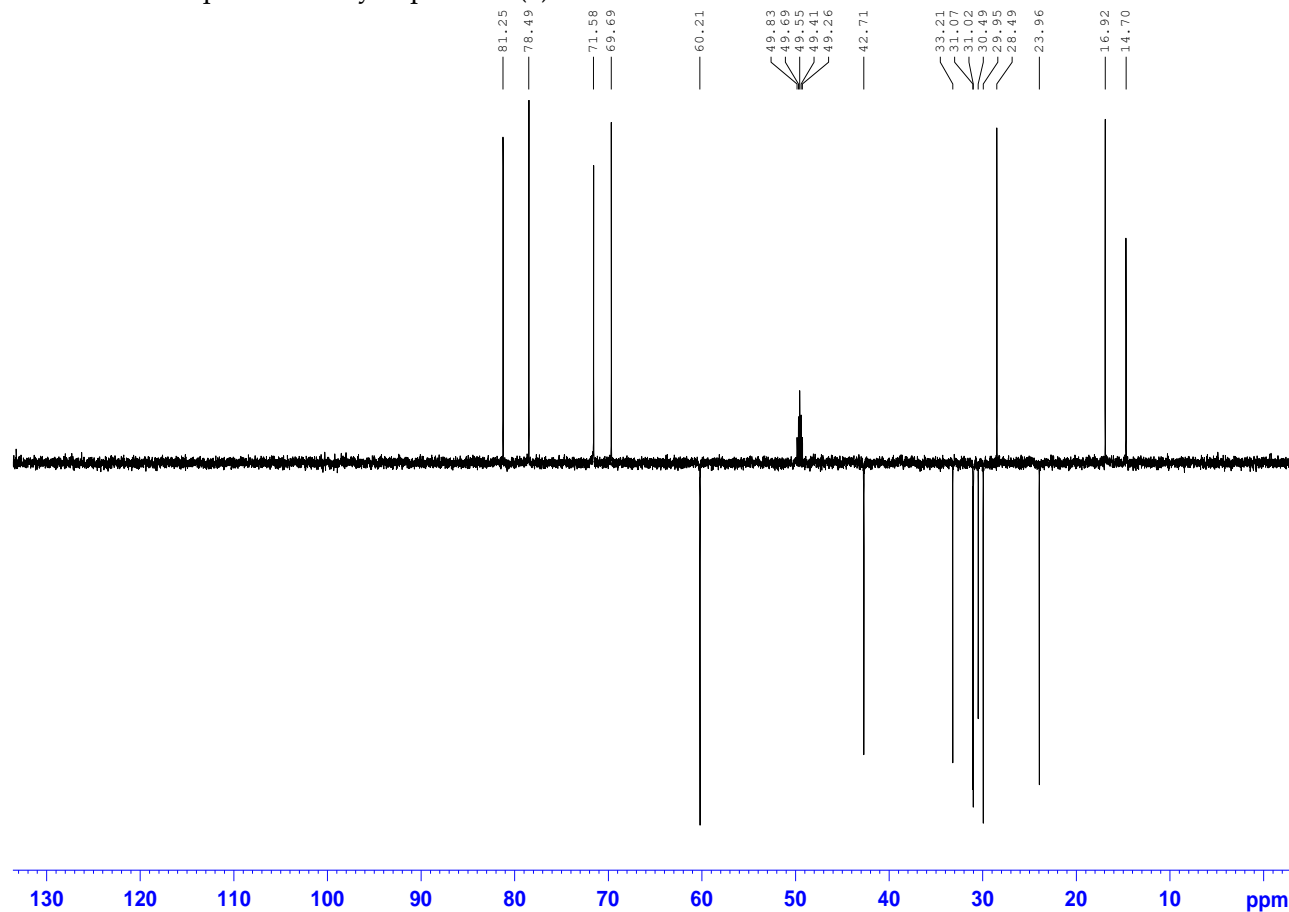



S71. HSQC spectrum of cytosporin E<sub>1</sub> (7) in CDCl<sub>3</sub>.

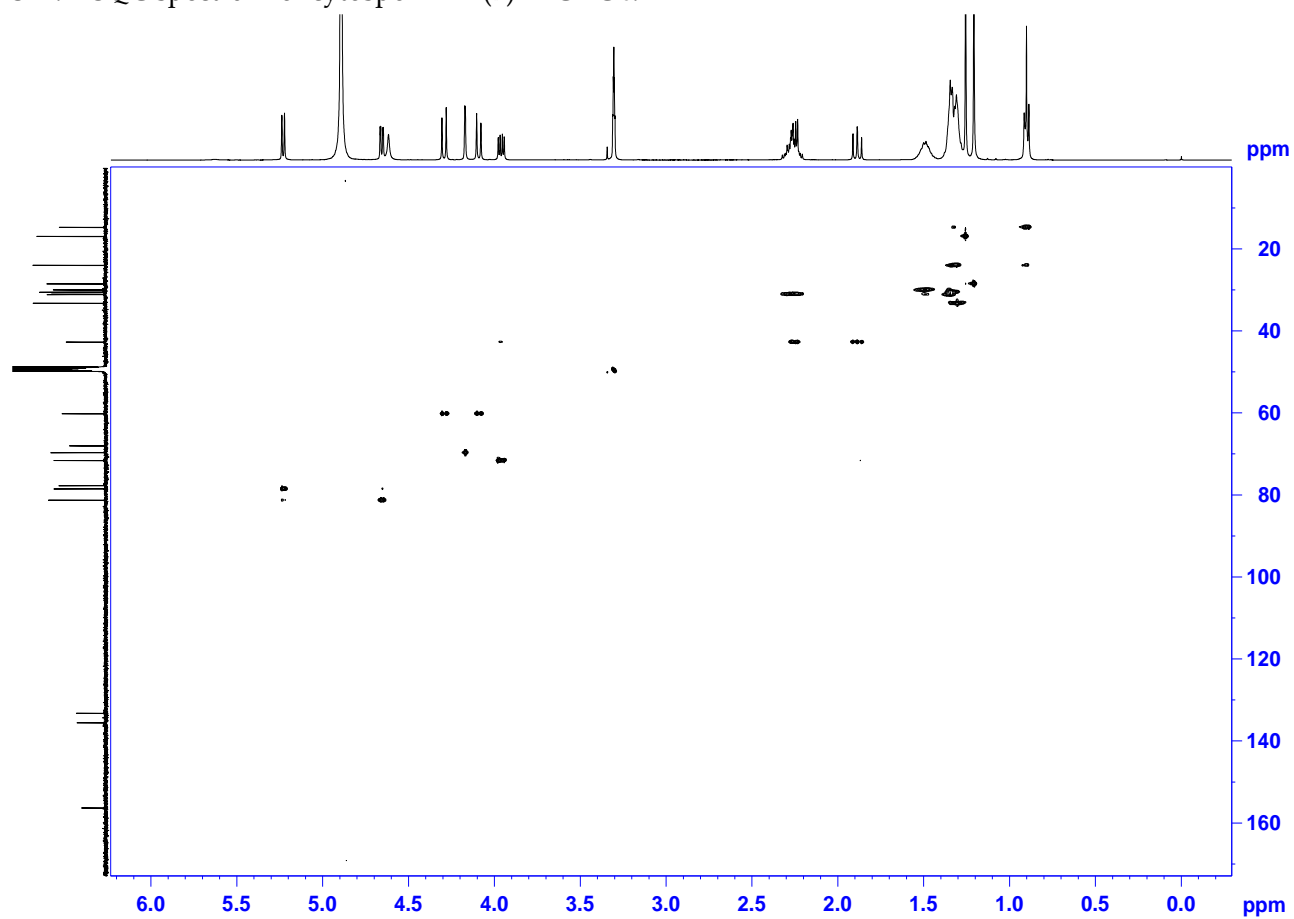

S72. COSY spectrum of cytosporin E<sub>1</sub> (7) in CDCl<sub>3</sub>.

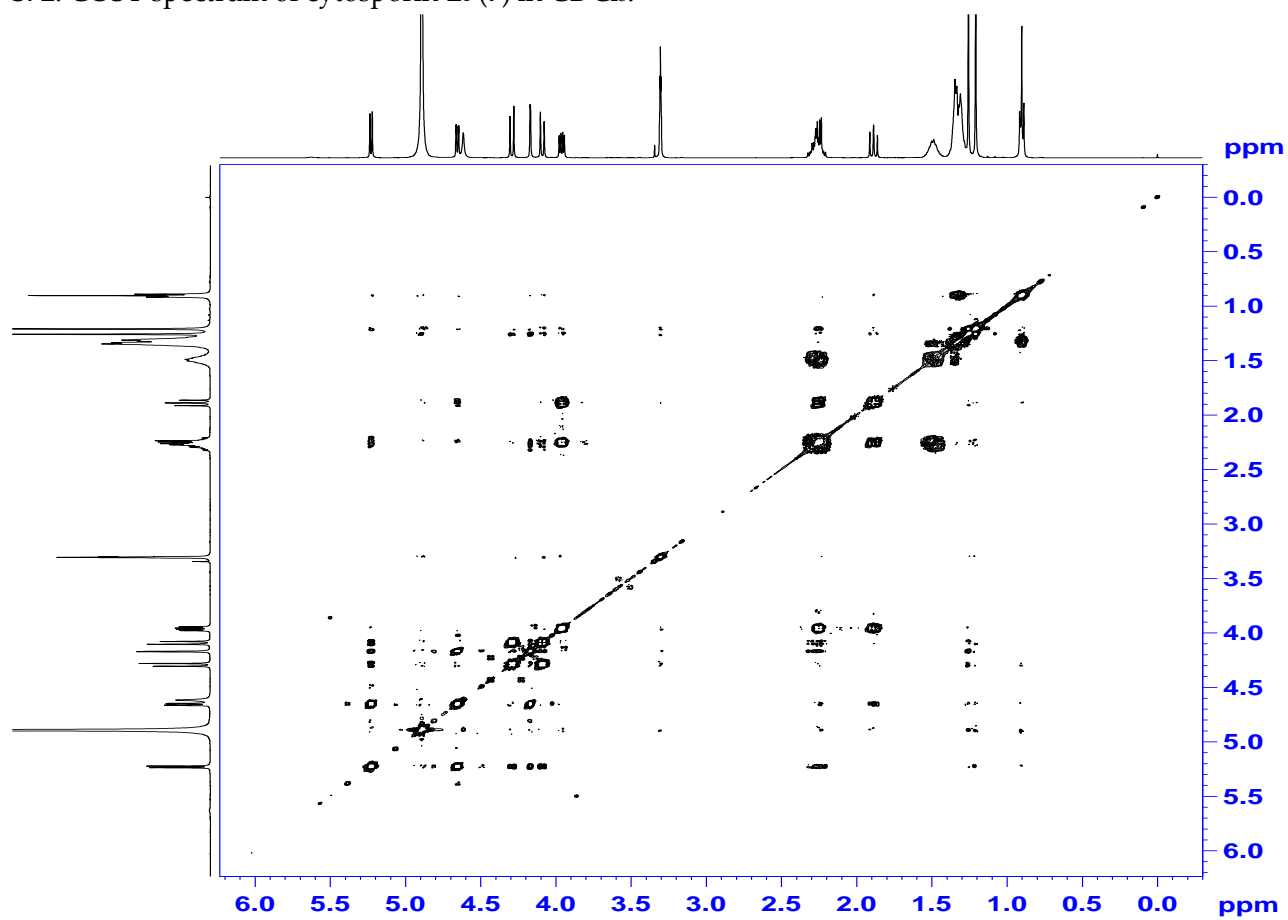

S73. HMBC spectrum of cytosporin E<sub>1</sub> (7) in CDCl<sub>3</sub>.

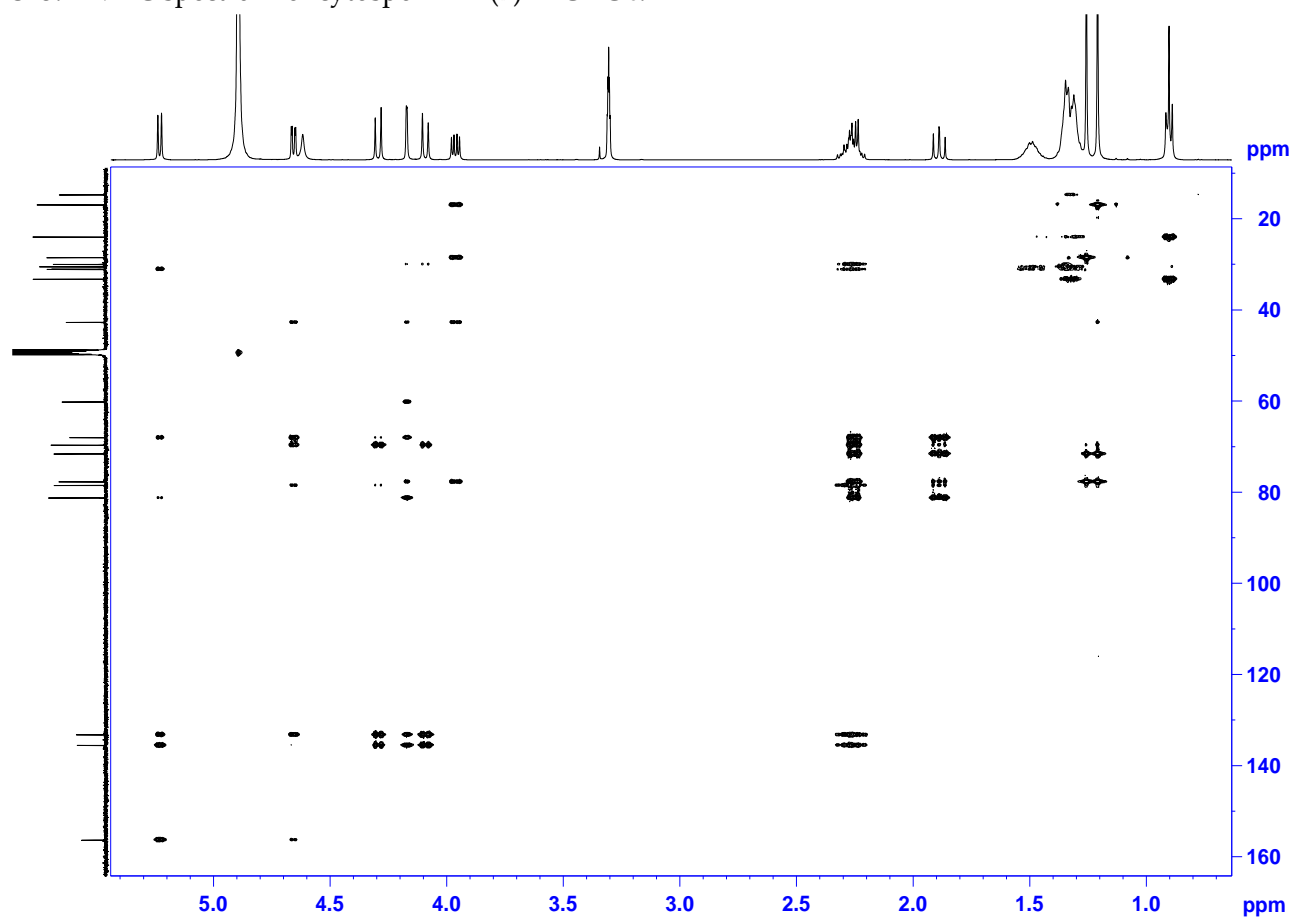

S74. NOESY spectrum of cytosporin E<sub>1</sub> (7) in CDCl<sub>3</sub>.

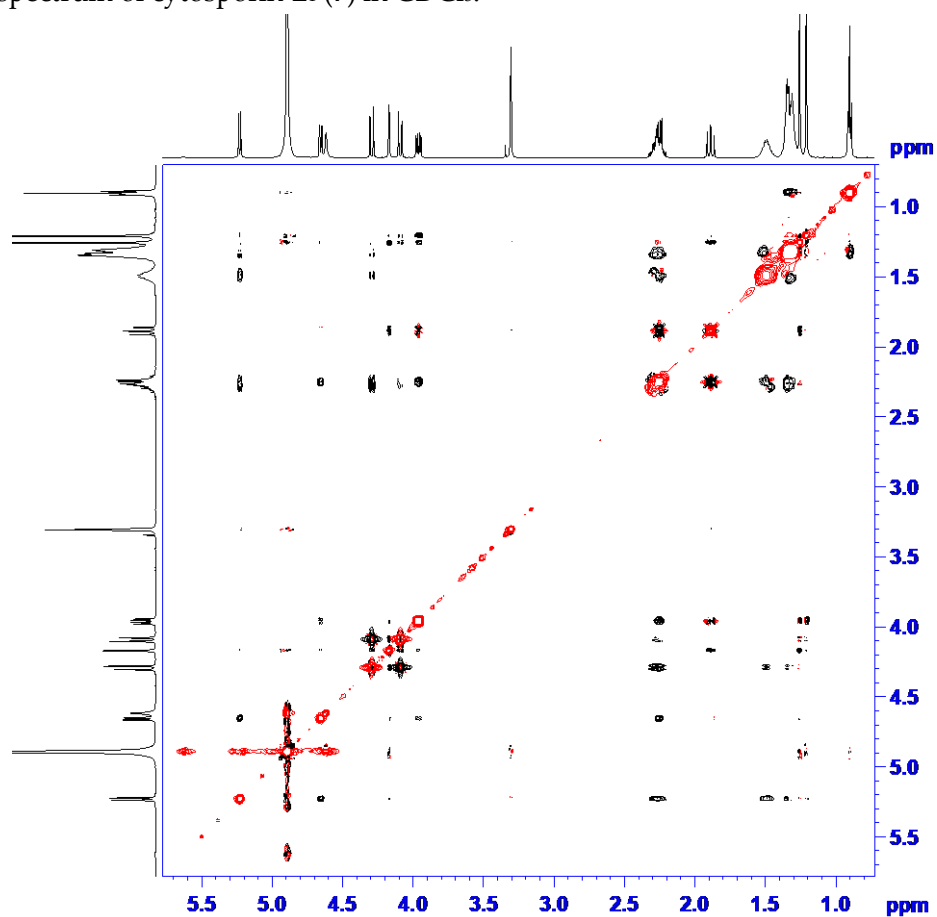

S75. NOESY spectrum of cytosporin E<sub>1</sub> (7) in DMSO-*d*<sub>6</sub>.

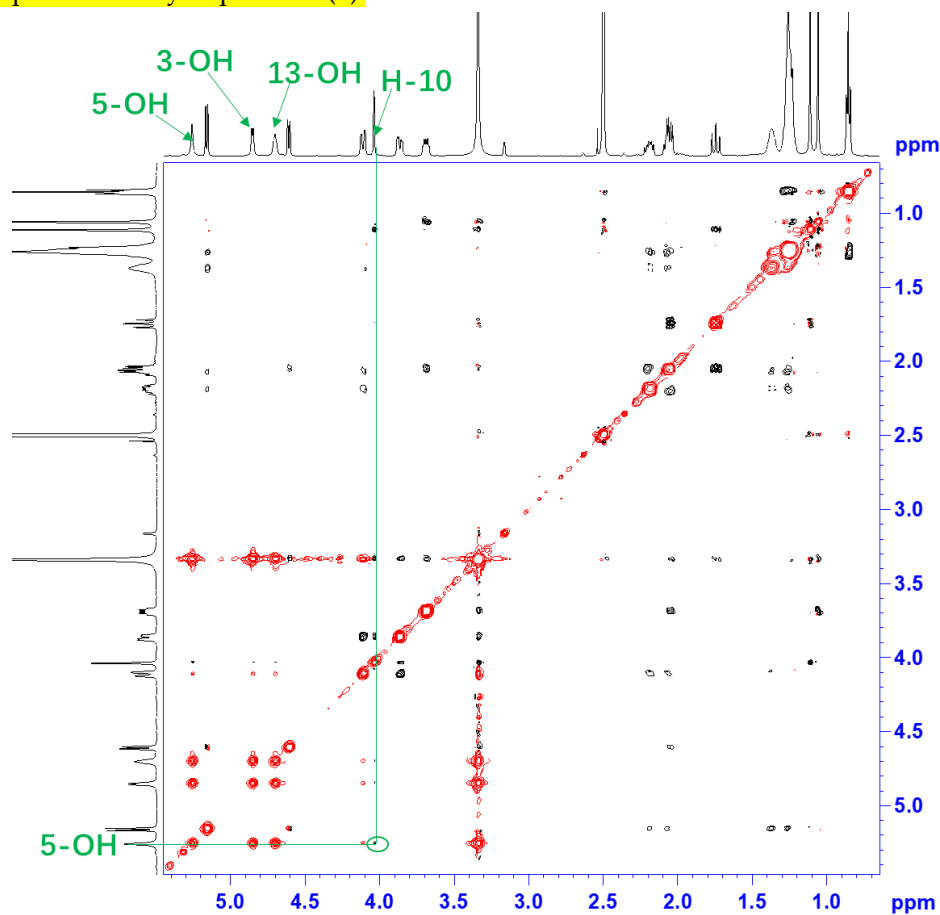

S76. HRESIMS of cytosporin E<sub>1</sub> (7).

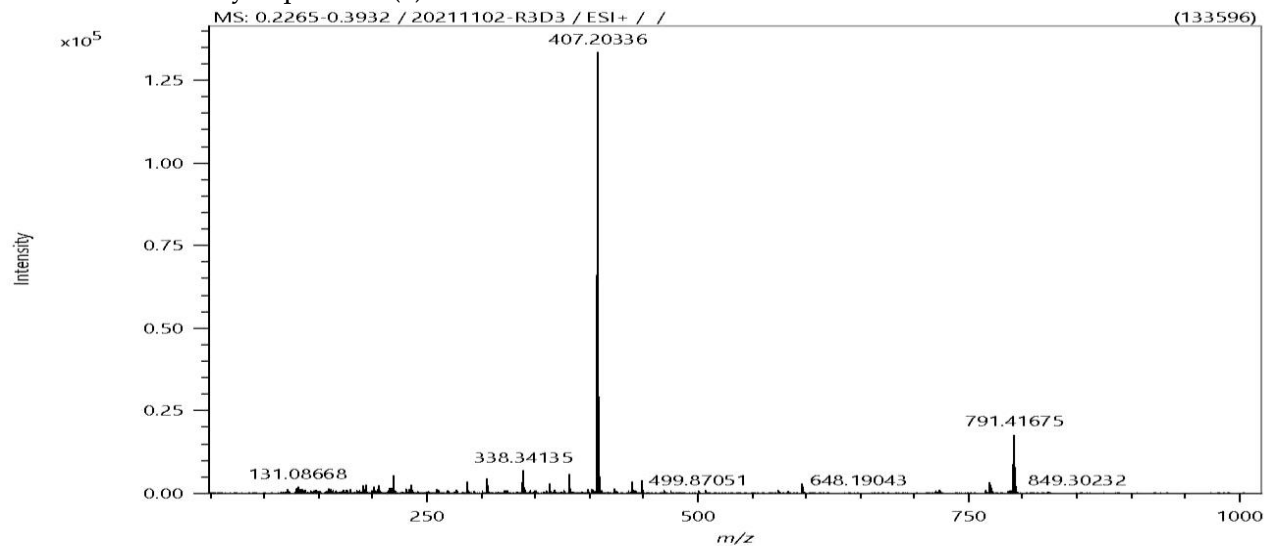

Elemental Composition

Parameters  
Tolerance:  $\pm 5.00$  ppm  
Electron: Odd/Even  
Charge: +1  
DBE: -1.5 - 200.0

Elements Set 1:

| Symbol | C   | H   | N | O  | Na | S | Cl | Br |
|--------|-----|-----|---|----|----|---|----|----|
| Min    | 0   | 0   | 0 | 0  | 1  | 0 | 0  | 0  |
| Max    | 200 | 200 | 0 | 10 | 1  | 0 | 0  | 0  |

| Symbol | P | I | F | D |
|--------|---|---|---|---|
| Min    | 0 | 0 | 0 | 0 |
| Max    | 0 | 0 | 0 | 0 |

Results

| Mass      | Intensity | Intensity [%] | Formula                                           | Calculated Mass | Mass Difference [mDa] | Mass Difference [ppm] | DBE |
|-----------|-----------|---------------|---------------------------------------------------|-----------------|-----------------------|-----------------------|-----|
| 407.20336 | 133596.09 | 100.00        | C <sub>20</sub> H <sub>32</sub> O <sub>7</sub> Na | 407.20402       | -0.66                 | -1.63                 | 4.5 |

S77. UV spectrum of cytosporin E<sub>1</sub> (**7**) in MeOH.

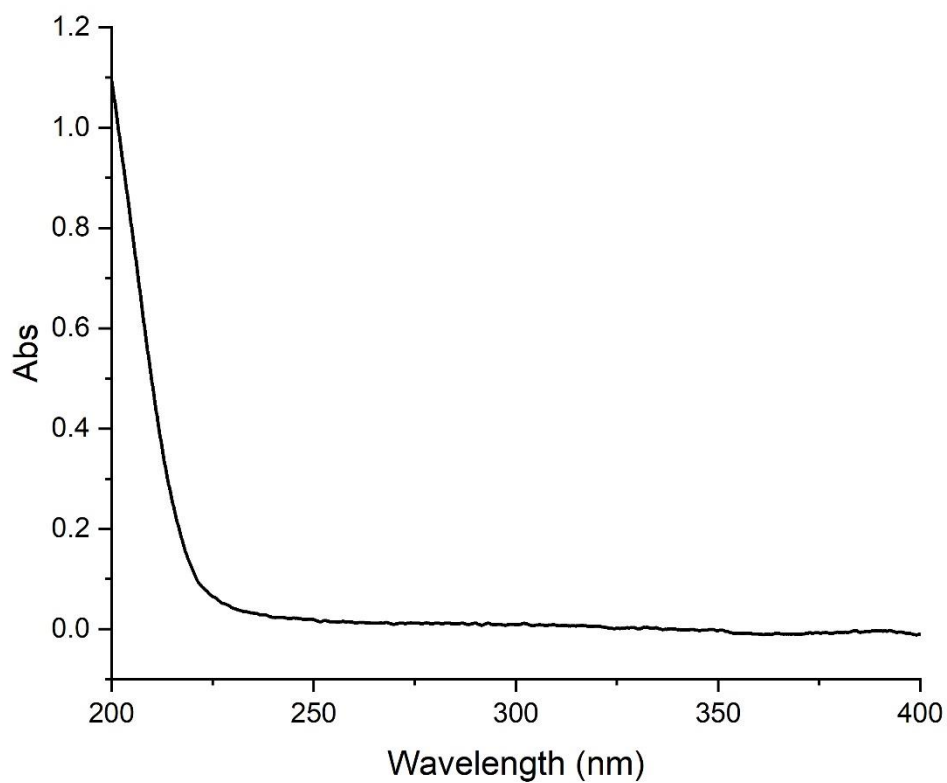

S78. IR spectrum of cytosporin E<sub>1</sub> (**7**) (KBr).

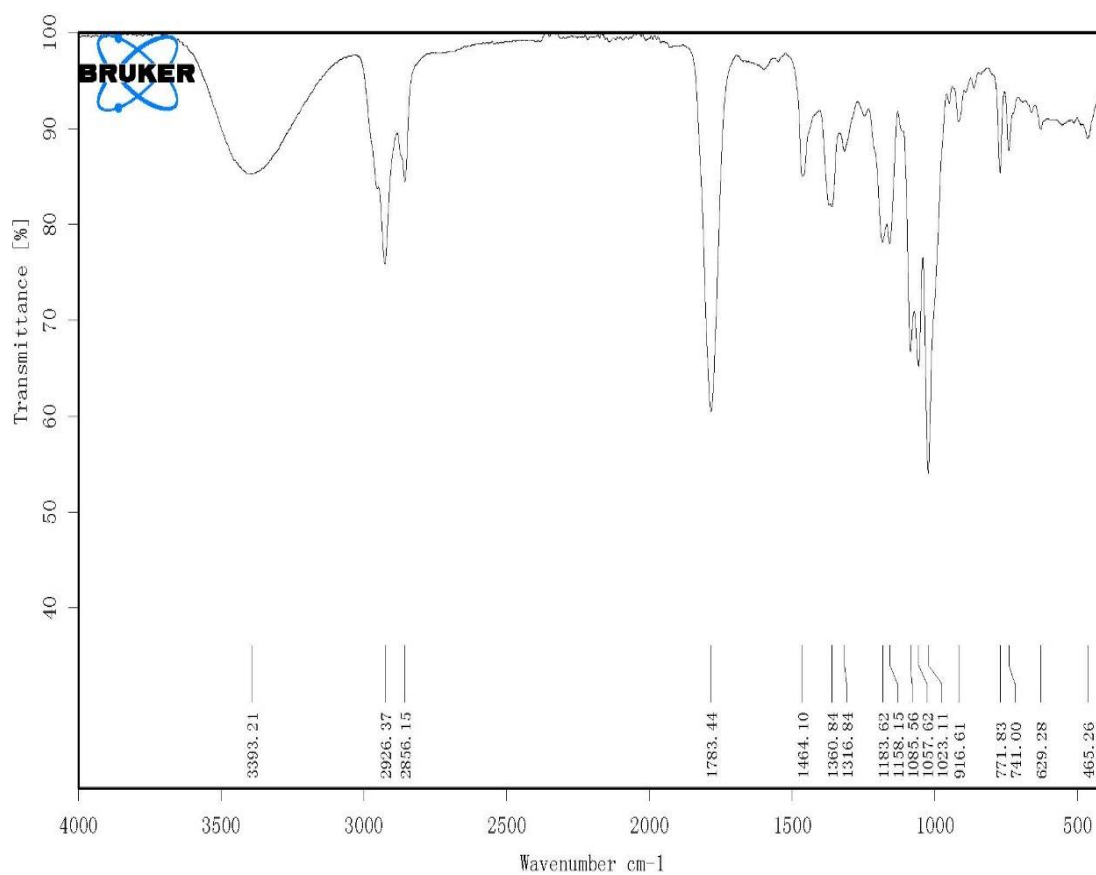

Supplement: s1 [file s1]
